# Supplementary material for: Immune cells mediate the causal relationship between the gut microbiota and different types of endometrial cancer: A bidirectional two-sample, two-step Mendelian randomization study
Source: Research Square preprint supplement (doi:10.21203/rs.3.rs-6189084/v1), 2025-03-28
Supplement: Supplementary file 1 [file 84153702f7fcec4fd77c089c.xlsx]

## Sheet: Table description
Tables	Description
Table S1	STROBE-MR checklist of the study
Table S2	The instruments of Gut microbiota/Immune cells related to Endometrial cancer
Table S3	Sensitivity analysis of MR study on 3 types of EC
Table S4	MR and Sensitivity analysis between gut microbiota and immune cells

## Sheet: Table S1
Table S1. STROBE-MR checklist of the study
Section	Item No.	Checklist item
Title and abstract	1	Indicate Mendelian randomization (MR) as the study’s design in the title and/or the abstract if that is a main purpose of the study
Introduction
Background	2	Explain the scientific background and rationale for the reported study. What is the exposure? Is a potential causal relationship between exposure and outcome plausible? Justify why MR is a helpful method to address the study question
Objectives	3	State specific objectives clearly, including pre-specified causal hypotheses (if any). State that MR is a method that, under specific assumptions, intends to estimate causal effects
Methods
Study design and data sources	4	Present key elements of the study design early in the article. Consider including a table listing sources of data for all phases of the study. For each data source contributing to the analysis, describe the following:
		a) Setting: Describe the study design and the underlying population, if possible. Describe the setting, locations, and relevant dates, including periods of recruitment, exposure, follow-up, and data collection, when available.
		b) Participants: Give the eligibility criteria, and the sources and methods of selection of participants. Report the sample size, and whether any power or sample size calculations were carried out prior to the main analysis.
		c) Describe measurement, quality control and selection of genetic variants.
		d) For each exposure, outcome, and other relevant variables, describe methods of assessment and diagnostic criteria for diseases.
		e) Provide details of ethics committee approval and participant informed consent, if relevant.
Assumptions	5	Explicitly state the three core IV assumptions for the main analysis (relevance, independence and exclusion restriction) as well assumptions for any additional or sensitivity analysis.
Statistical methods: main analysis	6	Describe statistical methods and statistics used.
		a) Describe how quantitative variables were handled in the analyses (i.e., scale, units, model).
		b) Describe how genetic variants were handled in the analyses and, if applicable, how their weights were selected.
		c) Describe the MR estimator (e.g. two-stage least squares, Wald ratio) and related statistics. Detail the included covariates and, in case of two-sample MR, whether the same covariate set was used for adjustment in the two samples.
		d) Explain how missing data were addressed.
		e) If applicable, indicate how multiple testing was addressed.
Assessment of assumption	7	Describe any methods or prior knowledge used to assess the assumptions or justify their validity.
Sensitivity analyses and additional analyses	8	Describe any sensitivity analyses or additional analyses performed (e.g. comparison of effect estimates from different approaches, independent replication, bias analytic techniques, validation of instruments, simulations)
Software and preregistration	9	a) Name statistical software and package(s), including version and settings used
		b) State whether the study protocol and details were pre_x0002_registered (as well as when and where)
Results
Descriptive data	10	a) Report the numbers of individuals at each stage of included studies and reasons for exclusion. Consider use of a flow diagram.
		b) Report summary statistics for phenotypic exposure(s), outcome(s), and other relevant variables (e.g. means, SDs, proportions).
		c) If the data sources include meta-analyses of previous studies, provide the assessments of heterogeneity across these studies.
		d) For two-sample MR: i. Provide justification of the similarity of the genetic variant-exposure associations between the exposure and outcome samples. ii. Provide information on the number of individuals who overlap between the exposure and outcome studies.
Main results	11	a) Report the associations between genetic variant and exposure, and between genetic variant and outcome, preferably on an interpretable scale.
		b) Report MR estimates of the relationship between exposure and outcome, and the measures of uncertainty from the MR analysis, on an interpretable scale, such as odds ratio or relative risk per SD difference.
		c) If relevant, consider translating estimates of relative risk into absolute risk for a meaningful time period.
		d) Consider plots to visualize results (e.g. forest plot, scatterplot of associations between genetic variants and outcome versus between genetic variants and exposure).
Assessment of assumptions	12	a) Report the assessment of the validity of the assumptions.
		b) Report any additional statistics (e.g., assessments of heterogeneity across genetic variants, such as I2, Q statistic or E-value).
Sensitivity analyses and additional analyses	13	a) Report any sensitivity analyses to assess the robustness of the main results to violations of the assumptions.
		b) Report results from other sensitivity analyses or additional analyses.
		c) Report any assessment of direction of causal relationship (e.g., bidirectional MR).
		d) When relevant, report and compare with estimates from non-MR analyse.
		e) Consider additional plots to visualize results (e.g., leave-one-out analyses).
Discussion
Key results	14	Summarize key results with reference to study objectives.
Limitations	15	Discuss limitations of the study, taking into account the validity of the IV assumptions, other sources of potential bias, and imprecision. Discuss both direction and magnitude of any potential bias and any efforts to address them.
Interpretation	16	a) Meaning: Give a cautious overall interpretation of results in the context of their limitations in comparison with other studies.
		b) Mechanism: Discuss underlying biological mechanisms that could drive a potential causal relationship between the investigated exposure and the outcome, and whether the gene-environment equivalence assumption is reasonable. Use causal language carefully, clarifying that IV estimates may provide causal effects only under certain assumptions.
		c) Clinical relevance: Discuss whether the results have clinical or public policy relevance, and to what extent they inform effect sizes of possible interventions.
Generalizability	17	Discuss the generalizability of the study results (a) to other populations, (b) across other exposure periods/timings, and (c) across other levels of exposure
Other information
Funding	18	Describe sources of funding and the role of funders in the present study and, if applicable, sources of funding for the databases and original study or studies on which the present study is based.
Data and data sharing	19	Provide the data used to perform all analyses or report where and how the data can be accessed, and reference these sources in the article. Provide the statistical code needed to reproduce the results in the article, or report whether the code is publicly accessible and if so, where.
Conflicts of Interest	20	All authors should declare all potential conflicts of interest.

## Sheet: Table S2
Table S2. The instruments of Gut microbiota/Immune cells related to Endometrial cancer
SNP for MR analysis between gut microbiota and EC with traditional defination
SNP	Effect allele	Other allele	Chrosome	Position	Beta	Effect allele frequency	Standard error	P value
rs10014686	A	G	4	174600551	0.203012	0.0943997	0.0407635	6.35053e-07
rs10848037	C	T	12	130703322	-0.159119	0.127875	0.0352394	6.32029e-06
rs1330325	A	T	9	21265197	0.108309	0.384105	0.0241615	7.36943e-06
rs17749540	T	C	22	37367536	-0.180458	0.148921	0.0357931	4.61461e-07
rs1952183	G	A	14	89844111	-0.10882	0.503271	0.023893	5.25118e-06
rs2871118	A	G	21	43184320	0.115938	0.276078	0.0258467	7.27063e-06
rs2901343	T	C	10	124457906	-0.111962	0.430528	0.0235768	2.04607e-06
rs4692552	C	T	4	169764631	0.122241	0.263581	0.0276396	9.74854e-06
rs62468608	C	A	7	78170494	0.172603	0.116486	0.0376243	4.48522e-06
rs6487088	T	C	12	20588382	-0.144302	0.819447	0.0309629	3.15456e-06
rs73443336	G	A	22	50940762	-0.140422	0.219245	0.029329	1.68616e-06
rs10024750	C	T	4	5647018	0.104523	0.56448	0.0224092	3.0969e-06
rs10752292	G	A	10	13347821	-0.118953	0.723602	0.0249473	1.85915e-06
rs11149171	C	T	13	25235968	-0.151409	0.153328	0.0307603	8.55648e-07
rs12623651	A	C	2	20684657	-0.106305	0.347274	0.0237186	7.39714e-06
rs17729286	A	C	4	1101148	-0.20256	0.0631649	0.0456221	8.99824e-06
rs2600191	G	T	3	9322660	-0.120105	0.621669	0.0243014	7.72041e-07
rs62578888	A	G	9	129613130	0.119345	0.576574	0.023481	3.72291e-07
rs6857075	C	T	4	146937467	0.104214	0.420368	0.0225159	3.6841e-06
rs731362	G	C	19	46585509	0.120347	0.322101	0.025477	2.31514e-06
rs75297146	C	T	8	3004551	-0.235198	0.0541269	0.0504335	3.10836e-06
rs78009268	T	C	13	96188617	0.20892	0.0776471	0.0418614	6.0144e-07
rs9466145	A	C	6	21677060	-0.105919	0.549311	0.0229081	3.77059e-06
rs10030640	T	G	4	18943713	-0.128384	0.378828	0.0280832	4.84127e-06
rs196229	A	C	10	121459517	-0.125691	0.624689	0.0283427	9.22123e-06
rs4854535	C	T	2	69180661	0.180561	0.835178	0.0377846	1.76435e-06
rs61818112	A	G	1	158039727	0.255213	0.0628904	0.0577492	9.90047e-06
rs75364852	C	A	18	60781820	0.138789	0.334498	0.0313763	9.71772e-06
rs77902968	A	G	2	233883133	-0.271803	0.0586389	0.0579941	2.77591e-06
rs10033190	C	T	4	118215853	0.0978871	0.751453	0.0207273	2.32815e-06
rs10843776	G	T	12	30699515	-0.0925649	0.257126	0.0205387	6.57958e-06
rs11786426	G	A	8	74432076	0.0825932	0.349925	0.0184837	7.8794e-06
rs13264085	A	T	8	127678826	0.0990459	0.195272	0.0223532	9.38219e-06
rs13391731	G	A	2	35127980	-0.0876715	0.321654	0.018818	3.17875e-06
rs1446585	G	A	2	136407479	0.115634	0.22812	0.0209054	3.1787e-08
rs6546996	G	A	2	75637636	-0.122113	0.125529	0.0273032	7.73231e-06
rs6780177	T	C	3	21647818	0.128654	0.133534	0.0263775	1.07481e-06
rs73412051	A	G	12	119644004	0.155347	0.0787996	0.0334656	3.45062e-06
rs77019567	A	T	12	102075870	0.177891	0.0533973	0.0397631	7.68517e-06
rs7761703	T	A	6	1602451	-0.155642	0.0990624	0.0311847	6.00741e-07
rs10036326	C	T	5	97764402	0.243854	0.0560296	0.0524561	3.33988e-06
rs10177566	T	C	2	5693299	-0.114082	0.26569	0.0253077	6.55059e-06
rs10981640	A	C	9	115897803	-0.13751	0.175092	0.0293968	2.90084e-06
rs11067048	C	G	12	114766393	0.106237	0.385316	0.0229073	3.52317e-06
rs11595913	C	T	10	103041525	0.143846	0.155412	0.0310632	3.64363e-06
rs11715674	C	T	3	60879866	-0.131686	0.22381	0.0265653	7.15632e-07
rs34613239	A	G	2	144005379	-0.152439	0.127172	0.033024	3.9121e-06
rs56085972	T	C	12	131366686	0.118396	0.241758	0.0260311	5.40943e-06
rs6026349	T	C	20	57125934	0.11175	0.328205	0.0236576	2.31662e-06
rs62003625	T	C	15	32404937	0.152732	0.131624	0.0330824	3.8986e-06
rs7320949	A	G	13	99788169	0.104578	0.336448	0.0236651	9.91236e-06
rs9847008	G	T	3	2063046	-0.122061	0.24817	0.0261533	3.05433e-06
rs10036326	C	T	5	97764402	0.245305	0.0560296	0.0524537	2.91662e-06
rs10177566	T	C	2	5693299	-0.113852	0.26569	0.0253065	6.83033e-06
rs10981640	A	C	9	115897803	-0.137657	0.175092	0.0293955	2.82811e-06
rs11067048	C	G	12	114766393	0.106493	0.385316	0.0229062	3.33392e-06
rs11595913	C	T	10	103041525	0.142761	0.155412	0.0310618	4.30644e-06
rs11715674	C	T	3	60879866	-0.132411	0.22381	0.0265641	6.20968e-07
rs17472393	G	C	13	100056531	0.229104	0.0601733	0.0517916	9.70839e-06
rs34613239	A	G	2	144005379	-0.15271	0.127172	0.0330225	3.75653e-06
rs56085972	T	C	12	131366686	0.118085	0.241758	0.0260299	5.71977e-06
rs6026349	T	C	20	57125934	0.112082	0.328205	0.0236565	2.15953e-06
rs62003625	T	C	15	32404937	0.152309	0.131624	0.0330808	4.14133e-06
rs9847008	G	T	3	2063046	-0.122326	0.24817	0.0261521	2.90405e-06
rs1005544	G	C	11	32008642	0.161728	0.1134	0.0296976	5.15661e-08
rs11072031	T	C	15	68758506	-0.148901	0.0987861	0.0319625	3.18332e-06
rs12581302	G	T	12	13348246	-0.0966547	0.251799	0.0217815	9.10251e-06
rs140443231	T	C	14	90818939	0.182799	0.0577511	0.0401808	5.37962e-06
rs17773250	C	T	9	18005232	-0.185004	0.0817904	0.0370825	6.06965e-07
rs28802725	C	T	8	57680098	-0.0921239	0.296617	0.0200213	4.1988e-06
rs36122201	C	T	3	118911215	-0.105631	0.339153	0.0198455	1.02252e-07
rs4445887	T	C	16	84374241	0.0933017	0.582047	0.0195838	1.8957e-06
rs4761660	T	G	12	95153387	-0.179485	0.934154	0.0377167	1.94775e-06
rs6570332	T	C	6	139673089	-0.0874929	0.671814	0.0196528	8.50988e-06
rs708686	T	C	19	5840619	-0.100234	0.279232	0.020876	1.57556e-06
rs73098536	G	A	3	62161920	0.148753	0.0838947	0.0333766	8.319e-06
rs7793841	A	G	7	108932001	-0.0933565	0.612525	0.019343	1.39035e-06
rs11986537	T	C	8	106880649	0.0995351	0.214997	0.0214947	3.64448e-06
rs144770262	A	G	9	34067427	0.165532	0.0673369	0.0363538	5.27932e-06
rs4110696	G	A	9	95579816	0.0844345	0.518612	0.0184397	4.6731e-06
rs4256405	C	T	6	92885622	-0.082761	0.548601	0.0179317	3.92423e-06
rs4351047	G	A	4	62600423	0.0971883	0.36675	0.0186404	1.84947e-07
rs4646215	G	A	13	99384317	0.14565	0.105415	0.0317535	4.49908e-06
rs6455422	G	A	6	169185589	0.111628	0.847819	0.0246764	6.0775e-06
rs6754311	C	T	2	136707982	0.155851	0.251472	0.020817	7.06245e-14
rs74394156	T	C	14	55666085	0.184682	0.0554058	0.0400043	3.90145e-06
rs8045380	T	C	16	85669376	0.103317	0.302176	0.0224329	4.11305e-06
rs10070311	T	C	5	79570013	0.0770744	0.385612	0.0171681	7.14273e-06
rs11782083	G	C	8	20549398	-0.0977091	0.198507	0.0213124	4.54817e-06
rs4075691	A	G	15	92002949	-0.100005	0.183928	0.0224933	8.74821e-06
rs4933278	T	C	10	84743037	-0.0835501	0.289958	0.0186185	7.20685e-06
rs550057	T	C	9	136146597	0.124063	0.25104	0.0191538	9.34335e-11
rs6099022	T	C	20	54747624	-0.104291	0.214132	0.02185	1.81461e-06
rs7147611	A	G	14	95024931	-0.0806524	0.656676	0.0178533	6.25717e-06
rs7831606	A	T	8	128455694	-0.1068	0.161897	0.0229995	3.42404e-06
rs10087056	A	C	8	130836118	-0.0821264	0.385711	0.0175093	2.726e-06
rs11219805	C	T	11	124718707	0.0953742	0.264005	0.0196637	1.23298e-06
rs237461	C	T	20	48033171	-0.0851996	0.290792	0.018658	4.96216e-06
rs2990682	G	C	1	13839382	0.0839398	0.304642	0.0185872	6.30212e-06
rs73966738	C	G	2	150948178	-0.127535	0.102434	0.0287267	9.01251e-06
rs10087056	A	C	8	130836118	-0.0821171	0.385711	0.0175092	2.73293e-06
rs11219805	C	T	11	124718707	0.0953695	0.264005	0.0196637	1.23441e-06
rs237461	C	T	20	48033171	-0.0851866	0.290792	0.018658	4.97834e-06
rs2990682	G	C	1	13839382	0.0839517	0.304642	0.0185872	6.2829e-06
rs73966738	C	G	2	150948178	-0.127521	0.102434	0.0287266	9.03271e-06
rs10087056	A	C	8	130836118	-0.0821294	0.385711	0.0175092	2.72366e-06
rs11219805	C	T	11	124718707	0.0953862	0.264005	0.0196637	1.22917e-06
rs237461	C	T	20	48033171	-0.085199	0.290792	0.018658	4.96283e-06
rs2990682	G	C	1	13839382	0.0839456	0.304642	0.0185872	6.29282e-06
rs73966738	C	G	2	150948178	-0.127534	0.102434	0.0287267	9.01423e-06
rs10101109	T	C	8	16087631	-0.0984235	0.690771	0.0218861	6.88956e-06
rs12110522	T	A	6	153263149	0.0916145	0.363316	0.0206942	9.55216e-06
rs1549206	A	G	5	180541589	-0.099745	0.536254	0.019963	5.83801e-07
rs3003597	G	C	9	130977520	-0.100342	0.643596	0.0210076	1.78413e-06
rs73812271	T	C	5	179860451	0.119733	0.195388	0.0253437	2.30812e-06
rs78677736	C	T	4	73807786	-0.127232	0.151993	0.0282087	6.47112e-06
rs9809140	G	A	3	19519043	-0.0966639	0.693402	0.0217291	8.64359e-06
rs10106275	A	G	8	89046119	-0.10823	0.436153	0.0233126	3.44129e-06
rs111604729	T	C	15	42769334	-0.19557	0.0848386	0.0430737	5.61606e-06
rs11969660	T	C	6	14395373	0.169314	0.110762	0.0369647	4.64022e-06
rs12913822	A	T	15	100284194	0.133192	0.230806	0.0296207	6.90486e-06
rs12932210	T	G	16	8611717	0.149553	0.219233	0.0294764	3.90272e-07
rs1572504	T	C	1	219859210	0.137725	0.211309	0.0287283	1.63442e-06
rs28577018	G	A	4	29759187	0.248981	0.0574032	0.0508779	9.89581e-07
rs55834012	C	A	12	94200011	-0.11279	0.365659	0.0242025	3.15815e-06
rs7214893	A	G	17	76140308	0.120874	0.261969	0.0271018	8.19565e-06
rs10106275	A	G	8	89046119	-0.114781	0.43782	0.023154	7.14829e-07
rs111604729	T	C	15	42769334	-0.195978	0.0852083	0.0426563	4.34099e-06
rs11969660	T	C	6	14395373	0.170942	0.110506	0.036738	3.27116e-06
rs12923305	A	C	16	8625523	0.142402	0.229486	0.0286354	6.595e-07
rs1572504	T	C	1	219859210	0.134667	0.210831	0.0285797	2.45335e-06
rs28577018	G	A	4	29759187	0.243328	0.0573578	0.0505872	1.5088e-06
rs4924450	A	G	15	40597229	0.11646	0.705191	0.0259694	7.30895e-06
rs55834012	C	A	12	94200011	-0.111296	0.365609	0.0241032	3.88476e-06
rs10107806	T	G	8	137354052	0.115277	0.196455	0.0259646	9.0059e-06
rs341677	T	C	8	2737997	0.17942	0.077581	0.0388421	3.8519e-06
rs34169081	C	T	9	28794806	-0.170687	0.0861256	0.0372304	4.54826e-06
rs3770472	C	T	2	217558735	0.114616	0.255707	0.0248391	3.94309e-06
rs417265	G	A	3	41099059	-0.0985103	0.686181	0.022244	9.48378e-06
rs80274999	G	C	3	14356566	0.161944	0.0971929	0.0359709	6.72949e-06
rs10113323	G	A	8	59554706	0.0795663	0.295397	0.0179591	9.40536e-06
rs12197028	G	A	6	102128843	0.14457	0.0859036	0.0321715	6.99868e-06
rs12415307	G	A	10	103076252	-0.086919	0.289391	0.018389	2.28208e-06
rs2107539	T	C	17	34322610	-0.0987778	0.243401	0.0218485	6.15358e-06
rs36720	C	T	19	16567351	-0.0794064	0.306358	0.0176958	7.2127e-06
rs3785822	A	G	17	59556923	0.0994099	0.178193	0.021117	2.50677e-06
rs61798216	G	A	4	36459051	-0.129122	0.113551	0.0264682	1.06958e-06
rs74949229	A	G	10	9526946	-0.139551	0.0939624	0.0283751	8.7407e-07
rs840787	G	C	2	65775890	-0.0765503	0.372348	0.0167178	4.67308e-06
rs1011345	C	T	2	173856545	-0.23966	0.0786334	0.052948	6.00202e-06
rs10502943	C	A	18	49901001	-0.267815	0.0865447	0.0511794	1.66905e-07
rs12124525	T	C	1	76940156	-0.270616	0.0626426	0.0608933	8.82597e-06
rs3815679	T	C	2	170218643	0.213453	0.0941311	0.0476669	7.53406e-06
rs73040331	C	T	3	18454062	0.264744	0.0757948	0.0550116	1.4904e-06
rs79951774	T	G	3	189546969	-0.300379	0.0506578	0.0657398	4.89558e-06
rs10119693	A	G	9	21796791	-0.081408	0.436269	0.0172789	2.4602e-06
rs11037453	C	T	11	43521662	0.149524	0.0766041	0.0317478	2.48025e-06
rs11708946	A	C	3	31495219	-0.0909564	0.245621	0.0204953	9.08396e-06
rs227442	T	C	14	70447626	0.108916	0.186449	0.0225637	1.38576e-06
rs2291958	C	T	9	8376899	0.098199	0.227777	0.0221222	9.04084e-06
rs2721884	A	G	8	133534265	0.0940826	0.684244	0.018166	2.23025e-07
rs387171	A	G	15	24278595	-0.0772341	0.579698	0.0173479	8.50476e-06
rs62523331	G	A	8	103731962	0.124893	0.1408	0.0270739	3.96799e-06
rs6585011	A	G	10	112533963	0.0869271	0.260584	0.01948	8.10547e-06
rs72819063	A	G	5	177707736	-0.157902	0.0783343	0.0319381	7.65286e-07
rs795988	C	T	4	140747153	0.0819852	0.347452	0.0184011	8.37212e-06
rs7998315	A	G	13	73854666	-0.0861361	0.260547	0.0193946	8.94387e-06
rs838134	C	A	19	49257739	-0.0969861	0.291407	0.019652	8.00746e-07
rs9313811	T	G	5	158968834	-0.118995	0.185112	0.0227144	1.61668e-07
rs9518837	T	C	13	103433051	-0.086536	0.289397	0.0190852	5.78221e-06
rs10123164	T	C	9	36824996	0.137606	0.647324	0.0300273	4.59021e-06
rs10247831	G	A	7	11693688	0.133172	0.615183	0.0300588	9.40626e-06
rs117158611	G	C	6	69985869	0.29794	0.0507184	0.0666812	7.89057e-06
rs28368536	C	G	1	82519686	-0.221532	0.097132	0.0478625	3.68306e-06
rs310007	C	T	16	81473711	0.216045	0.100313	0.0485407	8.55496e-06
rs4868427	T	A	5	173992056	0.156136	0.721699	0.0322777	1.31643e-06
rs4922067	C	G	8	19464314	0.165669	0.211977	0.0355918	3.2447e-06
rs67887362	C	A	7	43236240	0.204196	0.117421	0.046059	9.27744e-06
rs746810	C	T	6	96490089	0.14337	0.718648	0.0321356	8.14205e-06
rs78014650	C	T	8	74447312	0.169601	0.170916	0.0379537	7.87254e-06
rs10137996	C	T	14	34477937	-0.188352	0.12928	0.03826	8.52508e-07
rs11770593	G	T	7	68894018	-0.127395	0.641414	0.0266178	1.7008e-06
rs12565327	A	G	1	176593524	-0.209365	0.0907588	0.046587	6.98744e-06
rs1285852	T	A	1	233287432	0.120344	0.626225	0.026745	6.80561e-06
rs12900979	T	C	15	92907122	0.11446	0.571587	0.0256081	7.83335e-06
rs3797248	A	G	5	53509186	-0.161285	0.147756	0.0354143	5.25807e-06
rs3885195	T	C	11	82371506	-0.150624	0.236902	0.0300582	5.41243e-07
rs4430574	A	G	12	125986360	0.195673	0.0993103	0.0429614	5.24808e-06
rs4772337	G	A	13	101525691	0.119468	0.640448	0.0269951	9.61963e-06
rs4902984	C	T	14	72550927	-0.256543	0.942811	0.0563626	5.32244e-06
rs55835510	A	T	5	107975937	0.158132	0.237475	0.0302849	1.77498e-07
rs6458025	C	T	6	37761715	-0.206994	0.899891	0.0452174	4.70034e-06
rs6909908	G	T	6	131801089	-0.227896	0.0759618	0.0493096	3.80544e-06
rs76722389	A	G	12	11335730	0.202999	0.112655	0.0432973	2.75216e-06
rs77062729	G	A	8	130410952	-0.234443	0.0814636	0.0486633	1.45253e-06
rs912	C	T	3	21028234	0.184344	0.109284	0.0411452	7.45337e-06
rs9818008	C	A	3	185014098	0.143936	0.801254	0.032187	7.75406e-06
rs10141037	C	G	14	22514273	0.159772	0.244527	0.034655	4.01994e-06
rs113902057	A	G	6	43432565	0.299015	0.0567913	0.0648057	3.94965e-06
rs11592751	T	C	10	112227473	0.144671	0.331134	0.0313611	3.96742e-06
rs1163447	A	C	3	109056751	-0.290113	0.0585783	0.0630046	4.13213e-06
rs13203138	C	A	6	164182151	-0.237483	0.129907	0.0511397	3.42036e-06
rs3107045	G	A	8	96792749	0.287782	0.938021	0.0649437	9.36881e-06
rs4633561	T	C	13	27038815	0.150745	0.675735	0.0320751	2.60483e-06
rs62221575	A	G	21	33157887	0.36411	0.0502981	0.0669086	5.27158e-08
rs6564810	A	C	16	74062244	0.141282	0.422613	0.0313588	6.6266e-06
rs73883469	T	A	3	179736753	0.206224	0.150288	0.0415054	6.74346e-07
rs79911813	G	A	4	110520951	0.21547	0.144992	0.0426749	4.43882e-07
rs10144174	A	T	14	83577146	-0.0936504	0.730158	0.0208602	7.14169e-06
rs12938892	G	A	17	10007092	-0.095204	0.36877	0.0208389	4.91079e-06
rs1811207	G	A	7	39816277	-0.117849	0.829355	0.0249058	2.2253e-06
rs4405810	T	C	2	45855171	-0.0909832	0.704113	0.0197315	4.00634e-06
rs62199113	T	A	20	59629320	0.107775	0.251897	0.021175	3.5862e-07
rs6596838	G	C	6	219474	0.185546	0.0607461	0.0384001	1.35224e-06
rs72833501	T	C	6	217062	0.190637	0.0579915	0.0391636	1.12907e-06
rs74500162	C	T	6	107573790	0.15339	0.0911572	0.0326079	2.55003e-06
rs77761288	A	G	4	163760671	-0.178567	0.0693629	0.0360015	7.0494e-07
rs10145379	G	T	14	38065813	0.169767	0.585952	0.0347573	1.03767e-06
rs12578852	T	C	12	108699774	-0.293991	0.0886438	0.0608828	1.3735e-06
rs1828518	T	C	16	78635193	-0.202383	0.82148	0.0449495	6.71724e-06
rs2432926	A	G	5	154996909	0.367179	0.051061	0.0767104	1.69671e-06
rs28681338	A	G	22	43881816	-0.25565	0.100041	0.0570272	7.36165e-06
rs34375501	C	T	19	31280754	-0.174622	0.237815	0.0394652	9.65735e-06
rs7070312	G	T	10	15798477	-0.208945	0.164993	0.0458115	5.09178e-06
rs10158939	A	G	1	242223343	0.0808326	0.375746	0.0174673	3.69857e-06
rs1023692	C	T	2	67868756	-0.0986975	0.771301	0.0198976	7.03982e-07
rs10836532	T	G	11	4745154	0.0839484	0.351076	0.0175508	1.72564e-06
rs11657406	T	G	17	7249870	-0.101748	0.166085	0.0218457	3.19968e-06
rs13283363	G	A	9	34842242	0.164596	0.0863951	0.0311082	1.2161e-07
rs2603095	T	G	4	177175752	-0.085223	0.743202	0.0186016	4.61691e-06
rs2698177	G	A	18	68747115	-0.171794	0.945889	0.036475	2.47806e-06
rs2807619	T	C	1	60448209	0.129912	0.0891517	0.0288403	6.65214e-06
rs28538857	T	C	15	87689365	0.176942	0.0530423	0.0392323	6.47962e-06
rs73098732	A	G	7	43503949	0.0995528	0.170003	0.0218817	5.37475e-06
rs74949229	A	G	10	9526946	0.147428	0.0938822	0.0284368	2.16689e-07
rs783253	C	T	17	72498434	-0.0834026	0.72146	0.0188586	9.75498e-06
rs9843097	T	C	3	150197676	0.0867737	0.240726	0.0190768	5.39931e-06
rs10158939	A	G	1	242223343	0.080857	0.375746	0.0174673	3.67349e-06
rs1023692	C	T	2	67868756	-0.0986518	0.771301	0.0198976	7.1233e-07
rs10836532	T	G	11	4745154	0.0838952	0.351076	0.0175508	1.75181e-06
rs11657406	T	G	17	7249870	-0.10175	0.166085	0.0218457	3.19777e-06
rs13283363	G	A	9	34842242	0.164662	0.0863951	0.0311082	1.20183e-07
rs2603095	T	G	4	177175752	-0.0852199	0.743202	0.0186016	4.62037e-06
rs2698177	G	A	18	68747115	-0.171532	0.945889	0.0364749	2.5669e-06
rs2807619	T	C	1	60448209	0.129821	0.0891517	0.0288402	6.75147e-06
rs28538857	T	C	15	87689365	0.176793	0.0530423	0.0392322	6.59621e-06
rs73098732	A	G	7	43503949	0.0995841	0.170003	0.0218816	5.33815e-06
rs74949229	A	G	10	9526946	0.147336	0.0938822	0.0284367	2.20486e-07
rs783253	C	T	17	72498434	-0.0834354	0.72146	0.0188585	9.67639e-06
rs9843097	T	C	3	150197676	0.0867353	0.240726	0.0190768	5.45107e-06
rs10158939	A	G	1	242223343	0.0808508	0.375746	0.0174673	3.67982e-06
rs1023692	C	T	2	67868756	-0.0987338	0.771301	0.0198976	6.97385e-07
rs10836532	T	G	11	4745154	0.0839359	0.351076	0.0175508	1.73173e-06
rs11657406	T	G	17	7249870	-0.101785	0.166085	0.0218457	3.17343e-06
rs13283363	G	A	9	34842242	0.164549	0.0863951	0.0311082	1.22613e-07
rs2603095	T	G	4	177175752	-0.0852399	0.743202	0.0186016	4.59675e-06
rs2698177	G	A	18	68747115	-0.171814	0.945889	0.0364749	2.47143e-06
rs2807619	T	C	1	60448209	0.12989	0.0891517	0.0288403	6.67526e-06
rs28538857	T	C	15	87689365	0.176927	0.0530423	0.0392322	6.4909e-06
rs73098732	A	G	7	43503949	0.0995352	0.170003	0.0218816	5.39523e-06
rs74949229	A	G	10	9526946	0.147441	0.0938822	0.0284367	2.16147e-07
rs783253	C	T	17	72498434	-0.0833995	0.72146	0.0188585	9.76212e-06
rs9843097	T	C	3	150197676	0.0867558	0.240726	0.0190768	5.42337e-06
rs10166236	A	G	2	42967871	-0.118275	0.125028	0.0260257	5.50562e-06
rs1109499	G	C	21	28126167	-0.0885771	0.253967	0.019507	5.60462e-06
rs113710653	T	C	21	47581835	0.128026	0.0952181	0.0277397	3.92633e-06
rs11979513	A	G	7	41250331	0.0994314	0.178196	0.0211827	2.67927e-06
rs12456364	A	G	18	71518679	-0.0726766	0.496351	0.0164463	9.91499e-06
rs12673975	A	G	7	21527320	-0.0775436	0.640623	0.0170789	5.61716e-06
rs13070029	T	C	3	42852207	0.0869101	0.239247	0.0192953	6.66169e-06
rs1363927	A	G	5	37861581	-0.119586	0.108679	0.0259413	4.0289e-06
rs1452703	A	G	3	5766901	0.0761138	0.375274	0.0168897	6.58958e-06
rs2236547	T	C	9	214864	0.0949108	0.182002	0.0213119	8.45158e-06
rs2448269	T	C	11	80099803	0.0958694	0.191151	0.0215746	8.84543e-06
rs366171	T	A	16	66906450	-0.0756702	0.390098	0.0168043	6.69902e-06
rs3863318	C	A	11	117811167	-0.0733528	0.56509	0.0164864	8.61562e-06
rs41265179	T	G	1	153601828	-0.186507	0.0513384	0.0419988	8.96377e-06
rs56238206	A	G	11	13918589	0.108593	0.144547	0.0235475	3.99489e-06
rs5767121	T	G	22	48762687	0.108883	0.132134	0.0240491	5.96723e-06
rs9542263	C	T	13	70868010	0.0747894	0.536238	0.0165338	6.08463e-06
rs1021440	G	A	9	94379045	-0.082971	0.345975	0.0181463	4.82328e-06
rs10820045	A	C	9	104830105	-0.16593	0.0554877	0.0370648	7.57835e-06
rs112057053	C	G	3	127211963	0.146038	0.102593	0.0292312	5.85449e-07
rs11873510	C	T	18	5850906	-0.123755	0.141555	0.0264539	2.89514e-06
rs190949005	G	A	2	56319707	-0.15371	0.0654208	0.0346341	9.07431e-06
rs303925	T	C	1	48503280	-0.0840401	0.375612	0.018326	4.52156e-06
rs4867356	C	T	5	31623146	0.100289	0.200103	0.0217126	3.85695e-06
rs59809293	A	C	2	33849581	-0.0830115	0.496053	0.0172003	1.39182e-06
rs67659622	A	G	8	142862278	0.0993576	0.362459	0.0195692	3.8294e-07
rs72677788	A	G	4	126550852	-0.184455	0.0587673	0.0372574	7.39015e-07
rs73240572	C	T	4	57505068	0.0856274	0.449863	0.0190584	7.02581e-06
rs75642318	G	A	11	112426121	-0.127782	0.118722	0.0277418	4.10257e-06
rs9304475	T	C	18	22785354	-0.087747	0.44926	0.0172424	3.59898e-07
rs9684138	T	C	4	38287192	-0.0906092	0.525204	0.0190192	1.89713e-06
rs10215754	A	T	7	125473561	-0.281229	0.0822323	0.0607097	3.61532e-06
rs10744662	A	G	12	4915208	-0.156201	0.575063	0.0327887	1.89912e-06
rs10970830	A	G	9	32185642	-0.239556	0.151052	0.0474534	4.45908e-07
rs111426764	C	T	6	25009041	0.26676	0.0852397	0.0594674	7.26364e-06
rs116556966	G	T	2	76664959	-0.34057	0.0557446	0.0759125	7.24554e-06
rs11773071	C	A	7	46988659	0.302229	0.0712546	0.0654044	3.8204e-06
rs12889912	T	C	14	92147845	0.305615	0.0702881	0.0686014	8.39153e-06
rs1430034	A	C	2	38027626	0.159836	0.534722	0.0359588	8.79073e-06
rs2393782	G	C	10	63670859	-0.251445	0.882328	0.0521962	1.45511e-06
rs2717057	T	C	2	58127907	0.154812	0.368137	0.0342997	6.37594e-06
rs4809943	T	A	20	52501768	0.227713	0.12321	0.050323	6.0386e-06
rs496238	T	C	13	101977785	-0.172436	0.425584	0.0338549	3.51706e-07
rs58346872	G	T	4	111325310	0.284244	0.0944562	0.0632075	6.89212e-06
rs58668331	C	G	19	6653399	0.185454	0.294386	0.0394933	2.65518e-06
rs62210593	T	C	20	34004767	-0.148033	0.548709	0.0328515	6.6019e-06
rs66535021	C	T	1	112065476	-0.188592	0.262079	0.038093	7.38952e-07
rs73188646	T	C	8	6032988	-0.362916	0.0501089	0.0769855	2.42805e-06
rs74904967	A	G	1	116021610	-0.230223	0.135786	0.0518088	8.84211e-06
rs10234541	T	C	7	148273411	0.119186	0.137348	0.0266965	8.02561e-06
rs10460443	A	G	2	241089267	0.117109	0.790512	0.024666	2.05629e-06
rs117817822	G	A	20	23561732	-0.14128	0.0844267	0.0319375	9.70464e-06
rs12577679	C	T	11	95853099	0.0926297	0.249141	0.0205514	6.56832e-06
rs17276797	T	A	13	103759453	-0.0993935	0.232366	0.0212968	3.05542e-06
rs17639938	C	G	2	208617482	-0.104084	0.253379	0.021161	8.7139e-07
rs1844921	C	T	12	40587702	0.0850511	0.463661	0.0180266	2.38063e-06
rs386190	G	A	5	31692115	0.085617	0.660435	0.0192843	9.00696e-06
rs4861985	T	A	4	182487712	-0.129376	0.104904	0.0292805	9.93793e-06
rs6772892	G	T	3	150737619	-0.0877806	0.401758	0.0188284	3.12933e-06
rs7964677	G	A	12	95152877	-0.162048	0.937754	0.0366847	9.9938e-06
rs10236678	A	G	7	134549927	0.132083	0.747711	0.0280604	2.51273e-06
rs11074766	T	C	16	26304777	0.129592	0.243533	0.0284218	5.1249e-06
rs1182140	G	A	7	2964863	-0.140384	0.801962	0.0309599	5.777e-06
rs4424244	C	T	8	74434869	0.121141	0.352337	0.025352	1.76721e-06
rs6778836	A	T	3	168587709	-0.125347	0.72267	0.0266924	2.65317e-06
rs75202637	G	A	4	163822623	0.261818	0.0637073	0.0579151	6.16315e-06
rs7790846	G	A	7	50424061	-0.120812	0.722492	0.0266529	5.82047e-06
rs7990301	T	C	13	34382060	0.110457	0.53636	0.0237395	3.27318e-06
rs9290954	A	G	3	190548613	-0.121916	0.275765	0.0273473	8.27073e-06
rs10236678	A	G	7	134549927	0.134283	0.747711	0.0280654	1.71281e-06
rs11074766	T	C	16	26304777	0.130159	0.243533	0.0284269	4.67793e-06
rs1182140	G	A	7	2964863	-0.140145	0.801962	0.0309654	6.01492e-06
rs4352232	G	C	2	88848180	-0.128058	0.316327	0.0266047	1.48399e-06
rs4424244	C	T	8	74434869	0.121481	0.352337	0.0253566	1.66026e-06
rs6761789	G	T	2	145252729	0.2182	0.0701702	0.0489312	8.22211e-06
rs6778836	A	T	3	168587709	-0.126056	0.72267	0.0266972	2.33905e-06
rs74412941	C	A	2	200913546	-0.225163	0.0628039	0.0506251	8.68152e-06
rs75202637	G	A	4	163822623	0.263588	0.0637073	0.0579255	5.3528e-06
rs7790846	G	A	7	50424061	-0.121291	0.722492	0.0266576	5.36572e-06
rs7990301	T	C	13	34382060	0.110327	0.53636	0.0237438	3.37513e-06
rs1023692	C	T	2	67868756	0.0981321	0.771282	0.0197908	7.10467e-07
rs10833110	A	C	11	19450687	-0.0754361	0.346437	0.0169338	8.39904e-06
rs11940931	A	G	4	177181357	0.0905641	0.742659	0.0184746	9.48202e-07
rs34566098	G	A	10	126860657	0.171436	0.0538268	0.0380948	6.78725e-06
rs74949229	A	G	10	9526946	-0.143121	0.0938701	0.0282841	4.18984e-07
rs7794348	A	G	7	138966254	0.160069	0.0548254	0.0354861	6.45949e-06
rs1023692	C	T	2	67868756	0.0996966	0.771282	0.0197632	4.54571e-07
rs10766557	C	G	11	19447547	-0.0761699	0.346886	0.0169137	6.68609e-06
rs12675379	C	T	8	117505928	0.0754169	0.515953	0.0165522	5.206e-06
rs34566098	G	A	10	126860657	0.174315	0.0538268	0.0380417	4.60106e-06
rs674292	C	T	8	60881849	0.073504	0.387016	0.0165031	8.43093e-06
rs74949229	A	G	10	9526946	-0.140267	0.0938701	0.0282447	6.82989e-07
rs7794348	A	G	7	138966254	0.161442	0.0548254	0.0354367	5.21872e-06
rs1023692	C	T	2	67868756	0.0996851	0.771282	0.0197632	4.55956e-07
rs10766557	C	G	11	19447547	-0.076171	0.346886	0.0169137	6.68403e-06
rs12675379	C	T	8	117505928	0.0754182	0.515953	0.0165522	5.20411e-06
rs34566098	G	A	10	126860657	0.174315	0.0538268	0.0380417	4.60082e-06
rs674292	C	T	8	60881849	0.0734952	0.387016	0.0165032	8.45209e-06
rs74949229	A	G	10	9526946	-0.140257	0.0938701	0.0282447	6.84249e-07
rs7794348	A	G	7	138966254	0.161458	0.0548254	0.0354367	5.2081e-06
rs10276776	A	G	7	154592769	0.207054	0.0554953	0.0413744	5.6038e-07
rs11768363	C	T	7	147419683	-0.0938038	0.640847	0.02019	3.38342e-06
rs12724599	T	C	1	202045541	0.092649	0.32024	0.0205377	6.44696e-06
rs1688043	T	C	19	35553341	0.158759	0.919366	0.0358258	9.36148e-06
rs34196897	A	G	12	45843593	0.192718	0.0541149	0.042692	6.35694e-06
rs35334318	C	G	20	10124075	0.14498	0.103231	0.0320708	6.16619e-06
rs6852392	T	C	4	29441154	0.0834404	0.513342	0.0187833	8.9017e-06
rs10281779	G	A	7	884704	0.108871	0.429621	0.0231234	2.49847e-06
rs10911039	G	A	1	182194093	0.145854	0.159331	0.0316024	3.92559e-06
rs12697058	C	T	5	67335548	-0.111505	0.596969	0.0249869	8.09948e-06
rs12809872	T	C	12	130862390	-0.166807	0.160398	0.0317329	1.46753e-07
rs1580572	T	A	3	67392138	0.12447	0.24215	0.0268435	3.53681e-06
rs2449506	C	T	8	98791018	-0.150144	0.150276	0.0318987	2.51488e-06
rs303729	G	C	9	14438751	0.141678	0.843436	0.0318804	8.82806e-06
rs4943000	C	T	13	31631553	0.108843	0.584513	0.0235487	3.80033e-06
rs1035637	G	A	8	3925283	0.0835739	0.65561	0.0185211	6.4112e-06
rs17507951	A	T	5	31836038	0.147009	0.0808123	0.0327317	7.07779e-06
rs2605503	T	C	10	68372621	-0.0806683	0.524082	0.0176144	4.65715e-06
rs28376149	T	C	4	187448960	0.157775	0.0975091	0.0309694	3.49606e-07
rs3007222	T	G	13	105888869	-0.129043	0.122992	0.028681	6.81923e-06
rs3103001	A	G	6	159257260	-0.143232	0.0795639	0.03221	8.71571e-06
rs58045871	A	G	6	113786052	-0.0929431	0.331563	0.0184464	4.69101e-07
rs6461301	T	G	7	17192045	-0.119584	0.141321	0.025812	3.60615e-06
rs71492034	G	A	9	12307408	0.110016	0.157811	0.0242636	5.78194e-06
rs7298214	G	A	12	2053076	0.0812445	0.49855	0.01747	3.31104e-06
rs935417	T	A	2	239062898	-0.0927844	0.725202	0.0209782	9.73862e-06
rs10404584	T	C	19	15301449	0.132517	0.181561	0.0285225	3.38354e-06
rs10761245	T	C	9	96387675	-0.0983934	0.494124	0.0220912	8.42968e-06
rs11694441	A	C	2	119541381	-0.149789	0.125998	0.0337367	8.99777e-06
rs11744900	G	A	5	141949123	-0.140837	0.174459	0.0296482	2.0314e-06
rs1206113	T	C	6	97442712	-0.167094	0.108426	0.0359956	3.44919e-06
rs12064418	T	C	1	16761962	0.148588	0.162888	0.0333745	8.50205e-06
rs1249137	T	C	10	79990400	0.0997535	0.375257	0.0224173	8.59307e-06
rs1400577	G	A	16	73551996	-0.106378	0.600237	0.0223735	1.9879e-06
rs3892326	C	T	21	43018030	-0.123996	0.479803	0.0240164	2.43042e-07
rs4903903	C	T	14	80634365	0.104822	0.337698	0.0233032	6.85377e-06
rs74520302	G	A	8	5416476	-0.220634	0.0530404	0.0499474	9.99304e-06
rs75005855	A	T	1	175381699	-0.232258	0.0546038	0.0511301	5.55946e-06
rs76752365	C	G	3	118350858	-0.146265	0.136027	0.0322166	5.62378e-06
rs77655905	A	G	10	126611387	0.163245	0.104456	0.036351	7.09579e-06
rs10829629	T	C	10	131571972	0.0813715	0.442907	0.0171055	1.96454e-06
rs111585182	T	G	22	45821518	-0.159958	0.0667949	0.0356824	7.36586e-06
rs12028677	T	C	1	112076856	-0.108937	0.158462	0.0236079	3.94158e-06
rs12192901	A	G	6	1263359	0.112476	0.170872	0.0238178	2.33137e-06
rs13381124	G	A	18	25506994	0.14335	0.0754167	0.0323427	9.32643e-06
rs57119184	T	C	3	69163936	0.0878396	0.280027	0.0197668	8.83843e-06
rs60475061	A	G	6	5787678	-0.117157	0.12546	0.026068	6.98063e-06
rs67032605	G	A	9	1046539	0.119297	0.138057	0.0262192	5.36472e-06
rs7962165	G	T	12	87292283	-0.0956743	0.770098	0.0206046	3.42802e-06
rs1042840	C	T	11	102814110	-0.189953	0.245867	0.0421483	6.58192e-06
rs4793180	T	C	17	43121308	-0.209751	0.185396	0.0473993	9.63608e-06
rs4814260	T	A	20	13775032	-0.178894	0.382312	0.0389757	4.43495e-06
rs72656234	A	G	13	109730036	-0.364852	0.0650805	0.0753615	1.28954e-06
rs1044858	C	G	5	178954098	0.242648	0.183805	0.0526257	4.01059e-06
rs6020721	G	T	20	49367076	-0.183345	0.341522	0.0405327	6.08554e-06
rs62075885	A	G	17	76526048	0.206123	0.27205	0.0435565	2.21981e-06
rs6440148	T	C	3	142870821	-0.209178	0.21943	0.0470527	8.76436e-06
rs10450862	C	A	13	84559899	-0.21105	0.0778308	0.0453149	3.20217e-06
rs11096868	C	T	4	37348193	0.126432	0.237129	0.0285266	9.3332e-06
rs116972192	T	C	13	58186232	0.248924	0.063091	0.0539308	3.91916e-06
rs12976637	T	C	19	53801863	0.115678	0.365588	0.0257269	6.91225e-06
rs2026546	T	G	9	37733013	-0.118308	0.324824	0.0260387	5.53224e-06
rs2411041	A	G	17	74913863	0.157338	0.145481	0.0355172	9.42697e-06
rs2838820	C	T	21	46646005	0.10754	0.594867	0.0242173	8.96904e-06
rs35946101	C	T	6	3931188	0.18959	0.167798	0.0398602	1.97103e-06
rs4857402	G	A	3	98294454	0.11308	0.435752	0.0243962	3.56681e-06
rs7030947	A	G	9	80141674	0.111938	0.64088	0.0247631	6.17358e-06
rs7099427	T	C	10	126578768	0.127257	0.759359	0.0279703	5.37204e-06
rs10455532	G	A	6	92883361	-0.0769356	0.552534	0.0167272	4.23658e-06
rs10873640	T	C	15	24025547	0.0909807	0.759057	0.0201028	6.01738e-06
rs11732081	T	C	4	62600906	0.0783349	0.364727	0.0174252	6.9406e-06
rs12657170	C	T	5	79643369	0.0785189	0.46418	0.0167389	2.72151e-06
rs1546579	T	C	1	61319955	-0.0772113	0.405264	0.0172048	7.19737e-06
rs182549	T	C	2	136616754	-0.153278	0.755025	0.0196365	5.91372e-15
rs34823013	G	T	19	552579	-0.0869105	0.661291	0.0194389	7.78729e-06
rs4472164	G	A	4	168344708	-0.125369	0.103173	0.0275371	5.29496e-06
rs4859454	T	C	4	77541509	0.122763	0.114125	0.0263015	3.04838e-06
rs61939486	C	T	12	119663906	-0.110897	0.148052	0.0243794	5.39476e-06
rs74452406	T	C	3	63012872	-0.175989	0.0723787	0.0339529	2.17947e-07
rs77432108	T	A	8	74446780	0.0957298	0.183749	0.0215477	8.88376e-06
rs10455532	G	A	6	92883361	-0.0769154	0.552534	0.0167272	4.26097e-06
rs10873640	T	C	15	24025547	0.0909746	0.759057	0.0201027	6.0257e-06
rs11732081	T	C	4	62600906	0.0783377	0.364727	0.0174251	6.93518e-06
rs12657170	C	T	5	79643369	0.0785084	0.46418	0.0167389	2.72976e-06
rs1546579	T	C	1	61319955	-0.0772188	0.405264	0.0172048	7.18218e-06
rs182549	T	C	2	136616754	-0.153302	0.755025	0.0196364	5.85582e-15
rs34823013	G	T	19	552579	-0.0869075	0.661291	0.0194389	7.79248e-06
rs4472164	G	A	4	168344708	-0.125353	0.103173	0.027537	5.31006e-06
rs4859454	T	C	4	77541509	0.122758	0.114125	0.0263014	3.05125e-06
rs61939486	C	T	12	119663906	-0.110859	0.148052	0.0243793	5.43506e-06
rs74452406	T	C	3	63012872	-0.176051	0.0723787	0.0339528	2.15818e-07
rs77432108	T	A	8	74446780	0.0957041	0.183749	0.0215476	8.93282e-06
rs10455532	G	A	6	92883361	-0.0769908	0.552592	0.0167217	4.1397e-06
rs10873640	T	C	15	24025547	0.0909496	0.759129	0.0200943	6.007e-06
rs11732081	T	C	4	62600906	0.0774997	0.364923	0.0174123	8.55231e-06
rs12657170	C	T	5	79643369	0.0770323	0.464323	0.0167241	4.1034e-06
rs182549	T	C	2	136616754	-0.152231	0.754899	0.0196209	8.5872e-15
rs4472164	G	A	4	168344708	-0.125655	0.103149	0.0275202	4.97346e-06
rs4859454	T	C	4	77541509	0.120463	0.114251	0.0262743	4.54372e-06
rs61939486	C	T	12	119663906	-0.108607	0.147975	0.0243638	8.28371e-06
rs72993945	A	G	18	77284465	-0.0818989	0.334215	0.0181838	6.67006e-06
rs74452406	T	C	3	63012872	-0.171486	0.0721825	0.0340129	4.61197e-07
rs10506461	A	G	12	63451202	-0.155664	0.301291	0.0346141	6.88788e-06
rs11630244	G	A	15	60021637	0.245762	0.905194	0.0532982	4.00594e-06
rs12512757	A	T	4	166271012	-0.149671	0.324977	0.0334506	7.66347e-06
rs13427801	G	C	2	206021333	-0.172209	0.667405	0.0335886	2.94385e-07
rs17453521	A	G	2	9711055	-0.249613	0.105451	0.0536054	3.2164e-06
rs4861647	C	T	4	185874675	0.208894	0.150116	0.044876	3.24121e-06
rs56249713	C	T	18	67533332	0.143906	0.418761	0.0323284	8.532e-06
rs57711736	A	G	2	172460954	-0.154629	0.288477	0.0348695	9.22834e-06
rs59340188	T	C	18	74766684	0.321324	0.072011	0.0616893	1.90123e-07
rs62555927	G	A	9	33875214	-0.340244	0.0606565	0.0714205	1.89834e-06
rs722497	T	C	1	30172044	-0.152155	0.431651	0.0316192	1.49351e-06
rs7334864	A	G	13	30941441	0.159013	0.340897	0.0346593	4.47749e-06
rs76631862	T	G	3	193922574	-0.303243	0.0707669	0.0683874	9.2415e-06
rs8176645	A	T	9	136149500	-0.253949	0.302548	0.0337764	5.54034e-14
rs9525230	G	A	13	114827500	-0.153082	0.65034	0.0335192	4.94798e-06
rs9848175	G	A	3	8743076	0.315157	0.0591492	0.068015	3.5928e-06
rs10507465	C	T	13	38463552	-0.138846	0.246811	0.0297754	3.11491e-06
rs10895784	G	A	11	105046839	0.120849	0.620468	0.0257314	2.64567e-06
rs11144350	G	A	9	77862854	-0.138537	0.729889	0.0293727	2.39882e-06
rs12941005	C	T	17	29755009	-0.191666	0.0966268	0.0424365	6.28565e-06
rs13257050	A	C	8	19029859	0.130366	0.720362	0.0287763	5.88886e-06
rs1533824	C	T	11	214169	0.137379	0.329647	0.0266454	2.52547e-07
rs16923154	G	A	12	20885931	0.208234	0.0875038	0.0440939	2.32939e-06
rs1792325	T	C	11	71113304	-0.130506	0.398715	0.028235	3.79843e-06
rs1860691	G	A	7	52336084	0.144272	0.183109	0.0322336	7.6112e-06
rs4717625	G	A	7	71508645	0.173645	0.142545	0.0359115	1.32899e-06
rs6664382	C	G	1	76089534	0.23184	0.935054	0.0507452	4.90751e-06
rs73653217	T	A	9	79442588	-0.174788	0.158435	0.0351909	6.80496e-07
rs10507465	C	T	13	38463552	-0.139037	0.246739	0.0297642	2.99335e-06
rs10895784	G	A	11	105046839	0.120714	0.620207	0.0257173	2.68089e-06
rs11144350	G	A	9	77862854	-0.138725	0.729892	0.029365	2.31077e-06
rs12941005	C	T	17	29755009	-0.191247	0.096713	0.0424092	6.49596e-06
rs13257050	A	C	8	19029859	0.130578	0.720616	0.0287646	5.63738e-06
rs1533824	C	T	11	214169	0.137173	0.329499	0.0266356	2.60503e-07
rs16923154	G	A	12	20885931	0.208221	0.0874242	0.0440879	2.32551e-06
rs1792325	T	C	11	71113304	-0.13059	0.398815	0.0282128	3.67847e-06
rs1860691	G	A	7	52336084	0.144647	0.183397	0.0322121	7.10733e-06
rs4717625	G	A	7	71508645	0.173906	0.142567	0.0358947	1.26679e-06
rs6664382	C	G	1	76089534	0.232224	0.935113	0.0507396	4.72195e-06
rs73653217	T	A	9	79442588	-0.174748	0.158443	0.0351745	6.76293e-07
rs10507465	C	T	13	38463552	-0.139392	0.246811	0.0297758	2.84952e-06
rs10895784	G	A	11	105046839	0.120402	0.620468	0.0257318	2.88102e-06
rs11144350	G	A	9	77862854	-0.139074	0.729889	0.0293731	2.19331e-06
rs12941005	C	T	17	29755009	-0.19123	0.0966268	0.0424371	6.59962e-06
rs13257050	A	C	8	19029859	0.130267	0.720362	0.0287767	5.98738e-06
rs1533824	C	T	11	214169	0.137332	0.329647	0.0266458	2.55013e-07
rs16923154	G	A	12	20885931	0.208534	0.0875038	0.0440945	2.25342e-06
rs1792325	T	C	11	71113304	-0.130563	0.398715	0.0282354	3.7625e-06
rs1860691	G	A	7	52336084	0.144092	0.183109	0.032234	7.81544e-06
rs4717625	G	A	7	71508645	0.173023	0.142545	0.035912	1.45037e-06
rs6664382	C	G	1	76089534	0.2324	0.935054	0.0507459	4.65688e-06
rs73653217	T	A	9	79442588	-0.17487	0.158435	0.0351913	6.72567e-07
rs17049177	A	G	2	129915467	-0.258588	0.110945	0.0535065	1.34601e-06
rs616801	A	G	1	95011698	0.247295	0.119849	0.0525607	2.53952e-06
rs709159	A	C	3	12481203	-0.173838	0.759341	0.0373515	3.25384e-06
rs80010435	A	G	9	140767792	-0.324347	0.0533435	0.0726073	7.92735e-06
rs888195	C	G	12	2834412	0.165638	0.331862	0.0337323	9.09073e-07
rs9268614	G	T	6	32402778	-0.185915	0.200868	0.0401205	3.58804e-06
rs10733815	A	G	10	67316008	0.109025	0.776162	0.0228223	1.77821e-06
rs12116657	C	A	1	63034646	-0.111275	0.186049	0.0241536	4.08581e-06
rs2005874	T	C	19	46810991	0.171144	0.0856528	0.0335108	3.27105e-07
rs4237122	A	G	9	133313115	0.141557	0.105188	0.0307803	4.2461e-06
rs66722558	T	G	6	132090239	0.199748	0.0540512	0.0409473	1.0707e-06
rs702101	A	G	5	171276393	0.089625	0.623602	0.0198436	6.28498e-06
rs7631540	T	C	3	113830519	0.0825402	0.454162	0.0183823	7.11582e-06
rs10736970	C	T	10	3387104	-0.0913671	0.741775	0.0204744	8.10063e-06
rs12472147	G	A	2	124572776	-0.12833	0.855652	0.0264956	1.27615e-06
rs12979658	G	A	19	7892087	-0.0935377	0.263676	0.0203693	4.3882e-06
rs176564	G	A	7	105812525	-0.153345	0.910342	0.0337663	5.58933e-06
rs2282037	T	C	14	103588515	-0.102233	0.521969	0.0186334	4.09789e-08
rs77764206	C	T	12	91611380	0.197357	0.0504393	0.0423653	3.18588e-06
rs78791321	A	G	11	69317280	0.153283	0.0809067	0.0328393	3.04624e-06
rs10736970	C	T	10	3387104	-0.0913735	0.741775	0.0204744	8.08875e-06
rs12472147	G	A	2	124572776	-0.128329	0.855652	0.0264956	1.27632e-06
rs12979658	G	A	19	7892087	-0.0935379	0.263676	0.0203693	4.38789e-06
rs176564	G	A	7	105812525	-0.15334	0.910342	0.0337662	5.59263e-06
rs2282037	T	C	14	103588515	-0.102229	0.521969	0.0186333	4.10393e-08
rs77764206	C	T	12	91611380	0.197354	0.0504393	0.0423653	3.18707e-06
rs78791321	A	G	11	69317280	0.153277	0.0809067	0.0328393	3.04897e-06
rs11938983	T	C	4	98267549	0.108741	0.286213	0.0246128	9.95945e-06
rs12895134	A	G	14	94394345	0.0995816	0.555549	0.0224842	9.46926e-06
rs1969724	A	T	10	102679088	0.140115	0.841389	0.0307585	5.23051e-06
rs246783	G	A	5	75669542	0.109297	0.578874	0.0241709	6.1296e-06
rs4767918	C	T	12	121053044	0.109243	0.429707	0.0235722	3.57971e-06
rs6465823	T	G	7	101245403	0.120795	0.752057	0.0260739	3.60751e-06
rs7015972	A	G	8	18288003	0.106861	0.614719	0.0234094	4.99737e-06
rs72810711	C	G	2	27356929	0.114394	0.264503	0.0255503	7.56285e-06
rs891501	T	G	2	10086506	-0.156632	0.858175	0.0329211	1.9572e-06
rs115309509	A	T	3	179889361	0.219253	0.0614025	0.0491802	8.26674e-06
rs12895134	A	G	14	94394345	0.100351	0.555549	0.0226398	9.31493e-06
rs246783	G	A	5	75669542	0.113643	0.578874	0.0243381	3.02174e-06
rs2882286	G	A	4	161233662	0.141604	0.159538	0.030424	3.25001e-06
rs4767918	C	T	12	121053044	0.110515	0.429707	0.0237353	3.22203e-06
rs61407789	A	G	8	140442317	-0.202035	0.0689527	0.045734	9.97996e-06
rs6465823	T	G	7	101245403	0.121662	0.752057	0.0262543	3.58692e-06
rs704272	C	T	3	71706327	-0.156448	0.800105	0.0351462	8.53332e-06
rs72810711	C	G	2	27356929	0.114019	0.264503	0.0257271	9.3414e-06
rs891501	T	G	2	10086506	-0.157352	0.858175	0.0331489	2.0663e-06
rs10769221	A	G	11	5806426	0.141694	0.884538	0.027228	1.95073e-07
rs11087270	T	A	20	18906606	0.0873817	0.267415	0.0185193	2.3768e-06
rs12446334	G	A	16	81302009	0.0938369	0.275569	0.0200605	2.90116e-06
rs13119423	C	A	4	27850234	-0.110371	0.139999	0.0239806	4.17427e-06
rs34865636	T	A	19	45793832	-0.0828569	0.312404	0.0176735	2.75628e-06
rs55682375	A	G	9	21808352	-0.158559	0.0674229	0.0351998	6.65141e-06
rs56001939	C	T	2	54363878	-0.0795853	0.362334	0.0170427	3.01555e-06
rs7255582	T	C	19	35718076	-0.0800168	0.411214	0.0169181	2.24897e-06
rs10769221	A	G	11	5806426	0.141917	0.884538	0.0272287	1.8679e-07
rs11087270	T	A	20	18906606	0.0873411	0.267415	0.0185197	2.40394e-06
rs12446334	G	A	16	81302009	0.0936755	0.275569	0.020061	3.01879e-06
rs13119423	C	A	4	27850234	-0.11031	0.139999	0.0239812	4.22762e-06
rs34865636	T	A	19	45793832	-0.0829059	0.312404	0.017674	2.72077e-06
rs55682375	A	G	9	21808352	-0.158274	0.0674229	0.0352007	6.914e-06
rs56001939	C	T	2	54363878	-0.0794866	0.362334	0.0170431	3.10354e-06
rs6821986	T	C	4	181658296	-0.111752	0.118369	0.0252969	9.97923e-06
rs7255582	T	C	19	35718076	-0.0799638	0.411214	0.0169185	2.28524e-06
rs10769221	A	G	11	5806426	0.140943	0.884538	0.0272231	2.25073e-07
rs11087270	T	A	20	18906606	0.0886682	0.267415	0.0185159	1.67824e-06
rs12446334	G	A	16	81302009	0.0930476	0.275569	0.0200569	3.49796e-06
rs13119423	C	A	4	27850234	-0.110209	0.139999	0.0239763	4.29507e-06
rs34865636	T	A	19	45793832	-0.0825242	0.312404	0.0176704	3.00904e-06
rs55682375	A	G	9	21808352	-0.15804	0.0674229	0.0351935	7.10226e-06
rs56001939	C	T	2	54363878	-0.0790706	0.362334	0.0170397	3.47762e-06
rs7255582	T	C	19	35718076	-0.0809638	0.411214	0.0169151	1.69726e-06
rs10773460	G	A	12	128485584	0.0969704	0.743209	0.0199372	1.15159e-06
rs116114211	G	A	2	80212694	0.15199	0.0663195	0.0339721	7.67768e-06
rs12977498	G	A	19	41682274	0.0944185	0.300486	0.0197285	1.70221e-06
rs139469000	T	C	19	8441137	0.0853365	0.275477	0.0185864	4.40401e-06
rs2527213	A	C	7	158754493	0.140356	0.922361	0.031139	6.56273e-06
rs28640142	G	A	6	506781	-0.0882115	0.505558	0.0167762	1.45525e-07
rs4300413	A	C	18	45547811	-0.0828953	0.584233	0.0167474	7.43068e-07
rs4691694	G	A	4	161589224	0.148085	0.0698528	0.032866	6.61492e-06
rs66476925	C	G	7	21611399	-0.104325	0.20128	0.0205402	3.79348e-07
rs6757314	T	C	2	167195035	-0.12302	0.152019	0.0230206	9.09675e-08
rs77141557	A	C	10	18641481	0.117445	0.135494	0.0243127	1.36126e-06
rs10785016	T	G	12	73709018	-0.196819	0.395661	0.0443093	8.91556e-06
rs12047309	A	G	1	237628841	-0.357667	0.0820939	0.0808214	9.62638e-06
rs147524453	G	A	20	13579570	0.312689	0.119469	0.0690529	5.94727e-06
rs17661696	G	A	15	94877013	-0.248778	0.192569	0.0559368	8.68812e-06
rs3935551	G	A	8	22980972	-0.215591	0.529903	0.0460894	2.90171e-06
rs1078988	C	T	15	101902700	0.0941197	0.257608	0.0205927	4.8646e-06
rs115004061	T	C	3	109435292	-0.189927	0.0506658	0.0427222	8.76407e-06
rs118183316	A	G	12	31033659	0.177111	0.0517068	0.0400405	9.72055e-06
rs11851037	T	C	14	104767703	0.0814204	0.318062	0.0183917	9.55476e-06
rs34437635	T	C	22	45256730	0.161612	0.072341	0.0350091	3.90651e-06
rs62135856	A	G	2	38063634	0.153567	0.0776336	0.0333456	4.11818e-06
rs67396441	T	C	2	127772373	-0.0790905	0.385942	0.017334	5.04879e-06
rs6920861	C	T	6	167939982	-0.109842	0.253827	0.0209364	1.55043e-07
rs700801	A	G	9	79234647	0.100913	0.81313	0.0222596	5.80248e-06
rs72957980	A	C	4	106425877	-0.156555	0.0681974	0.0345402	5.82748e-06
rs74448867	G	A	8	3804085	0.169254	0.0685882	0.0349493	1.27991e-06
rs78335793	T	C	1	175415285	0.136187	0.0949423	0.0296879	4.49029e-06
rs8029854	C	T	15	77314031	-0.107635	0.811072	0.0224718	1.66983e-06
rs9884588	T	C	4	32616774	0.0829432	0.370832	0.0179741	3.93848e-06
rs1078988	C	T	15	101902700	0.0935179	0.257608	0.0205925	5.58907e-06
rs115004061	T	C	3	109435292	-0.189853	0.0506658	0.0427218	8.833e-06
rs2132254	T	C	3	65846859	0.0813722	0.5894	0.0183979	9.73773e-06
rs34437635	T	C	22	45256730	0.161911	0.072341	0.0350088	3.74857e-06
rs62135856	A	G	2	38063634	0.153113	0.0776336	0.0333452	4.39565e-06
rs67396441	T	C	2	127772373	-0.078774	0.385942	0.0173338	5.50569e-06
rs6920861	C	T	6	167939982	-0.111339	0.253827	0.0209362	1.04903e-07
rs700801	A	G	9	79234647	0.100962	0.81313	0.0222594	5.74155e-06
rs72957980	A	C	4	106425877	-0.15575	0.0681974	0.0345398	6.50457e-06
rs74448867	G	A	8	3804085	0.168486	0.0685882	0.0349489	1.42902e-06
rs78335793	T	C	1	175415285	0.134728	0.0949423	0.0296875	5.67399e-06
rs8029854	C	T	15	77314031	-0.109071	0.811072	0.0224716	1.21164e-06
rs9884588	T	C	4	32616774	0.0829817	0.370832	0.0179739	3.89717e-06
rs10832975	G	C	11	18743180	-0.112605	0.414205	0.0220272	3.18635e-07
rs11161562	G	C	1	85710312	-0.113617	0.260616	0.0243498	3.07029e-06
rs13109150	T	C	4	24054917	0.103254	0.671206	0.0228214	6.05527e-06
rs17696544	G	A	8	138933940	-0.161229	0.142327	0.0334158	1.40057e-06
rs2229594	T	C	9	104124664	0.124754	0.814794	0.0277787	7.08963e-06
rs4457100	G	A	5	173534877	0.124402	0.230483	0.0268351	3.55577e-06
rs61213519	T	A	8	84262265	-0.189805	0.0721578	0.0411906	4.06632e-06
rs10836532	T	G	11	4745154	-0.0802979	0.351034	0.017437	4.12404e-06
rs11578868	G	A	1	239437125	-0.14908	0.0850534	0.031022	1.54287e-06
rs11726764	A	C	4	107710360	0.149033	0.0662113	0.0330142	6.35522e-06
rs123043	A	C	4	16823900	-0.0768737	0.648591	0.0173449	9.33335e-06
rs12622085	G	A	2	170162682	0.0824475	0.302884	0.0184789	8.13057e-06
rs1850270	T	C	3	1661391	-0.0965044	0.206659	0.0213059	5.91319e-06
rs2105601	C	T	11	87666565	0.159891	0.0803458	0.0350485	5.06699e-06
rs225280	T	C	17	33976296	-0.0966503	0.816592	0.020892	3.72443e-06
rs2317916	C	T	13	112770727	0.0807651	0.630847	0.0172394	2.80064e-06
rs4721723	G	C	7	18760347	0.142582	0.0819166	0.0306241	3.22594e-06
rs4816989	G	A	21	26181265	-0.0798621	0.665608	0.017152	3.22196e-06
rs6830068	T	G	4	73711914	0.08881	0.217332	0.0199277	8.32671e-06
rs7000832	A	C	8	81956395	0.0829852	0.456351	0.0173216	1.66066e-06
rs7104786	T	C	11	2306168	0.0939107	0.432431	0.0186646	4.86684e-07
rs73044678	A	G	12	10874415	-0.16891	0.0554366	0.0370442	5.1234e-06
rs10836532	T	G	11	4745154	-0.0808891	0.351034	0.0174398	3.51464e-06
rs11726764	A	C	4	107710360	0.148769	0.0662113	0.0330195	6.62192e-06
rs123043	A	C	4	16823900	-0.0768331	0.648591	0.0173477	9.46632e-06
rs12622085	G	A	2	170162682	0.0817846	0.302884	0.0184818	9.63797e-06
rs1850270	T	C	3	1661391	-0.0957917	0.206659	0.0213093	6.94716e-06
rs2105601	C	T	11	87666565	0.158954	0.0803458	0.0350541	5.77284e-06
rs225280	T	C	17	33976296	-0.0972736	0.816592	0.0208953	3.23532e-06
rs2317917	G	T	13	112770689	0.08051	0.631045	0.0172368	2.99986e-06
rs4721723	G	C	7	18760347	0.143047	0.0819166	0.030629	3.00764e-06
rs4816989	G	A	21	26181265	-0.0789203	0.665608	0.0171547	4.21487e-06
rs6830068	T	G	4	73711914	0.0894719	0.217332	0.0199309	7.15224e-06
rs7000832	A	C	8	81956395	0.0840306	0.456351	0.0173243	1.2319e-06
rs7104786	T	C	11	2306168	0.0940162	0.432431	0.0186676	4.74525e-07
rs73044678	A	G	12	10874415	-0.170185	0.0554366	0.0370502	4.36176e-06
rs10848471	A	C	12	1510640	0.144177	0.205093	0.0306873	2.62374e-06
rs10961097	T	C	9	13514253	-0.149816	0.145585	0.0337994	9.31476e-06
rs113157937	T	C	3	62371898	0.213265	0.0862479	0.0456803	3.03191e-06
rs12474753	T	C	2	114128721	0.243283	0.0630051	0.0527119	3.92475e-06
rs12935244	C	A	16	62133341	-0.124334	0.363694	0.0241866	2.73867e-07
rs2368038	T	A	3	193755011	0.13135	0.226705	0.0293294	7.51929e-06
rs6590368	T	C	11	129090852	0.12484	0.755115	0.0277199	6.68091e-06
rs6731499	G	A	2	174711730	-0.114822	0.320232	0.0256509	7.59327e-06
rs75578397	A	T	8	60851737	0.177351	0.101482	0.0398192	8.43276e-06
rs9804152	C	T	1	158518939	-0.134336	0.741779	0.0275221	1.05535e-06
rs10854303	G	A	21	29126637	-0.101857	0.80931	0.0217912	2.95046e-06
rs11083824	G	C	19	46910130	0.0813916	0.65056	0.0179671	5.8976e-06
rs113638576	T	C	5	176756088	-0.115999	0.131189	0.0257425	6.6029e-06
rs11603389	G	C	11	130448209	0.128011	0.096049	0.0284243	6.682e-06
rs16848174	G	C	3	175195490	0.148535	0.0675263	0.0333148	8.25197e-06
rs17639446	C	A	17	48273903	-0.128672	0.121318	0.0281575	4.8839e-06
rs17706792	G	A	7	104500549	0.0880518	0.283512	0.0190049	3.60188e-06
rs315588	T	C	10	36487049	0.0972865	0.183821	0.0218412	8.41794e-06
rs366171	T	A	16	66906450	-0.0836442	0.391149	0.0171412	1.0624e-06
rs541877	G	A	11	102357529	0.0928494	0.209692	0.0205642	6.32881e-06
rs56238206	A	G	11	13918589	0.113252	0.144301	0.0240443	2.47529e-06
rs6910508	A	G	6	166531345	0.0819775	0.324371	0.0178218	4.22791e-06
rs9409512	A	G	9	97061771	0.0776497	0.400457	0.0170857	5.50107e-06
rs9663125	T	G	10	29866909	0.0764387	0.434982	0.0168408	5.65458e-06
rs1878735	A	C	9	109873993	-0.138437	0.169658	0.0296275	2.97433e-06
rs4245954	T	C	4	8868227	0.143728	0.168029	0.0301532	1.87366e-06
rs600038	C	T	9	136151806	-0.123423	0.209058	0.0273532	6.41555e-06
rs7148318	A	G	14	51325748	-0.107625	0.702401	0.0242863	9.35819e-06
rs72698095	G	C	4	183252248	-0.147336	0.162094	0.0328679	7.37161e-06
rs7851638	G	A	9	13793758	0.203009	0.917481	0.0421875	1.49385e-06
rs10862904	G	A	12	85018579	-0.0893192	0.474561	0.0195497	4.90459e-06
rs111452233	A	G	6	168150936	0.152257	0.135805	0.0284751	8.9402e-08
rs1137722	C	T	2	193015711	0.0967949	0.444609	0.0200587	1.39592e-06
rs11522665	T	G	11	10489428	0.205696	0.0501866	0.0457741	6.99889e-06
rs117675525	T	G	19	57147233	0.194145	0.0829501	0.0400209	1.22787e-06
rs12416788	G	A	11	107894312	-0.119958	0.163508	0.0260995	4.3036e-06
rs12443593	A	C	16	20676354	0.186202	0.0608208	0.040302	3.834e-06
rs2302675	A	G	16	54060498	0.0945071	0.296811	0.0213508	9.58191e-06
rs34558519	G	A	16	56645219	-0.201166	0.0562161	0.0424561	2.15617e-06
rs463212	C	T	5	100809936	-0.112837	0.184172	0.0250366	6.57892e-06
rs4733774	C	A	8	131196683	-0.100809	0.244434	0.0222193	5.70563e-06
rs4869373	C	G	5	96941137	0.18282	0.0617532	0.0410783	8.56625e-06
rs7380390	C	T	5	54891954	0.0951037	0.657837	0.0210174	6.03949e-06
rs10864073	C	T	1	214011756	-0.136479	0.115526	0.0306823	8.66194e-06
rs12041621	A	G	1	48554579	-0.128203	0.198693	0.026118	9.17242e-07
rs12131104	T	C	1	149889339	0.132729	0.161802	0.0298653	8.81916e-06
rs1884673	T	C	20	38517535	-0.149704	0.122825	0.0301141	6.65295e-07
rs34762184	A	G	3	50541769	-0.128822	0.141534	0.0285418	6.37791e-06
rs4884323	G	T	13	59810492	-0.0923593	0.398074	0.0200047	3.89539e-06
rs9865704	A	G	3	149080011	-0.145045	0.127359	0.0300178	1.35194e-06
rs10865362	T	C	2	67933923	-0.148284	0.798704	0.0334266	9.1607e-06
rs11068499	A	G	12	117892931	-0.162446	0.157012	0.0363579	7.89698e-06
rs12725104	G	A	1	65268226	0.154648	0.177096	0.0346941	8.2935e-06
rs17562516	A	T	17	48729781	-0.138735	0.301073	0.0292245	2.06256e-06
rs1861231	A	G	2	10455625	-0.153675	0.741502	0.0307644	5.87633e-07
rs35921003	C	A	8	83230206	-0.221321	0.0816795	0.0498049	8.84027e-06
rs3745098	T	G	19	52855303	0.128844	0.445331	0.0273926	2.55604e-06
rs4889373	G	A	16	81747602	0.129894	0.720261	0.0292585	9.01568e-06
rs73918563	C	T	20	59220861	-0.2743	0.0564855	0.0586406	2.90192e-06
rs10865362	T	C	2	67933923	-0.148048	0.798704	0.0333796	9.19529e-06
rs11068499	A	G	12	117892931	-0.163287	0.157012	0.0363068	6.87844e-06
rs12725104	G	A	1	65268226	0.15492	0.177096	0.0346453	7.76414e-06
rs17562516	A	T	17	48729781	-0.138562	0.301073	0.0291834	2.05477e-06
rs1861231	A	G	2	10455625	-0.154011	0.741502	0.0307211	5.35358e-07
rs35921003	C	A	8	83230206	-0.221395	0.0816795	0.0497349	8.52729e-06
rs3745098	T	G	19	52855303	0.128373	0.445331	0.0273541	2.69198e-06
rs4889373	G	A	16	81747602	0.130841	0.720261	0.0292173	7.5279e-06
rs73918563	C	T	20	59220861	-0.273973	0.0564855	0.0585581	2.8877e-06
rs10865362	T	C	2	67933923	-0.14827	0.798704	0.0333854	8.94748e-06
rs11068499	A	G	12	117892931	-0.16342	0.157012	0.036313	6.78515e-06
rs12725104	G	A	1	65268226	0.154981	0.177096	0.0346513	7.72855e-06
rs17562516	A	T	17	48729781	-0.13858	0.301073	0.0291885	2.05667e-06
rs1861231	A	G	2	10455625	-0.153882	0.741502	0.0307264	5.49594e-07
rs28740947	G	A	12	81344810	0.149563	0.200981	0.0338588	9.99564e-06
rs35921003	C	A	8	83230206	-0.22137	0.0816795	0.0497435	8.57817e-06
rs3745098	T	G	19	52855303	0.12849	0.445331	0.0273588	2.64694e-06
rs4889373	G	A	16	81747602	0.13065	0.720261	0.0292224	7.78984e-06
rs73918563	C	T	20	59220861	-0.273779	0.0564855	0.0585682	2.94633e-06
rs10869688	A	G	9	78690813	-0.131667	0.238254	0.0282923	3.25843e-06
rs11153641	C	T	6	117227284	-0.144528	0.206792	0.0300958	1.56872e-06
rs13235500	G	A	7	7822225	0.150679	0.190723	0.0331838	5.60616e-06
rs1901115	T	C	16	60407480	0.143701	0.799426	0.0300179	1.69137e-06
rs2610946	G	A	8	21139032	-0.167032	0.854692	0.0374381	8.13695e-06
rs2668320	T	C	12	32226658	0.12428	0.278342	0.0270266	4.25706e-06
rs28719561	C	T	4	7277846	0.209054	0.0837098	0.0455591	4.46173e-06
rs3892326	C	T	21	43018030	-0.118422	0.480188	0.0265076	7.91568e-06
rs41294029	T	C	10	5993461	0.207403	0.0817246	0.0463357	7.60211e-06
rs6003161	C	A	22	43745368	0.113075	0.525108	0.0246872	4.64316e-06
rs72679838	G	A	14	23119483	0.165144	0.125756	0.0369302	7.75674e-06
rs73242161	C	A	10	55325964	-0.246374	0.0557373	0.0526148	2.83269e-06
rs73447940	A	C	7	122783839	0.205148	0.101803	0.0405881	4.31749e-07
rs74064457	A	G	14	80660670	0.11913	0.339887	0.0258328	3.99598e-06
rs75955305	A	C	8	98899757	-0.192862	0.083372	0.0436049	9.73684e-06
rs9828991	T	A	3	104284483	-0.135924	0.7027	0.0270776	5.1725e-07
rs10898147	T	C	11	83335977	-0.136615	0.233233	0.0303855	6.92221e-06
rs116693483	T	G	2	75660834	0.281141	0.0563084	0.0600215	2.8133e-06
rs1685109	C	T	8	32211367	-0.198968	0.0893011	0.0448762	9.2627e-06
rs1985586	T	G	12	54496487	-0.113169	0.524115	0.0256005	9.8441e-06
rs56246718	G	C	4	184581820	0.142216	0.264851	0.0304435	2.99031e-06
rs62501151	T	G	8	23134901	-0.1337	0.274887	0.0291896	4.64097e-06
rs10900435	G	A	1	204973138	0.0958589	0.409844	0.0208596	4.31871e-06
rs112644714	G	A	6	10108495	0.178526	0.0896612	0.0401635	8.79017e-06
rs115534005	C	T	5	44055894	0.244256	0.0506183	0.0481471	3.91367e-07
rs12300342	G	A	12	61422160	0.109002	0.367899	0.0208365	1.6832e-07
rs12700345	G	C	7	22134585	-0.120102	0.179935	0.0260325	3.95862e-06
rs2791437	A	G	9	125844582	-0.126729	0.191182	0.026727	2.12032e-06
rs35630916	T	G	13	78731727	0.174552	0.0768958	0.0388198	6.90888e-06
rs10915295	G	T	1	5001488	0.134028	0.275814	0.0294005	5.14696e-06
rs112684584	A	T	8	75850745	0.169223	0.150902	0.0375402	6.55047e-06
rs13238712	G	T	7	49971101	0.242955	0.0659397	0.0539809	6.77144e-06
rs139790375	T	C	19	10126107	-0.190115	0.116364	0.0423962	7.31717e-06
rs2926850	C	A	5	153157228	-0.137501	0.35364	0.027646	6.5714e-07
rs4338887	A	G	18	4742876	-0.139221	0.304016	0.0289889	1.56657e-06
rs444953	C	T	17	32236051	0.140718	0.703915	0.0288332	1.05857e-06
rs61956724	T	C	13	66636200	-0.309637	0.0506604	0.0604889	3.07322e-07
rs6557756	A	C	8	24523301	0.126101	0.673768	0.0284315	9.19661e-06
rs71510947	G	A	1	13921657	-0.177112	0.139246	0.0387512	4.86584e-06
rs7671513	C	T	4	127662474	-0.127518	0.501559	0.0263971	1.3602e-06
rs9316496	A	G	13	51041880	0.159552	0.174774	0.035188	5.78003e-06
rs10924209	G	T	1	245645242	0.115394	0.16759	0.0258376	7.96547e-06
rs13420244	A	T	2	72335640	0.105911	0.178593	0.0225412	2.61999e-06
rs3013111	T	C	1	85649468	-0.110098	0.1438	0.0247826	8.8893e-06
rs6039702	G	A	20	10082476	0.116128	0.152188	0.0247658	2.74465e-06
rs62048493	A	G	16	80343094	0.162007	0.0676924	0.0354736	4.94797e-06
rs6426007	T	C	1	37537293	-0.0846257	0.697572	0.0187864	6.64903e-06
rs6750178	C	T	2	70556337	0.0821691	0.398652	0.0178983	4.41384e-06
rs74683729	C	T	7	144894559	-0.125204	0.11057	0.027942	7.43394e-06
rs76382119	A	G	3	52106828	0.103713	0.212828	0.0228542	5.67819e-06
rs12541342	G	A	8	4518456	0.093164	0.221209	0.0207363	7.02923e-06
rs404634	C	T	1	108511501	-0.104495	0.748588	0.0196008	9.75907e-08
rs56398621	T	C	1	88236250	0.102895	0.152007	0.023198	9.18607e-06
rs74448283	T	C	1	61523170	-0.13565	0.0895522	0.0294121	3.98714e-06
rs7479452	G	A	11	70654848	-0.0876759	0.246189	0.0195897	7.6192e-06
rs9560166	A	G	13	112349869	-0.0796989	0.599696	0.017251	3.83797e-06
rs10927575	C	G	1	13785516	0.120728	0.141584	0.0267334	6.30239e-06
rs11678512	C	T	2	106187246	-0.101888	0.219408	0.0212403	1.61115e-06
rs11933020	C	T	4	7805889	0.103443	0.246485	0.0203323	3.62561e-07
rs13060820	T	C	3	98120246	-0.165915	0.0723913	0.0361856	4.53749e-06
rs2184120	C	T	9	111788558	0.159484	0.0703719	0.0354557	6.85561e-06
rs2426807	C	T	20	58251131	-0.113657	0.143411	0.0255081	8.36074e-06
rs396720	T	C	8	59962804	0.0884819	0.717832	0.0197847	7.74031e-06
rs4268153	A	G	8	117542385	-0.132382	0.107514	0.029659	8.06408e-06
rs4775557	C	T	15	46844195	-0.18014	0.0607152	0.0387317	3.30381e-06
rs56105508	C	G	3	17852886	0.120423	0.127461	0.0269748	8.03346e-06
rs6922056	G	T	6	123544294	0.112878	0.804502	0.0222686	4.00068e-07
rs77362317	G	T	3	141078059	0.162865	0.0732534	0.0337338	1.37951e-06
rs79969063	C	A	5	71786401	-0.160806	0.0677792	0.0359854	7.87149e-06
rs10943378	A	G	6	77482882	0.0932157	0.198179	0.0205589	5.78518e-06
rs12598268	T	C	16	65088804	-0.160888	0.0704435	0.0324225	6.96929e-07
rs12661131	T	C	6	42007468	0.122143	0.109594	0.0266441	4.55625e-06
rs1447497	T	C	2	205402370	0.0901888	0.757996	0.0195661	4.03759e-06
rs2004833	T	G	2	44374984	0.078305	0.651453	0.0169375	3.77915e-06
rs28431837	A	G	16	86117606	0.102889	0.193058	0.0205544	5.56595e-07
rs35223586	G	A	17	1079174	-0.0792222	0.453392	0.0175504	6.36202e-06
rs68010592	G	A	4	8661140	-0.121611	0.10202	0.0269624	6.47092e-06
rs73232724	T	C	3	142541083	0.16743	0.0515544	0.0367396	5.18424e-06
rs79965903	G	A	4	182085946	0.138401	0.0738342	0.031028	8.17675e-06
rs857127	G	T	1	57201691	0.0749198	0.528904	0.0165775	6.20269e-06
rs10966460	G	A	9	24786605	0.174315	0.0654922	0.0390392	8.00159e-06
rs11957434	A	G	5	156575312	0.121838	0.183824	0.0248805	9.73392e-07
rs12332306	T	C	5	63111148	0.113209	0.252514	0.0221762	3.30819e-07
rs1362650	G	A	3	179137273	-0.09041	0.429872	0.019464	3.40094e-06
rs1443711	G	A	2	31394676	0.110108	0.290423	0.0239182	4.15363e-06
rs2055593	A	G	2	98992113	-0.112772	0.21357	0.0241344	2.97324e-06
rs2789623	G	A	10	8223518	0.113499	0.753944	0.023611	1.53177e-06
rs4897508	A	C	6	131630172	0.126348	0.138334	0.028377	8.48828e-06
rs62390586	C	G	5	174686892	-0.134288	0.237693	0.0252357	1.02998e-07
rs62493320	A	T	8	14707890	0.119161	0.179269	0.0253637	2.626e-06
rs73102812	T	C	3	61320539	0.162776	0.0882641	0.0344181	2.25237e-06
rs8015391	G	A	14	54954582	-0.0988055	0.296311	0.0215084	4.35228e-06
rs10987256	A	G	9	129125636	0.0927893	0.337754	0.0198888	3.0802e-06
rs11889243	G	A	2	241236588	0.106704	0.263771	0.0224718	2.0508e-06
rs12584973	G	C	13	88508812	0.0975005	0.34887	0.0210789	3.7369e-06
rs12872336	T	C	13	103063260	0.100709	0.313611	0.0209255	1.48876e-06
rs17106044	T	C	1	81610300	-0.130217	0.139117	0.0274453	2.0891e-06
rs17138993	T	C	16	6018669	0.152098	0.153671	0.0313647	1.23879e-06
rs6772892	G	T	3	150737619	-0.103149	0.40063	0.0199563	2.35711e-07
rs6796475	C	T	3	54188188	-0.110194	0.180737	0.0242923	5.7286e-06
rs75781806	T	C	9	10626347	0.133614	0.129968	0.0291959	4.72887e-06
rs11002091	C	T	10	78984504	0.0879087	0.379164	0.0195012	6.54865e-06
rs117632297	A	G	14	80463424	-0.172677	0.063938	0.0388452	8.77887e-06
rs13040204	G	A	20	57224053	0.117823	0.216899	0.0255187	3.89091e-06
rs1358421	A	G	2	49754547	0.0902218	0.351206	0.0197074	4.69309e-06
rs2660277	G	T	18	11010141	-0.0930074	0.449167	0.0188939	8.53937e-07
rs2717881	A	T	7	25210734	0.165026	0.926897	0.0370288	8.32328e-06
rs28706788	A	G	5	159575028	0.0829043	0.540016	0.0185813	8.1314e-06
rs2906787	C	T	7	112137676	0.172041	0.93652	0.0385918	8.27398e-06
rs35239958	C	T	3	144169280	0.0892958	0.320066	0.0199528	7.62847e-06
rs544964	G	A	19	37409561	-0.0849199	0.573552	0.0189097	7.09541e-06
rs66806908	G	C	3	196553260	0.136893	0.889921	0.03086	9.16721e-06
rs74413687	A	G	17	63315851	0.162183	0.0728206	0.0360487	6.8275e-06
rs8050653	G	A	16	82300059	-0.085848	0.434569	0.0193864	9.49914e-06
rs9805811	G	A	13	114744475	-0.0971784	0.730185	0.0208476	3.14118e-06
rs11028061	C	T	11	24628879	-0.0907211	0.683668	0.0198043	4.63018e-06
rs11759411	T	C	6	14295178	-0.0854129	0.584904	0.0189855	6.8323e-06
rs13106159	T	G	4	28031535	0.192771	0.0591382	0.0410252	2.61646e-06
rs17475926	C	T	2	229953391	0.0844803	0.490128	0.0188358	7.28815e-06
rs2935621	T	C	5	2685812	-0.092281	0.321208	0.0202945	5.43937e-06
rs6729788	G	T	2	177086326	-0.0851147	0.488046	0.0189199	6.83768e-06
rs6957565	T	C	7	38834068	-0.0932585	0.489232	0.0185033	4.65306e-07
rs8032562	T	C	15	97032068	0.0864317	0.371076	0.0194986	9.3053e-06
rs9292972	G	C	5	21365427	0.149319	0.101138	0.0315947	2.28899e-06
rs11041738	T	C	11	8114103	-0.0967085	0.244794	0.0196558	8.65034e-07
rs11104946	G	T	12	77760259	-0.0978269	0.173448	0.0217625	6.95035e-06
rs117024060	A	G	15	55772583	-0.145622	0.0789775	0.0326046	7.95874e-06
rs488197	T	C	9	38274267	-0.0757035	0.420306	0.0170995	9.54447e-06
rs7660775	C	A	4	114611948	0.11056	0.12708	0.0246844	7.50181e-06
rs7804962	C	T	7	13303509	0.0881322	0.333402	0.017565	5.23494e-07
rs8011841	T	C	14	97461817	-0.0730403	0.483236	0.0164339	8.80983e-06
rs11044047	C	A	12	18510881	-0.33248	0.0529887	0.0715079	3.32649e-06
rs1978600	C	T	3	141149287	-0.32675	0.938397	0.0734597	8.66686e-06
rs2293361	C	T	2	54114864	0.322296	0.0589158	0.0669307	1.46921e-06
rs56702013	A	G	17	111695	0.143437	0.49903	0.0310823	3.93532e-06
rs72891473	A	T	6	66586528	0.301887	0.0596427	0.0679083	8.76797e-06
rs79529135	G	T	17	20700719	0.186537	0.216519	0.0418162	8.16193e-06
rs9972236	T	C	14	94571340	0.204346	0.155573	0.0435143	2.65225e-06
rs11058405	C	T	12	126443740	0.166736	0.212283	0.0351824	2.14591e-06
rs4494791	C	T	2	111587016	-0.123821	0.377533	0.0275844	7.16189e-06
rs61945642	T	C	12	101946880	0.220687	0.0774712	0.049466	8.14276e-06
rs7984826	G	A	13	71853050	-0.11973	0.561903	0.026677	7.18519e-06
rs11060559	A	G	12	130283785	0.197791	0.742152	0.0442985	8.0082e-06
rs1463878	G	T	3	192612921	0.208321	0.780479	0.0453591	4.37543e-06
rs1976629	T	C	18	76478271	-0.302914	0.906393	0.0667073	5.60033e-06
rs35595126	T	C	14	65226044	0.284059	0.114309	0.0633468	7.31909e-06
rs35665752	G	T	1	28747911	-0.283199	0.107347	0.0621573	5.20973e-06
rs57193778	G	A	8	136718087	0.274168	0.10972	0.0610191	7.01743e-06
rs574764	A	C	18	61641374	0.188711	0.386483	0.0408175	3.7771e-06
rs6597377	C	A	6	8991886	-0.183384	0.453141	0.0400138	4.58294e-06
rs715519	C	G	22	51038369	-0.259143	0.140116	0.0570563	5.57565e-06
rs73187354	A	G	12	108041797	-0.243218	0.183607	0.0504041	1.39746e-06
rs80196726	G	C	4	19449962	-0.295359	0.0933682	0.0664057	8.67572e-06
rs11067415	C	A	12	115550990	-0.0947736	0.221027	0.020526	3.8887e-06
rs11260998	A	G	1	18718305	-0.0786151	0.391129	0.0175239	7.25208e-06
rs12913320	T	C	15	89377788	-0.0930015	0.236977	0.0208979	8.57629e-06
rs13009600	A	G	2	211772624	0.0806918	0.38298	0.0174623	3.82037e-06
rs2579005	G	T	2	216484768	0.0905141	0.700988	0.0192398	2.54452e-06
rs2990682	G	C	1	13839382	0.0917936	0.304496	0.0187482	9.77475e-07
rs6127771	T	C	20	36959732	-0.079596	0.535175	0.0171965	3.68116e-06
rs6958516	C	G	7	158240602	-0.08895	0.305635	0.0189988	2.84263e-06
rs765025	G	C	4	66600345	0.103214	0.166572	0.0230703	7.681e-06
rs77848425	T	C	4	186557727	0.129746	0.10663	0.0284739	5.19727e-06
rs11102545	G	A	1	113349408	0.145432	0.349388	0.0316205	4.23909e-06
rs12978412	T	C	19	47945391	0.140571	0.642047	0.0307592	4.87644e-06
rs3000812	G	A	1	227588556	0.154688	0.263653	0.0337761	4.65429e-06
rs325705	A	G	11	6264866	-0.140013	0.509487	0.0314163	8.32352e-06
rs62111248	A	G	19	29525312	0.231829	0.0999765	0.0502065	3.88396e-06
rs6548355	G	A	3	164260603	0.135331	0.615946	0.0304946	9.08617e-06
rs6601127	T	G	5	179977388	-0.136437	0.529803	0.0295882	4.00321e-06
rs7274039	T	C	20	50714876	-0.265598	0.099162	0.0562249	2.31414e-06
rs72743290	T	C	1	205234393	0.241471	0.0997011	0.0518674	3.23114e-06
rs8017450	T	G	14	62520084	0.262172	0.0721426	0.058491	7.38549e-06
rs11111	C	T	5	37814102	-0.103454	0.183291	0.0234163	9.9605e-06
rs117633633	A	G	16	87943237	0.191045	0.0686066	0.0422441	6.11419e-06
rs13096936	G	A	3	42925008	0.109896	0.289539	0.0208761	1.40813e-07
rs2383400	A	G	4	180655477	0.0862234	0.525855	0.0189004	5.06745e-06
rs2470427	T	C	12	2075984	0.0905437	0.487964	0.0184222	8.88156e-07
rs366171	T	A	16	66906450	-0.0978055	0.388087	0.0190936	3.01632e-07
rs495710	T	C	15	46935830	-0.0921548	0.472152	0.0185091	6.39534e-07
rs5754282	C	A	22	33176834	0.101205	0.227051	0.0224536	6.56532e-06
rs6583351	C	T	7	186119	0.0851714	0.514788	0.0187403	5.49817e-06
rs7011780	C	A	8	125596990	0.130826	0.11191	0.0292709	7.84129e-06
rs7019674	C	T	9	81809148	-0.0842361	0.49146	0.0187999	7.44085e-06
rs73619447	T	C	20	61629312	-0.172843	0.0602449	0.0389841	9.26388e-06
rs74682567	G	A	17	37804675	-0.201543	0.0650097	0.0417131	1.35406e-06
rs76880769	A	G	6	68516989	-0.187932	0.0558398	0.0419932	7.63041e-06
rs11113894	A	G	12	108841863	0.393284	0.0508065	0.0886952	9.24545e-06
rs1118894	A	G	13	76658738	0.274168	0.867117	0.0590236	3.39966e-06
rs11734017	T	C	4	187526100	0.20506	0.307114	0.0446326	4.33983e-06
rs12488234	G	T	3	112191202	-0.318667	0.105917	0.0708029	6.77098e-06
rs1458987	T	C	3	55103700	-0.32208	0.0855867	0.071939	7.56516e-06
rs2332915	C	G	14	73182541	-0.201062	0.377171	0.0446853	6.81101e-06
rs278731	T	C	9	76162393	-0.407555	0.0504032	0.0920671	9.56797e-06
rs28635178	A	G	3	66026666	0.408662	0.0528226	0.090122	5.77295e-06
rs299199	A	G	5	118301430	0.195759	0.454333	0.0420816	3.28882e-06
rs35870858	C	G	7	48196153	0.325695	0.0823956	0.0734979	9.36427e-06
rs4333664	T	C	9	6556948	-0.17962	0.455242	0.0401337	7.62132e-06
rs4433502	A	G	10	133569215	0.199777	0.349453	0.0436121	4.63281e-06
rs60200511	G	A	1	244935076	0.319997	0.0939516	0.0682303	2.73265e-06
rs6517636	G	A	21	42257555	0.252978	0.805669	0.0555355	5.23222e-06
rs735027	G	A	11	95301453	-0.216493	0.298145	0.0452388	1.70502e-06
rs11113910	A	C	12	108874663	-0.111451	0.139107	0.023851	2.97134e-06
rs1420536	G	A	16	52443744	0.0738342	0.468396	0.0165908	8.57437e-06
rs2004833	T	G	2	44374984	0.0767079	0.651762	0.0170252	6.62017e-06
rs2834333	A	C	21	35370488	-0.0822713	0.536805	0.0162658	4.23814e-07
rs28517505	A	G	17	81064203	0.0784057	0.687092	0.0175998	8.3923e-06
rs59033852	C	T	13	23656934	-0.159079	0.0646688	0.0340677	3.01938e-06
rs74034215	C	T	16	86106253	0.130627	0.111819	0.026673	9.71443e-07
rs76883601	C	T	14	78483292	0.136403	0.0847648	0.0295783	3.99619e-06
rs9673456	G	T	16	62465518	-0.0822555	0.420045	0.016948	1.21354e-06
rs11127034	C	G	2	86648492	0.152524	0.662287	0.0337479	6.19798e-06
rs11223731	A	G	11	134100499	-0.18607	0.243695	0.0374824	6.89853e-07
rs11581135	A	C	1	203341531	-0.161679	0.381589	0.035444	5.07839e-06
rs12986007	T	G	19	49768214	-0.296425	0.0759376	0.0653759	5.78326e-06
rs1346173	A	G	12	108635460	0.156595	0.658018	0.034581	5.94437e-06
rs140741191	C	T	6	34301848	-0.347812	0.0503402	0.0759706	4.68898e-06
rs16899159	A	C	6	67887156	-0.149747	0.365249	0.0337004	8.85168e-06
rs28521978	A	G	14	33633609	0.1631	0.289057	0.0362663	6.883e-06
rs3750889	T	C	8	132002334	-0.158479	0.593717	0.0325016	1.08243e-06
rs4559153	T	C	7	46213818	0.175285	0.266562	0.0370708	2.26332e-06
rs4970837	T	G	1	109822008	-0.156474	0.651374	0.0344	5.39854e-06
rs61854800	T	C	10	70008028	0.23618	0.117059	0.0508065	3.3416e-06
rs61895387	T	A	11	102268603	-0.31575	0.074851	0.0669609	2.41197e-06
rs752704	C	T	1	47011372	-0.148743	0.471083	0.0324489	4.56342e-06
rs76588436	A	T	10	130572914	0.309762	0.0661079	0.0681741	5.52798e-06
rs78404253	A	G	7	12732484	0.283489	0.0895404	0.0613913	3.87943e-06
rs8089654	G	T	18	12734224	0.228586	0.863953	0.0498372	4.50412e-06
rs111544141	T	A	1	52053017	0.433734	0.0500989	0.0876619	7.50532e-07
rs114804117	T	A	3	20070515	0.4101	0.0563533	0.089318	4.40162e-06
rs13055049	C	T	22	19641083	0.258895	0.16852	0.0506748	3.23966e-07
rs1389373	T	G	8	16771538	0.383456	0.947534	0.0867808	9.93053e-06
rs17692191	A	G	14	48465864	-0.228239	0.173528	0.0499957	4.99095e-06
rs17709673	T	C	3	73965973	-0.184618	0.330523	0.041545	8.83834e-06
rs3807927	T	A	7	20380184	0.307966	0.0915143	0.0644421	1.76203e-06
rs3935	A	C	18	12448430	0.187868	0.72549	0.0418038	6.98836e-06
rs4900028	T	C	14	90685594	0.182887	0.574911	0.0377341	1.2551e-06
rs56347647	C	T	12	5294392	0.290928	0.109573	0.0638107	5.13415e-06
rs9459627	T	C	6	166675591	-0.204583	0.30004	0.041845	1.01314e-06
rs111544141	T	A	1	52053017	0.423935	0.0502198	0.0874095	1.23472e-06
rs13055049	C	T	22	19641083	0.257556	0.168505	0.0506641	3.7035e-07
rs1389373	T	G	8	16771538	0.389432	0.947478	0.0866371	6.95752e-06
rs1652670	G	A	18	12431210	0.185952	0.719256	0.0414666	7.31232e-06
rs17692191	A	G	14	48465864	-0.226361	0.173258	0.0499856	5.93963e-06
rs17709673	T	C	3	73965973	-0.192549	0.332319	0.0414122	3.3261e-06
rs3807927	T	A	7	20380184	0.299894	0.0917186	0.0643504	3.15699e-06
rs4904659	A	C	14	90724923	-0.195869	0.358047	0.0399736	9.58537e-07
rs4974008	C	T	3	42159351	-0.171168	0.633833	0.03874	9.94386e-06
rs9459627	T	C	6	166675591	-0.201594	0.299709	0.0418683	1.47237e-06
rs11161058	T	C	14	29958756	-0.0800937	0.483784	0.0170429	2.60744e-06
rs12134195	C	A	1	66851542	-0.134691	0.0858402	0.0299956	7.10988e-06
rs17070727	A	G	8	4453705	0.12916	0.0950225	0.0289128	7.92397e-06
rs1728059	C	T	2	84941232	-0.0882622	0.265891	0.0187952	2.65317e-06
rs34355813	C	T	3	113301686	-0.168088	0.0544599	0.0371934	6.205e-06
rs34990336	G	A	9	110273582	0.0948989	0.209323	0.0210221	6.35459e-06
rs4693197	A	G	4	88801072	0.115968	0.134327	0.0241116	1.51224e-06
rs6508629	T	C	18	27557607	-0.102602	0.159404	0.022689	6.12294e-06
rs7043141	T	G	9	23442387	0.113549	0.134128	0.0245784	3.83989e-06
rs79555856	C	T	6	6545643	-0.131509	0.101322	0.029628	9.05087e-06
rs9886784	C	A	9	1521204	0.0887528	0.772554	0.0199667	8.78759e-06
rs11170859	C	T	12	39538134	-0.106241	0.141612	0.0233689	5.46106e-06
rs12209689	T	C	6	41378487	-0.117475	0.125234	0.0251846	3.09292e-06
rs140675300	G	C	8	137890198	0.156692	0.068631	0.0341991	4.61061e-06
rs140914801	A	G	11	46188386	0.11295	0.116664	0.0255679	9.97801e-06
rs1865283	G	A	11	4830320	0.0798486	0.65794	0.0174522	4.75589e-06
rs61960721	T	G	13	88174396	0.0811147	0.330124	0.0177843	5.0904e-06
rs78786599	T	C	8	58204133	-0.144601	0.0706422	0.0327133	9.85858e-06
rs111842857	G	C	16	5455531	0.167244	0.252163	0.0372849	7.27236e-06
rs141306664	G	A	2	103065467	-0.345674	0.0512882	0.0727756	2.03549e-06
rs231723	G	A	2	204739781	-0.146563	0.392175	0.0325733	6.81153e-06
rs35501864	G	A	14	37425905	-0.149949	0.41	0.0321853	3.17876e-06
rs62358729	C	T	5	39183334	-0.181357	0.198663	0.0403199	6.86088e-06
rs77214081	G	A	16	51193047	-0.340309	0.0503147	0.0747294	5.26652e-06
rs111854245	C	T	5	110389110	-0.109559	0.143828	0.0247809	9.81894e-06
rs117996720	A	C	11	32460157	-0.166308	0.0608325	0.0366775	5.77868e-06
rs154221	T	C	5	58598034	-0.114376	0.111851	0.0255568	7.62818e-06
rs17206746	T	A	8	59544252	0.0829663	0.288105	0.0179829	3.95723e-06
rs4446400	T	C	4	118732670	-0.0734502	0.400889	0.0165219	8.76394e-06
rs6887055	G	A	5	82885783	0.0915711	0.20347	0.0202793	6.3166e-06
rs74949229	A	G	10	9526946	-0.141078	0.0938701	0.0283076	6.23616e-07
rs11208867	A	T	1	66920064	0.0850257	0.258643	0.0186832	5.3414e-06
rs1814009	A	G	2	100693264	-0.0878675	0.261238	0.0187736	2.86338e-06
rs2119879	C	T	8	135549042	-0.0786974	0.32444	0.0175895	7.67342e-06
rs2341789	C	T	8	29313796	-0.132618	0.878336	0.0249506	1.06532e-07
rs61571947	G	A	18	2457913	-0.101888	0.188409	0.0227273	7.35735e-06
rs6575490	A	G	14	95477213	0.0862678	0.247636	0.0191187	6.41564e-06
rs77194050	G	A	16	70687185	-0.169598	0.0613003	0.0348422	1.12957e-06
rs11210592	G	A	1	42581600	0.105431	0.192552	0.0205474	2.87992e-07
rs11625794	G	A	14	90811229	-0.074346	0.43836	0.0167112	8.63202e-06
rs116656500	C	T	4	7961293	-0.150967	0.0658668	0.0332048	5.4533e-06
rs11892661	G	T	2	213400434	-0.0885936	0.228781	0.0195958	6.15365e-06
rs12619063	A	G	2	226467954	-0.0907745	0.219821	0.0203645	8.29213e-06
rs166135	A	G	5	3194999	-0.073012	0.463958	0.0162784	7.28446e-06
rs1892388	T	A	10	79618066	-0.157692	0.0585681	0.035191	7.42819e-06
rs2903645	C	T	4	14349049	-0.0747618	0.632013	0.0167254	7.82357e-06
rs61025394	A	G	6	7085817	-0.0907695	0.195299	0.0204079	8.67713e-06
rs6558174	G	A	8	22492129	-0.0822329	0.69082	0.0176301	3.09604e-06
rs7078960	G	A	10	12589150	0.0835007	0.631884	0.0182234	4.60418e-06
rs9882102	A	G	3	42159514	-0.0760817	0.575358	0.0165105	4.0643e-06
rs11211406	A	C	1	47413786	0.0922835	0.789079	0.0196436	2.62854e-06
rs2465506	T	C	7	79328573	-0.146726	0.929491	0.0315474	3.30386e-06
rs4949447	G	A	1	32057186	-0.07765	0.683099	0.0172744	6.95428e-06
rs6131687	A	G	20	15649074	-0.0712291	0.476825	0.0160801	9.43874e-06
rs61881300	T	C	11	35847569	-0.0998828	0.159687	0.0223981	8.21787e-06
rs73344869	T	C	5	177746345	0.172349	0.0745717	0.0307767	2.14399e-08
rs74459573	C	T	11	66690149	0.0889157	0.19937	0.0200037	8.79073e-06
rs77318370	G	A	12	72532501	0.172345	0.0543052	0.0388627	9.21965e-06
rs9511112	G	A	13	24753101	0.0897462	0.76759	0.0199633	6.93884e-06
rs952822	A	G	2	52851073	0.0752991	0.379853	0.0166714	6.28217e-06
rs11211406	A	C	1	47413786	0.0919539	0.789079	0.0196408	2.84398e-06
rs2465506	T	C	7	79328573	-0.145905	0.929491	0.0315429	3.73501e-06
rs4949447	G	A	1	32057186	-0.0771561	0.683099	0.017272	7.92791e-06
rs6131687	A	G	20	15649074	-0.0715726	0.476825	0.0160778	8.52169e-06
rs61881300	T	C	11	35847569	-0.100451	0.159687	0.022395	7.27681e-06
rs73344869	T	C	5	177746345	0.172423	0.0745717	0.0307724	2.10469e-08
rs74459573	C	T	11	66690149	0.088645	0.19937	0.0200009	9.33375e-06
rs77318370	G	A	12	72532501	0.172751	0.0543052	0.0388572	8.75654e-06
rs9511112	G	A	13	24753101	0.0896655	0.76759	0.0199605	7.05071e-06
rs952822	A	G	2	52851073	0.0752055	0.379853	0.016669	6.43138e-06
rs112241999	T	C	4	53563365	0.353483	0.0731481	0.0766103	3.94915e-06
rs1149732	T	C	10	79986352	0.155861	0.383414	0.0352367	9.7224e-06
rs12204031	A	T	6	155836415	-0.274687	0.124723	0.0610857	6.89987e-06
rs17381234	G	A	13	108998914	0.18576	0.35548	0.0371546	5.7438e-07
rs17457331	G	T	12	19899635	-0.27535	0.0927686	0.0617179	8.14175e-06
rs2332915	C	G	14	73182541	-0.185244	0.378703	0.0378778	1.00548e-06
rs2598336	C	G	12	16256537	0.160911	0.593418	0.035888	7.33661e-06
rs278502	G	A	5	100103358	0.166232	0.333772	0.0366985	5.90738e-06
rs3135176	C	T	4	3267074	0.29376	0.0921269	0.0645394	5.32286e-06
rs34185363	A	T	14	42517765	0.174465	0.300908	0.0382463	5.07617e-06
rs6684536	T	C	1	18712328	-0.183246	0.245857	0.0406075	6.40359e-06
rs76832256	C	T	4	149841540	-0.175687	0.263946	0.0385789	5.26459e-06
rs112241999	T	C	4	53563365	0.35592	0.0730194	0.0767043	3.48152e-06
rs1149732	T	C	10	79986352	0.156996	0.382739	0.0352505	8.43981e-06
rs11689862	G	T	2	81066982	-0.216861	0.847484	0.048965	9.47205e-06
rs12204031	A	T	6	155836415	-0.273266	0.124503	0.0611533	7.87542e-06
rs17381234	G	A	13	108998914	0.185051	0.355456	0.0371903	6.49815e-07
rs17457331	G	T	12	19899635	-0.277086	0.0928986	0.061724	7.15201e-06
rs2332915	C	G	14	73182541	-0.184069	0.378608	0.037914	1.20445e-06
rs2598336	C	G	12	16256537	0.162166	0.593195	0.0358989	6.26323e-06
rs278502	G	A	5	100103358	0.165598	0.333478	0.0367282	6.52115e-06
rs2899931	T	G	14	42338011	0.184167	0.242114	0.0405913	5.70283e-06
rs3135176	C	T	4	3267074	0.297472	0.0919798	0.0646219	4.15901e-06
rs6684536	T	C	1	18712328	-0.18069	0.245762	0.0406447	8.7642e-06
rs76832256	C	T	4	149841540	-0.176148	0.264639	0.0385687	4.94481e-06
rs112428203	T	C	7	147486250	-0.138203	0.174616	0.0305287	5.98297e-06
rs12232484	C	T	17	21062412	-0.125955	0.445343	0.0237103	1.08289e-07
rs12463384	A	C	19	21799037	0.114302	0.373021	0.024484	3.03473e-06
rs1896610	A	G	12	20347763	-0.134295	0.202817	0.0289879	3.60749e-06
rs2697923	T	G	11	47363215	-0.122751	0.651908	0.0241408	3.68008e-07
rs75238635	A	G	4	177157192	0.194892	0.0856001	0.0414986	2.64846e-06
rs79594952	G	A	13	59329981	0.171616	0.146863	0.0334868	2.9769e-07
rs112428203	T	C	7	147486250	-0.139492	0.174616	0.0305328	4.90998e-06
rs12232484	C	T	17	21062412	-0.125506	0.445343	0.0237135	1.20587e-07
rs12463384	A	C	19	21799037	0.113367	0.373021	0.0244873	3.66292e-06
rs1896610	A	G	12	20347763	-0.134792	0.202817	0.0289918	3.33028e-06
rs2697923	T	G	11	47363215	-0.122603	0.651908	0.024144	3.81432e-07
rs75238635	A	G	4	177157192	0.196849	0.0856001	0.0415042	2.10716e-06
rs79594952	G	A	13	59329981	0.171836	0.146863	0.0334913	2.88556e-07
rs112572980	G	A	6	12752767	0.190198	0.0527728	0.0427408	8.58607e-06
rs113117201	T	C	3	168326056	0.197345	0.0588079	0.0439409	7.08378e-06
rs115534005	C	T	5	44055894	0.229202	0.0507977	0.044755	3.03503e-07
rs13138313	T	C	4	146977979	0.0851873	0.414534	0.0189584	7.01049e-06
rs13166339	G	A	5	39774566	-0.180471	0.0659301	0.0381964	2.30336e-06
rs112572980	G	A	6	12752767	0.190137	0.0527728	0.0427409	8.6437e-06
rs113117201	T	C	3	168326056	0.197277	0.0588079	0.0439409	7.13565e-06
rs115534005	C	T	5	44055894	0.229237	0.0507977	0.0447551	3.02249e-07
rs13138313	T	C	4	146977979	0.0851979	0.414534	0.0189585	6.99238e-06
rs13166339	G	A	5	39774566	-0.180471	0.0659301	0.0381965	2.3033e-06
rs112572980	G	A	6	12752767	0.195442	0.0531246	0.0433271	6.45687e-06
rs115534005	C	T	5	44055894	0.222864	0.0506552	0.0454974	9.66199e-07
rs11676886	G	A	2	97249011	0.0901209	0.629911	0.020233	8.42283e-06
rs11731238	G	A	4	1063833	-0.176657	0.0666628	0.0397182	8.6769e-06
rs13138313	T	C	4	146977979	0.090024	0.41414	0.0192643	2.967e-06
rs17058001	T	C	6	130150468	0.181601	0.059268	0.0405322	7.44935e-06
rs1983438	G	A	12	61444056	0.0865054	0.388413	0.0195812	9.97191e-06
rs2362966	C	G	10	125560687	0.184059	0.066988	0.0411597	7.75516e-06
rs2791437	A	G	9	125844582	-0.116971	0.192315	0.0252604	3.64605e-06
rs62242204	A	G	3	30236230	-0.102919	0.233664	0.0232348	9.44408e-06
rs66723961	G	C	3	191258867	0.130347	0.135726	0.0291844	7.95794e-06
rs112691179	T	C	10	953842	0.177126	0.111026	0.0398192	8.65688e-06
rs12621563	G	A	2	126039243	-0.119565	0.498942	0.0242975	8.61653e-07
rs17807243	T	C	4	124386894	-0.173678	0.139747	0.0384507	6.27523e-06
rs4937922	A	G	11	134490977	-0.237213	0.0580265	0.0522438	5.61201e-06
rs61944855	A	G	12	101231320	-0.148523	0.244627	0.028725	2.33462e-07
rs6532564	C	G	4	96464931	-0.140127	0.787015	0.0315704	9.05603e-06
rs113022358	T	C	2	127208407	0.200395	0.0795312	0.0452748	9.59067e-06
rs11678259	G	T	2	53508689	0.117013	0.320759	0.0262963	8.59568e-06
rs12686124	G	A	9	109618233	-0.213224	0.0727698	0.0464187	4.35883e-06
rs1305081	A	G	13	29254871	0.182505	0.128637	0.0361045	4.30568e-07
rs13429913	T	C	2	228058913	0.111297	0.385846	0.0249482	8.15386e-06
rs2027516	A	G	6	136131888	0.119616	0.313637	0.0257131	3.28807e-06
rs4459949	G	A	4	161237172	-0.16846	0.844497	0.0323433	1.90363e-07
rs56353270	A	G	6	3651407	-0.227444	0.0676608	0.0488069	3.16094e-06
rs57091306	G	C	19	53549135	0.170615	0.123836	0.0374643	5.26148e-06
rs6748817	G	A	2	205258852	0.15142	0.824477	0.033392	5.77067e-06
rs73415022	C	T	22	35855603	0.174909	0.141355	0.0351324	6.40592e-07
rs9397388	G	T	6	151626774	-0.113861	0.646438	0.0252374	6.43422e-06
rs9462447	C	A	6	12080585	-0.15346	0.144878	0.0344169	8.24006e-06
rs113315281	G	A	5	28531872	-0.148351	0.108384	0.0297853	6.33667e-07
rs1510611	T	G	2	54865527	-0.0884672	0.594367	0.0175327	4.51538e-07
rs26702	C	T	5	58527391	-0.0808769	0.394094	0.0177656	5.30266e-06
rs4301441	G	T	8	40539356	0.144042	0.100135	0.0292486	8.44701e-07
rs4432059	T	C	11	111119178	-0.0896231	0.341703	0.0191325	2.80872e-06
rs55994980	A	G	19	7560434	0.103933	0.199165	0.0233574	8.59978e-06
rs73163971	T	C	3	168643821	-0.194918	0.0515452	0.043069	6.01902e-06
rs7862521	T	G	9	116406907	0.080884	0.439996	0.0180115	7.09915e-06
rs113638576	T	C	5	176756088	-0.215824	0.126007	0.0477445	6.17208e-06
rs72661091	A	G	4	73899661	0.288519	0.0672399	0.0588297	9.37568e-07
rs77053869	G	A	4	110562960	-0.273887	0.0675044	0.0617996	9.34274e-06
rs113640907	C	T	1	245894994	0.194644	0.11936	0.0436384	8.18158e-06
rs2005815	A	C	17	11186003	-0.282918	0.942274	0.0600299	2.44155e-06
rs311865	A	G	14	59214448	-0.152845	0.254885	0.0318161	1.55518e-06
rs3919827	T	G	4	67067806	-0.138415	0.273651	0.0313039	9.79461e-06
rs4709313	A	G	6	159803460	0.182133	0.160668	0.0397743	4.66856e-06
rs595638	T	C	4	127340666	-0.17446	0.836234	0.0377058	3.71218e-06
rs6052686	T	C	20	4594466	0.162031	0.762608	0.0354396	4.83026e-06
rs62240505	G	T	22	23936314	-0.211992	0.109091	0.0473853	7.68421e-06
rs6970331	T	C	7	152227594	0.127487	0.470452	0.028503	7.72116e-06
rs9314321	C	T	8	26116276	-0.267528	0.937106	0.0584491	4.71432e-06
rs114446285	G	A	2	127826259	-0.199986	0.212676	0.0433431	3.94938e-06
rs11626630	T	C	14	75207510	0.241475	0.154357	0.0530611	5.34213e-06
rs12621499	G	A	2	142324536	0.175683	0.309762	0.0391851	7.34604e-06
rs3916427	C	T	9	113929557	-0.163965	0.534825	0.035668	4.28699e-06
rs4239490	C	T	19	51132056	0.233868	0.833293	0.0505937	3.79196e-06
rs4416113	A	G	18	42991796	0.326565	0.0723921	0.0694734	2.59438e-06
rs4805798	A	G	19	28473852	0.16975	0.407123	0.036898	4.21463e-06
rs570295	G	A	6	12732095	0.191878	0.604353	0.0365803	1.55958e-07
rs9414689	G	C	9	140215415	0.204472	0.686804	0.045529	7.08813e-06
rs9508731	T	A	13	30981374	-0.327189	0.0991426	0.0687259	1.92844e-06
rs114446285	G	A	2	127826259	-0.200679	0.212676	0.0433453	3.66062e-06
rs11626630	T	C	14	75207510	0.240822	0.154357	0.0530639	5.66958e-06
rs12621499	G	A	2	142324536	0.174708	0.309762	0.0391872	8.26134e-06
rs3916427	C	T	9	113929557	-0.16395	0.534825	0.0356699	4.30048e-06
rs4239490	C	T	19	51132056	0.234442	0.833293	0.0505963	3.59398e-06
rs4416113	A	G	18	42991796	0.326474	0.0723921	0.069477	2.61409e-06
rs570295	G	A	6	12732095	0.191415	0.604353	0.0365822	1.67273e-07
rs9414689	G	C	9	140215415	0.205329	0.686804	0.0455314	6.49423e-06
rs9508731	T	A	13	30981374	-0.326536	0.0991426	0.0687295	2.02386e-06
rs114845775	T	C	9	1809229	-0.287556	0.0924841	0.0642764	7.6862e-06
rs11724182	T	C	4	4825522	0.297944	0.092553	0.0639105	3.13312e-06
rs11806181	T	G	1	60975097	-0.304541	0.0844595	0.0665955	4.80786e-06
rs12101679	A	G	15	36249420	-0.203089	0.197635	0.0459139	9.72268e-06
rs13265628	A	C	8	142353427	-0.272076	0.111797	0.0607095	7.40835e-06
rs17693136	T	C	4	178513823	0.211231	0.239085	0.042932	8.64931e-07
rs568692	C	T	5	4016609	-0.170235	0.445607	0.0366008	3.30112e-06
rs598632	T	C	7	4166627	-0.272144	0.108492	0.0601463	6.04821e-06
rs62163269	T	C	2	77881630	-0.261356	0.169808	0.050743	2.59689e-07
rs114970711	T	G	6	87288279	-0.252648	0.0684313	0.0541406	3.06351e-06
rs13312424	T	C	7	11754881	-0.124602	0.571065	0.0274661	5.71787e-06
rs1861386	T	C	2	206599428	-0.122318	0.585772	0.0275056	8.70675e-06
rs2487307	A	G	14	104632132	-0.153012	0.615524	0.0331316	3.869e-06
rs286623	A	G	5	154366183	0.125867	0.653692	0.0283189	8.80429e-06
rs4767925	G	A	12	121085949	-0.234803	0.0850648	0.0487333	1.4491e-06
rs7791761	T	C	7	69711317	-0.258265	0.0622544	0.0563192	4.5237e-06
rs9536634	T	A	13	54678393	-0.132267	0.350627	0.0283925	3.18507e-06
rs1157623	A	G	3	192752645	0.258555	0.0893965	0.0585189	9.94761e-06
rs11676681	A	G	2	33375948	-0.164171	0.589611	0.0346399	2.14386e-06
rs1470205	T	C	3	77316688	-0.172977	0.592543	0.0344305	5.06195e-07
rs1667938	T	C	18	74875950	-0.261236	0.0938965	0.0580537	6.79817e-06
rs450741	A	C	22	21403971	-0.34627	0.939452	0.0771182	7.1185e-06
rs4867972	G	C	5	169932910	-0.180697	0.291164	0.0375989	1.54043e-06
rs61944136	G	A	12	119247004	0.267509	0.0980868	0.0599541	8.12389e-06
rs814760	A	G	1	110980659	0.188016	0.216443	0.0414282	5.66966e-06
rs11626416	A	G	14	33053536	-0.118337	0.125363	0.0244909	1.35255e-06
rs12646537	G	A	4	184720947	0.145028	0.0653836	0.032508	8.14638e-06
rs12734494	A	G	1	211803881	0.0791571	0.48892	0.0164342	1.46017e-06
rs13071362	G	A	3	116990816	0.0778951	0.302458	0.0176263	9.90397e-06
rs2834333	A	C	21	35370488	-0.0774478	0.537174	0.0161535	1.63097e-06
rs59033852	C	T	13	23656934	-0.152927	0.0649189	0.0337678	5.93229e-06
rs62351959	T	C	4	182904885	0.0966813	0.197615	0.0215454	7.21198e-06
rs713716	A	G	22	46871094	-0.0844048	0.252325	0.0186883	6.28849e-06
rs74034215	C	T	16	86106253	0.131706	0.111825	0.0265059	6.73239e-07
rs78026425	G	C	14	78485536	0.130889	0.0851163	0.0292566	7.6832e-06
rs79598028	T	C	16	85374721	0.124831	0.119662	0.0261276	1.77263e-06
rs9428844	C	T	1	240647593	-0.0888565	0.656533	0.0200476	9.32472e-06
rs9673456	G	T	16	62465518	-0.0816209	0.419921	0.01684	1.25435e-06
rs11626416	A	G	14	33053536	-0.118366	0.125363	0.0244903	1.34362e-06
rs12646537	G	A	4	184720947	0.145092	0.0653836	0.0325072	8.06762e-06
rs12734494	A	G	1	211803881	0.0791433	0.48892	0.0164338	1.46546e-06
rs2834333	A	C	21	35370488	-0.0774573	0.537174	0.0161531	1.62523e-06
rs4711841	C	G	6	12818142	-0.0736587	0.384336	0.0166717	9.9537e-06
rs4895929	T	C	6	132458419	-0.0750869	0.386573	0.0168552	8.3967e-06
rs59033852	C	T	13	23656934	-0.152808	0.0649189	0.033767	6.02916e-06
rs62351959	T	C	4	182904885	0.0966807	0.197615	0.0215448	7.20913e-06
rs713716	A	G	22	46871094	-0.0844243	0.252325	0.0186878	6.25433e-06
rs74034215	C	T	16	86106253	0.131772	0.111825	0.0265053	6.64231e-07
rs78026425	G	C	14	78485536	0.130845	0.0851163	0.0292559	7.73382e-06
rs79598028	T	C	16	85374721	0.12483	0.119662	0.0261269	1.77205e-06
rs9428844	C	T	1	240647593	-0.0888881	0.656533	0.0200471	9.25205e-06
rs9673456	G	T	16	62465518	-0.0816041	0.419921	0.0168395	1.25989e-06
rs11646266	T	C	16	115817	0.081255	0.428434	0.0170316	1.83454e-06
rs13193662	G	A	6	16807562	0.0948871	0.222041	0.0213763	9.04223e-06
rs142222485	A	G	15	73669313	0.149921	0.072205	0.0322005	3.22628e-06
rs1498839	T	C	3	69516937	0.0871456	0.258826	0.0189414	4.2086e-06
rs1514626	T	C	8	132765741	0.105021	0.139236	0.0237637	9.89877e-06
rs56282904	G	A	2	57276048	0.0886546	0.2577	0.0189872	3.02418e-06
rs6044532	C	T	20	16934650	-0.073067	0.463138	0.01654	9.98038e-06
rs6732796	T	A	2	15240601	-0.160154	0.0560728	0.036148	9.40147e-06
rs11652058	A	G	17	64584932	0.0912383	0.217003	0.0199153	4.6208e-06
rs2849714	C	T	21	43208598	0.122785	0.10702	0.0269753	5.32008e-06
rs28806584	C	G	3	68010971	-0.0819916	0.696357	0.017878	4.51455e-06
rs2907732	A	C	7	153780749	0.082498	0.606662	0.0175735	2.67321e-06
rs4234207	G	A	3	194731909	0.118163	0.86877	0.0242532	1.10444e-06
rs550057	T	C	9	136146597	0.110172	0.250228	0.0185759	3.01242e-09
rs6793441	A	C	3	8775223	0.0834386	0.323931	0.0186694	7.84841e-06
rs77502228	T	A	2	140505773	-0.160702	0.0575034	0.0353101	5.33501e-06
rs7831606	A	T	8	128455694	-0.0995338	0.163846	0.0221652	7.10439e-06
rs78362376	G	C	8	106944849	0.123068	0.105462	0.0266391	3.84031e-06
rs11652058	A	G	17	64584932	0.0912553	0.217003	0.0199153	4.60179e-06
rs2849714	C	T	21	43208598	0.122786	0.10702	0.0269752	5.31872e-06
rs28806584	C	G	3	68010971	-0.08201	0.696357	0.017878	4.49212e-06
rs2907732	A	C	7	153780749	0.0825064	0.606662	0.0175735	2.66686e-06
rs4234207	G	A	3	194731909	0.118166	0.86877	0.0242532	1.10364e-06
rs550057	T	C	9	136146597	0.110155	0.250228	0.0185759	3.02942e-09
rs6793441	A	C	3	8775223	0.0834256	0.323931	0.0186693	7.87371e-06
rs77502228	T	A	2	140505773	-0.160699	0.0575034	0.0353101	5.3371e-06
rs7831606	A	T	8	128455694	-0.0995627	0.163846	0.0221652	7.06067e-06
rs78362376	G	C	8	106944849	0.123064	0.105462	0.026639	3.84299e-06
rs11652559	C	T	17	36002599	0.115997	0.807699	0.025306	4.56669e-06
rs4975752	G	T	5	1880588	-0.101685	0.230866	0.0230142	9.94528e-06
rs62131327	C	T	19	775626	0.146411	0.104702	0.0330701	9.54197e-06
rs73037929	T	G	19	28461212	-0.210453	0.0539829	0.0439456	1.67669e-06
rs73114746	T	C	20	43873729	0.153275	0.099634	0.0332862	4.12933e-06
rs733330	G	A	8	94158704	0.10053	0.33704	0.0213377	2.46079e-06
rs75298326	T	A	12	24268068	-0.18366	0.0592882	0.041519	9.7113e-06
rs78685125	T	C	3	37667096	-0.174418	0.0669123	0.0392434	8.80877e-06
rs11652559	C	T	17	36002599	0.115982	0.807699	0.025306	4.57969e-06
rs4975752	G	T	5	1880588	-0.101686	0.230866	0.0230142	9.94264e-06
rs62131327	C	T	19	775626	0.1464	0.104702	0.0330701	9.55696e-06
rs73037929	T	G	19	28461212	-0.21042	0.0539829	0.0439455	1.68284e-06
rs73114746	T	C	20	43873729	0.153268	0.099634	0.0332861	4.13366e-06
rs733330	G	A	8	94158704	0.100522	0.33704	0.0213377	2.46501e-06
rs75298326	T	A	12	24268068	-0.183637	0.0592882	0.041519	9.73569e-06
rs78685125	T	C	3	37667096	-0.174426	0.0669123	0.0392434	8.8001e-06
rs11652559	C	T	17	36002599	0.115925	0.807699	0.025306	4.62916e-06
rs4975752	G	T	5	1880588	-0.101691	0.230866	0.0230142	9.93357e-06
rs62131327	C	T	19	775626	0.146435	0.104702	0.0330701	9.50963e-06
rs73037929	T	G	19	28461212	-0.210504	0.0539829	0.0439456	1.66692e-06
rs73114746	T	C	20	43873729	0.15327	0.099634	0.0332861	4.1324e-06
rs733330	G	A	8	94158704	0.100498	0.33704	0.0213377	2.47878e-06
rs75298326	T	A	12	24268068	-0.183606	0.0592882	0.041519	9.76911e-06
rs78685125	T	C	3	37667096	-0.174589	0.0669123	0.0392434	8.63185e-06
rs11654291	T	C	17	37249250	0.112638	0.198176	0.0245519	4.48045e-06
rs12367159	T	C	12	53379025	0.144297	0.888638	0.030907	3.03048e-06
rs12739496	A	C	1	194030338	-0.179708	0.0567297	0.0405186	9.19904e-06
rs144905245	A	G	3	147732932	0.183247	0.0565893	0.0413997	9.58679e-06
rs149486873	T	C	7	3177604	-0.205733	0.052965	0.0431904	1.90355e-06
rs2204037	G	A	13	63436800	-0.0880093	0.593001	0.0190422	3.80423e-06
rs2457684	C	T	11	88139983	-0.0845478	0.524423	0.0189817	8.42156e-06
rs34612513	A	T	3	137541085	-0.163509	0.102651	0.0334846	1.04418e-06
rs868452	A	G	12	116179325	-0.125405	0.140339	0.0272938	4.33473e-06
rs116643293	G	A	4	189181981	-0.329891	0.0529189	0.068787	1.61999e-06
rs12592302	T	A	15	58912586	0.225138	0.122239	0.0467972	1.50228e-06
rs1355585	C	T	15	70586617	-0.141485	0.563593	0.0302699	2.9525e-06
rs173961	A	G	16	52416513	-0.204526	0.154021	0.0415104	8.34575e-07
rs2395296	G	A	6	32911814	0.143303	0.714675	0.0321743	8.42957e-06
rs67541505	G	A	2	45885915	0.177406	0.170197	0.0398749	8.62462e-06
rs74338790	G	A	4	112421997	0.252493	0.0844046	0.0552387	4.85528e-06
rs79825773	T	G	7	45140515	0.307706	0.063652	0.0692042	8.73406e-06
rs9389726	C	T	6	140158828	-0.149627	0.306409	0.0335651	8.27947e-06
rs116643293	G	A	4	189181981	-0.327499	0.0529189	0.0687734	1.91686e-06
rs12592302	T	A	15	58912586	0.223318	0.122239	0.046788	1.81523e-06
rs1355585	C	T	15	70586617	-0.142	0.563593	0.030264	2.70474e-06
rs173961	A	G	16	52416513	-0.204293	0.154021	0.0415022	8.54671e-07
rs2395296	G	A	6	32911814	0.142807	0.714675	0.0321679	9.02059e-06
rs67541505	G	A	2	45885915	0.176456	0.170197	0.0398671	9.5947e-06
rs74338790	G	A	4	112421997	0.254628	0.0844046	0.0552278	4.01691e-06
rs79825773	T	G	7	45140515	0.309465	0.063652	0.0691906	7.72589e-06
rs9389726	C	T	6	140158828	-0.148739	0.306409	0.0335585	9.32626e-06
rs11664566	T	C	18	30050356	0.161176	0.15151	0.0361661	8.32957e-06
rs12022867	T	C	1	186786065	-0.189732	0.123737	0.0412005	4.12299e-06
rs13333427	G	A	16	69959741	-0.279033	0.0508214	0.0598337	3.10907e-06
rs1553042	A	G	17	31608930	0.139351	0.309212	0.0287564	1.2603e-06
rs28450200	T	C	8	15070111	0.193309	0.826147	0.0340527	1.37269e-08
rs34886974	T	C	14	51827473	-0.187095	0.111584	0.0422432	9.46699e-06
rs55790429	G	C	3	7879112	0.124676	0.319025	0.0280645	8.89232e-06
rs71385354	C	G	17	52135707	0.241135	0.0602341	0.0538235	7.46062e-06
rs73147950	A	C	20	59631773	-0.146211	0.209161	0.0323458	6.17637e-06
rs9958338	T	C	18	377105	0.119481	0.488401	0.0262257	5.21631e-06
rs116667913	T	C	14	90816301	-0.392908	0.0522771	0.0843559	3.19694e-06
rs12078845	C	A	1	54602977	-0.203872	0.239746	0.0450655	6.07089e-06
rs17141635	A	G	11	80877325	-0.408239	0.0512244	0.0847866	1.47279e-06
rs274124	G	A	1	36591554	0.265189	0.88533	0.0591116	7.24909e-06
rs11694441	A	C	2	119541381	-0.156202	0.125619	0.0340182	4.3961e-06
rs12064418	T	C	1	16761962	0.149719	0.163086	0.0336029	8.3686e-06
rs12889801	T	C	14	38756561	-0.101056	0.498558	0.0226416	8.07099e-06
rs1400577	G	A	16	73551996	-0.102174	0.600301	0.0225061	5.6305e-06
rs17052168	C	T	4	175395062	0.155888	0.11767	0.0348837	7.86681e-06
rs1960416	T	C	8	18785706	0.13484	0.175817	0.029836	6.2022e-06
rs3892326	C	T	21	43018030	-0.131019	0.480319	0.0241887	6.07612e-08
rs75005855	A	T	1	175381699	-0.23429	0.053901	0.051872	6.28121e-06
rs76752365	C	G	3	118350858	-0.159306	0.135036	0.0326209	1.04193e-06
rs7703260	C	T	5	141901900	-0.151658	0.155324	0.0305978	7.17799e-07
rs77655905	A	G	10	126611387	0.165351	0.103922	0.0366567	6.45837e-06
rs946119	T	C	6	97513091	-0.169496	0.107641	0.036581	3.59613e-06
rs117076107	A	G	10	135417440	-0.197134	0.0608167	0.0376204	1.6051e-07
rs12726307	T	G	1	177541010	0.119809	0.145928	0.0251698	1.93552e-06
rs292226	A	G	6	90626584	0.109603	0.187608	0.0230947	2.07668e-06
rs80113686	C	G	9	18127674	-0.127998	0.117738	0.0284635	6.89449e-06
rs117329402	T	G	7	17799597	-0.354823	0.0607412	0.07614	3.16002e-06
rs1893286	G	T	18	6668640	-0.208354	0.237649	0.0455351	4.74682e-06
rs6481791	C	T	10	19492259	-0.238809	0.84059	0.0503807	2.13623e-06
rs11748902	G	C	5	167709235	0.166533	0.0515241	0.0370843	7.10052e-06
rs11789010	C	T	9	80129910	-0.0991024	0.24116	0.0190993	2.11667e-07
rs1258842	T	A	11	134167225	-0.0766574	0.37594	0.0167781	4.90289e-06
rs12653554	A	T	5	118255998	0.141552	0.0716253	0.031837	8.74244e-06
rs13019272	A	G	2	160658863	0.0744021	0.515787	0.0161086	3.86004e-06
rs2210174	T	C	14	83600010	-0.0783426	0.628314	0.0170577	4.37352e-06
rs57070158	C	A	13	29048828	-0.112351	0.120797	0.0249714	6.82194e-06
rs61217796	G	A	4	160643088	-0.114005	0.119451	0.0253115	6.66624e-06
rs66973779	A	G	15	89340942	0.083771	0.313274	0.0184652	5.71427e-06
rs72963797	A	G	18	73896030	-0.11612	0.114503	0.0257345	6.41442e-06
rs73106151	G	A	3	71229328	-0.152218	0.061284	0.0335422	5.67582e-06
rs7404803	C	T	16	15530454	-0.128686	0.889108	0.0258429	6.3729e-07
rs7819696	T	C	8	56349334	0.109169	0.165883	0.0222639	9.41909e-07
rs7985034	C	T	13	110370464	-0.0954725	0.239139	0.0198699	1.5485e-06
rs117662076	A	G	10	120769498	0.40355	0.0551947	0.0882902	4.86048e-06
rs12534702	T	C	7	36769290	0.177922	0.344151	0.0399738	8.54874e-06
rs1265300	G	A	6	4456400	-0.177503	0.503447	0.0385789	4.20388e-06
rs12896430	A	G	14	21431376	-0.192312	0.687717	0.0420479	4.79347e-06
rs16845299	T	C	4	71520630	0.266974	0.262023	0.0538601	7.16645e-07
rs17111728	C	T	1	55691384	0.3336	0.0711268	0.072423	4.09959e-06
rs3776996	A	G	5	153797049	0.241028	0.171479	0.0495792	1.16512e-06
rs412657	G	T	6	32211085	-0.175941	0.404577	0.0388333	5.87996e-06
rs76194327	A	T	3	116352196	0.379903	0.0642392	0.0854692	8.79296e-06
rs9960494	C	G	18	51206632	-0.190905	0.337762	0.042414	6.76362e-06
rs11772301	T	G	7	68426852	0.223141	0.15548	0.0501194	8.50027e-06
rs13168379	A	G	5	173382761	-0.426245	0.0608517	0.0794848	8.20347e-08
rs259203	G	A	7	89055849	-0.219736	0.703748	0.0424059	2.19844e-07
rs2690011	T	C	1	15237140	-0.297238	0.904905	0.0638288	3.21161e-06
rs36017291	C	A	16	17420514	0.169229	0.442014	0.0367915	4.23174e-06
rs4964509	T	C	12	107357058	-0.160986	0.418803	0.0364344	9.93814e-06
rs62516876	G	A	8	56769381	0.232126	0.154999	0.0516597	7.01036e-06
rs73068710	A	G	12	13091573	0.290597	0.0915007	0.0636582	4.99595e-06
rs7314394	C	T	12	27152666	-0.326054	0.918665	0.0676043	1.41431e-06
rs7526994	C	G	1	209121467	-0.18893	0.288414	0.0413852	4.99136e-06
rs7648378	A	G	3	3364182	-0.244486	0.152132	0.0532914	4.48129e-06
rs79975503	C	A	2	173193150	-0.354071	0.0629941	0.0772714	4.60153e-06
rs917158	A	G	7	141040182	0.18946	0.464947	0.0360154	1.43647e-07
rs9399647	T	G	6	148627309	-0.177798	0.648588	0.0383641	3.57843e-06
rs11804833	T	C	1	168663055	-0.126683	0.151584	0.0278625	5.44864e-06
rs1882135	G	T	12	116769600	-0.090728	0.354587	0.020247	7.42745e-06
rs2347496	G	T	8	32288932	-0.0930453	0.39951	0.0197255	2.39338e-06
rs258816	A	C	5	142590414	0.100039	0.399475	0.0211144	2.15871e-06
rs28393833	T	C	18	3206552	-0.111547	0.202463	0.0249138	7.55904e-06
rs35025485	A	G	6	148770331	0.19416	0.0732338	0.03752	2.28108e-07
rs6105994	A	G	20	18929774	0.0931033	0.373708	0.0205603	5.94564e-06
rs62024270	A	G	16	11669568	0.100571	0.371821	0.020125	5.81246e-07
rs62165977	T	C	2	76632661	0.117901	0.168383	0.0259445	5.50986e-06
rs6701211	A	G	1	214682808	-0.17341	0.0730063	0.0385777	6.95393e-06
rs7746214	A	G	6	121220067	0.102716	0.743589	0.0224918	4.95238e-06
rs11850002	C	A	14	42509970	-0.130019	0.290347	0.028663	5.72937e-06
rs2303658	A	G	12	20278430	-0.127219	0.332114	0.0283984	7.47132e-06
rs55751855	G	A	11	113955970	0.134359	0.299801	0.0290493	3.74216e-06
rs67391746	C	T	16	61675825	-0.162536	0.157817	0.0362279	7.24029e-06
rs76411331	T	C	3	21259066	-0.19787	0.106517	0.0443618	8.18222e-06
rs7787688	T	C	7	22807884	-0.130716	0.4232	0.0274759	1.96029e-06
rs7797421	T	C	7	19286182	0.16619	0.185171	0.0354633	2.7825e-06
rs11858399	T	C	15	93596061	-0.189446	0.163698	0.0397457	1.87491e-06
rs17398712	C	G	3	60243843	0.186816	0.156544	0.0394039	2.12612e-06
rs67194754	G	A	1	195501149	0.14313	0.278666	0.031489	5.48304e-06
rs7073292	G	A	10	10139363	0.148601	0.374935	0.0308155	1.4193e-06
rs72662817	G	A	1	30603043	0.178862	0.181412	0.0404592	9.83367e-06
rs79201749	A	G	4	11169139	-0.246343	0.0910655	0.0531684	3.59958e-06
rs9356977	A	C	6	25454869	0.138489	0.645475	0.0299489	3.76066e-06
rs12039057	G	A	1	181338339	-0.105024	0.284067	0.0236295	8.80538e-06
rs315026	G	A	1	77041173	-0.101553	0.313019	0.0228013	8.43617e-06
rs35903463	T	A	13	85599144	0.16143	0.107979	0.0350324	4.06502e-06
rs36131910	A	G	4	150277279	0.235299	0.052841	0.0485794	1.27507e-06
rs4939587	G	T	18	47142173	-0.132439	0.193687	0.0266022	6.40834e-07
rs72896141	A	G	11	5845481	-0.171682	0.11407	0.0366461	2.80156e-06
rs7402939	C	T	15	99183876	0.104932	0.631239	0.0224615	2.98788e-06
rs74564383	T	C	10	59135772	-0.225762	0.0507443	0.0487175	3.58482e-06
rs12098699	G	A	10	64396790	-0.158097	0.210189	0.0331076	1.79492e-06
rs1321631	G	A	1	34348912	-0.232995	0.0931154	0.0480959	1.27004e-06
rs35200886	A	G	1	222927951	-0.168061	0.173258	0.0363491	3.77292e-06
rs4268390	G	A	1	81927648	0.260285	0.0683627	0.0570981	5.15052e-06
rs79207650	A	G	1	154374162	-0.266917	0.0641043	0.0588837	5.81657e-06
rs12197028	G	A	6	102128843	0.145198	0.0859036	0.032165	6.35681e-06
rs12415307	G	A	10	103076252	-0.0858008	0.289391	0.0183852	3.05879e-06
rs2107539	T	C	17	34322610	-0.0985761	0.243401	0.021844	6.39983e-06
rs36720	C	T	19	16567351	-0.0785738	0.306358	0.0176922	8.94731e-06
rs3785822	A	G	17	59556923	0.099713	0.178193	0.0211127	2.32516e-06
rs61798216	G	A	4	36459051	-0.127347	0.113551	0.0264628	1.49196e-06
rs74949229	A	G	10	9526946	-0.137861	0.0939624	0.0283694	1.17685e-06
rs840787	G	C	2	65775890	-0.076066	0.372348	0.0167144	5.34137e-06
rs12254965	G	A	10	127297038	-0.194969	0.139658	0.0437944	8.51087e-06
rs56162052	C	T	17	36205502	-0.1566	0.724504	0.0334111	2.77143e-06
rs7132825	A	G	12	1500603	0.225746	0.0870785	0.0503199	7.24961e-06
rs12254965	G	A	10	127297038	-0.194897	0.139658	0.0437944	8.57587e-06
rs56162052	C	T	17	36205502	-0.156607	0.724504	0.033411	2.76868e-06
rs7132825	A	G	12	1500603	0.22574	0.0870785	0.0503199	7.25415e-06
rs12329315	T	C	2	208229501	-0.209102	0.357606	0.0459396	5.32196e-06
rs148177109	T	C	1	18911722	-0.49518	0.0507931	0.10768	4.25252e-06
rs35529952	T	C	8	89606888	0.281134	0.161249	0.0597813	2.56734e-06
rs3801563	T	C	7	83226255	-0.406416	0.0698842	0.0860253	2.30821e-06
rs12418335	C	G	11	77517745	-0.0832976	0.383409	0.0183744	5.80535e-06
rs2273934	G	A	10	112653664	-0.167222	0.0652347	0.0367504	5.35928e-06
rs7630416	A	C	3	67305449	0.0958709	0.618442	0.0197414	1.19568e-06
rs77776469	A	T	13	44700784	-0.193856	0.0739975	0.038383	4.40535e-07
rs12449080	G	C	16	73660160	0.0865938	0.664356	0.0178388	1.2085e-06
rs12602625	C	G	17	65679135	-0.165344	0.058124	0.0370085	7.9056e-06
rs2008778	A	C	17	36156378	-0.0979854	0.219845	0.0215634	5.51801e-06
rs2465095	G	A	2	137536904	-0.081979	0.417237	0.0166906	9.02936e-07
rs2700958	A	G	7	36134000	0.131146	0.0912533	0.0296124	9.47834e-06
rs3106091	C	T	2	200881067	0.0829122	0.680953	0.0180151	4.17683e-06
rs35445518	C	A	19	46908968	0.0910549	0.769202	0.0204101	8.14778e-06
rs4294998	C	A	2	228912194	0.0742452	0.505929	0.016781	9.67258e-06
rs55712042	G	A	4	2706103	0.0749687	0.536767	0.0168865	9.01379e-06
rs12449080	G	C	16	73660160	0.0866379	0.664356	0.0178384	1.19282e-06
rs12602625	C	G	17	65679135	-0.165436	0.058124	0.0370076	7.80968e-06
rs2008778	A	C	17	36156378	-0.0979307	0.219845	0.0215629	5.58195e-06
rs2465095	G	A	2	137536904	-0.0819963	0.417237	0.0166902	8.97639e-07
rs2700958	A	G	7	36134000	0.131086	0.0912533	0.0296117	9.56313e-06
rs3106091	C	T	2	200881067	0.0828995	0.680953	0.0180146	4.18877e-06
rs35445518	C	A	19	46908968	0.0909857	0.769202	0.0204096	8.27351e-06
rs4294998	C	A	2	228912194	0.0741667	0.505929	0.0167806	9.87957e-06
rs55712042	G	A	4	2706103	0.0749093	0.536767	0.0168861	9.15782e-06
rs12449080	G	C	16	73660160	0.086934	0.664356	0.0178413	1.10119e-06
rs12602625	C	G	17	65679135	-0.16527	0.058124	0.0370136	8.00239e-06
rs2008778	A	C	17	36156378	-0.0981686	0.219845	0.0215664	5.31549e-06
rs203770	C	T	2	200897873	-0.0823321	0.32844	0.0178522	3.99046e-06
rs2465095	G	A	2	137536904	-0.0817186	0.417237	0.0166929	9.80985e-07
rs2700958	A	G	7	36134000	0.131635	0.0912533	0.0296165	8.80264e-06
rs35445518	C	A	19	46908968	0.0910584	0.769202	0.0204129	8.16455e-06
rs55712042	G	A	4	2706103	0.0752817	0.536767	0.0168888	8.29244e-06
rs1245457	T	G	14	27666390	-0.284764	0.92666	0.0633653	6.98962e-06
rs141306664	G	A	2	103065467	-0.345992	0.0503485	0.0762136	5.63178e-06
rs35315167	T	C	11	20188946	-0.341169	0.0508565	0.0757681	6.70614e-06
rs12580899	C	G	12	125409716	-0.252223	0.16696	0.0546145	3.86992e-06
rs35948646	A	G	3	132512280	0.220754	0.261115	0.0469154	2.5341e-06
rs6953241	G	A	7	6203231	-0.280431	0.143714	0.0610176	4.30887e-06
rs76993859	G	A	9	26245338	-0.379147	0.0665616	0.0842051	6.71073e-06
rs79651411	C	T	5	106428974	-0.354719	0.0809987	0.0802928	9.97046e-06
rs80133499	A	C	18	6265012	0.388075	0.078645	0.0868196	7.82552e-06
rs12592099	C	G	15	31763818	-0.0967904	0.334082	0.0208836	3.57359e-06
rs2087796	C	T	1	40290277	0.109263	0.773341	0.0234779	3.25766e-06
rs4834490	C	T	4	116389731	-0.102556	0.752106	0.0228527	7.20014e-06
rs6871001	C	T	5	98674510	0.0891786	0.435941	0.0195236	4.93023e-06
rs7112918	C	T	11	1690969	0.0890031	0.469469	0.0198129	7.04996e-06
rs72697383	A	C	1	117273912	0.13667	0.14746	0.0279205	9.83225e-07
rs76557325	G	A	5	76299200	-0.166509	0.0796945	0.0373612	8.32204e-06
rs778342	A	G	2	233798155	0.170187	0.0821165	0.036489	3.10024e-06
rs8006559	G	A	14	88053855	-0.206063	0.0511182	0.0445341	3.70869e-06
rs12617695	T	C	2	2894009	-0.2545	0.11152	0.0570862	8.26649e-06
rs12879040	A	G	14	93123991	-0.175377	0.324977	0.0389933	6.8715e-06
rs1357368	T	C	2	216625794	0.219779	0.268075	0.0430468	3.29781e-07
rs2898012	G	A	5	56719668	0.181674	0.732202	0.0397493	4.86606e-06
rs3973922	C	A	7	71112510	0.174374	0.675078	0.0387882	6.93974e-06
rs8006060	G	A	14	52768125	-0.242375	0.130169	0.0533469	5.53604e-06
rs12637754	G	A	3	69840865	-0.295809	0.130241	0.0665444	8.77701e-06
rs2966752	G	A	5	109401940	0.209792	0.594667	0.044229	2.10249e-06
rs62481637	C	T	8	3804179	0.310466	0.118952	0.0668346	3.3961e-06
rs7553861	G	T	1	25484633	-0.205731	0.662171	0.0450735	5.01052e-06
rs12637754	G	A	3	69840865	-0.295454	0.130241	0.0665076	8.89565e-06
rs2966752	G	A	5	109401940	0.210409	0.594667	0.0442046	1.93694e-06
rs62481637	C	T	8	3804179	0.3088	0.118952	0.0667977	3.78399e-06
rs7553861	G	T	1	25484633	-0.206579	0.662171	0.0450486	4.52482e-06
rs12657476	T	C	5	150566196	-0.0931547	0.459629	0.019803	2.55016e-06
rs12870360	A	G	13	49405223	-0.0847702	0.442716	0.0191442	9.51157e-06
rs2421570	A	G	11	34052765	-0.0884542	0.363422	0.0198105	8.00612e-06
rs4503137	T	G	8	17991955	0.0964986	0.718361	0.0206581	2.99401e-06
rs55749361	T	A	21	28158333	-0.158693	0.0862231	0.0352357	6.67614e-06
rs6005414	A	G	22	27783185	0.0822546	0.509002	0.0185732	9.48182e-06
rs6745806	G	A	2	139296037	-0.167427	0.935626	0.0376791	8.85015e-06
rs7088001	G	A	10	113295291	0.121321	0.130522	0.0269851	6.92956e-06
rs72799593	T	C	16	84948251	0.157054	0.0830449	0.0339477	3.7217e-06
rs73654027	C	G	9	94443717	0.138723	0.114452	0.029459	2.48893e-06
rs7930251	T	C	11	111155302	-0.0870117	0.341935	0.0193783	7.11677e-06
rs9517773	G	A	13	100217440	-0.114611	0.188886	0.025178	5.31308e-06
rs12710731	T	C	2	16720355	0.0910033	0.290693	0.019938	5.0115e-06
rs1298928	G	T	5	118836004	0.106723	0.182956	0.0236369	6.32938e-06
rs1532932	G	A	16	10082174	-0.100048	0.786723	0.0223097	7.30848e-06
rs2523176	T	C	19	2272309	0.10972	0.204089	0.0241811	5.69447e-06
rs35895642	T	C	15	37816202	0.109922	0.198579	0.0229031	1.59122e-06
rs36119306	T	A	6	37707962	0.108922	0.197307	0.0234519	3.40912e-06
rs4075877	T	C	11	67567936	-0.0853202	0.586452	0.0189653	6.83557e-06
rs4670221	G	C	2	38050232	-0.0902391	0.308248	0.020143	7.46681e-06
rs55926131	T	C	12	115085267	-0.105925	0.611517	0.0202555	1.70043e-07
rs68058313	T	C	5	24990890	0.190878	0.0641869	0.0392882	1.1833e-06
rs6823767	C	T	4	151295085	0.0928428	0.261341	0.0207196	7.43207e-06
rs79041579	A	G	17	47860915	0.127155	0.1829	0.0244433	1.9709e-07
rs7912369	G	A	10	2005604	0.0884855	0.702824	0.0199341	9.04193e-06
rs9368149	G	A	6	20097305	-0.124406	0.172487	0.0259934	1.70068e-06
rs12710731	T	C	2	16720355	0.0909052	0.290693	0.0199384	5.13256e-06
rs1298928	G	T	5	118836004	0.106836	0.182956	0.0236374	6.19021e-06
rs1532932	G	A	16	10082174	-0.0999736	0.786723	0.0223101	7.42641e-06
rs2523176	T	C	19	2272309	0.109575	0.204089	0.0241815	5.86081e-06
rs35895642	T	C	15	37816202	0.109943	0.198579	0.0229035	1.58454e-06
rs36119306	T	A	6	37707962	0.108913	0.197307	0.0234524	3.4172e-06
rs4075877	T	C	11	67567936	-0.0852424	0.586452	0.0189657	6.97158e-06
rs4670221	G	C	2	38050232	-0.0902038	0.308248	0.0201434	7.53145e-06
rs55926131	T	C	12	115085267	-0.105931	0.611517	0.0202559	1.69828e-07
rs68058313	T	C	5	24990890	0.191014	0.0641869	0.039289	1.16343e-06
rs6823767	C	T	4	151295085	0.0928291	0.261341	0.0207199	7.45799e-06
rs79041579	A	G	17	47860915	0.127241	0.1829	0.0244437	1.93488e-07
rs7912369	G	A	10	2005604	0.088377	0.702824	0.0199345	9.27693e-06
rs9368149	G	A	6	20097305	-0.124435	0.172487	0.0259939	1.69206e-06
rs12710731	T	C	2	16720355	0.0909006	0.290693	0.0199385	5.13826e-06
rs1298928	G	T	5	118836004	0.106828	0.182956	0.0236374	6.20019e-06
rs1532932	G	A	16	10082174	-0.099981	0.786723	0.0223102	7.41504e-06
rs2523176	T	C	19	2272309	0.10957	0.204089	0.0241816	5.86649e-06
rs35895642	T	C	15	37816202	0.109955	0.198579	0.0229035	1.58046e-06
rs36119306	T	A	6	37707962	0.10891	0.197307	0.0234524	3.41969e-06
rs4075877	T	C	11	67567936	-0.0852342	0.586452	0.0189657	6.98598e-06
rs4670221	G	C	2	38050232	-0.0901992	0.308248	0.0201434	7.53973e-06
rs55926131	T	C	12	115085267	-0.105929	0.611517	0.0202559	1.69929e-07
rs68058313	T	C	5	24990890	0.190993	0.0641869	0.039289	1.16664e-06
rs6823767	C	T	4	151295085	0.0928213	0.261341	0.02072	7.47136e-06
rs79041579	A	G	17	47860915	0.127237	0.1829	0.0244437	1.93689e-07
rs7912369	G	A	10	2005604	0.088363	0.702824	0.0199345	9.30737e-06
rs9368149	G	A	6	20097305	-0.124432	0.172487	0.0259939	1.69311e-06
rs12710731	T	C	2	16720355	0.0907615	0.290693	0.0199387	5.31295e-06
rs1298928	G	T	5	118836004	0.107047	0.182956	0.0236377	5.93596e-06
rs1532932	G	A	16	10082174	-0.0995889	0.786723	0.0223104	8.05212e-06
rs2523176	T	C	19	2272309	0.110284	0.204089	0.0241818	5.10001e-06
rs35895642	T	C	15	37816202	0.109958	0.198579	0.0229038	1.5799e-06
rs36119306	T	A	6	37707962	0.10858	0.197307	0.0234526	3.66112e-06
rs4075877	T	C	11	67567936	-0.0845547	0.586452	0.0189659	8.26333e-06
rs4670221	G	C	2	38050232	-0.0903199	0.308248	0.0201436	7.33244e-06
rs55926131	T	C	12	115085267	-0.106116	0.611517	0.0202561	1.61726e-07
rs68058313	T	C	5	24990890	0.191654	0.0641869	0.0392894	1.07161e-06
rs79041579	A	G	17	47860915	0.127401	0.1829	0.024444	1.86847e-07
rs7912369	G	A	10	2005604	0.0885333	0.702824	0.0199347	8.94722e-06
rs9368149	G	A	6	20097305	-0.124355	0.172487	0.0259942	1.71863e-06
rs12710731	T	C	2	16720355	0.0908998	0.290693	0.0199385	5.13932e-06
rs1298928	G	T	5	118836004	0.106841	0.182956	0.0236374	6.18466e-06
rs1532932	G	A	16	10082174	-0.0999825	0.786723	0.0223102	7.41284e-06
rs2523176	T	C	19	2272309	0.109566	0.204089	0.0241816	5.87114e-06
rs35895642	T	C	15	37816202	0.109956	0.198579	0.0229035	1.58024e-06
rs36119306	T	A	6	37707962	0.108908	0.197307	0.0234524	3.42085e-06
rs4075877	T	C	11	67567936	-0.0852446	0.586452	0.0189657	6.96798e-06
rs4670221	G	C	2	38050232	-0.0901928	0.308248	0.0201434	7.55088e-06
rs55926131	T	C	12	115085267	-0.105935	0.611517	0.0202559	1.69659e-07
rs68058313	T	C	5	24990890	0.190994	0.0641869	0.039289	1.16641e-06
rs6823767	C	T	4	151295085	0.0928282	0.261341	0.02072	7.45973e-06
rs79041579	A	G	17	47860915	0.127245	0.1829	0.0244438	1.93354e-07
rs7912369	G	A	10	2005604	0.0883668	0.702824	0.0199345	9.29928e-06
rs9368149	G	A	6	20097305	-0.12443	0.172487	0.0259939	1.69398e-06
rs12710731	T	C	2	16720355	0.0908999	0.290693	0.0199385	5.13919e-06
rs1298928	G	T	5	118836004	0.106846	0.182956	0.0236374	6.17828e-06
rs1532932	G	A	16	10082174	-0.0999821	0.786723	0.0223102	7.4134e-06
rs2523176	T	C	19	2272309	0.109569	0.204089	0.0241816	5.86781e-06
rs35895642	T	C	15	37816202	0.109958	0.198579	0.0229035	1.57958e-06
rs36119306	T	A	6	37707962	0.108912	0.197307	0.0234524	3.41821e-06
rs4075877	T	C	11	67567936	-0.0852507	0.586452	0.0189657	6.95748e-06
rs4670221	G	C	2	38050232	-0.0901857	0.308248	0.0201434	7.56346e-06
rs55926131	T	C	12	115085267	-0.105945	0.611517	0.020256	1.69222e-07
rs68058313	T	C	5	24990890	0.191006	0.0641869	0.039289	1.16469e-06
rs6823767	C	T	4	151295085	0.0928241	0.261341	0.02072	7.46675e-06
rs79041579	A	G	17	47860915	0.127256	0.1829	0.0244438	1.92872e-07
rs7912369	G	A	10	2005604	0.088365	0.702824	0.0199345	9.30323e-06
rs9368149	G	A	6	20097305	-0.124428	0.172487	0.0259939	1.69456e-06
rs12807499	A	G	11	132632108	0.129032	0.0985692	0.0283876	5.48393e-06
rs1452438	G	A	15	87379693	-0.0811965	0.716886	0.0179508	6.08889e-06
rs1890115	T	G	9	85165993	0.11834	0.110317	0.0258878	4.84826e-06
rs1939678	G	A	11	115692040	0.0722317	0.508082	0.0163446	9.90214e-06
rs2449527	A	G	8	98755721	0.0850013	0.248582	0.0189826	7.54009e-06
rs36042240	C	G	2	242127334	0.125081	0.100968	0.0279507	7.63947e-06
rs4333970	A	G	10	82726856	0.0872277	0.734925	0.018424	2.19646e-06
rs6021385	C	G	20	50306537	-0.0816426	0.29233	0.0180696	6.23617e-06
rs6695790	G	T	1	158052966	-0.080517	0.522521	0.0165939	1.22092e-06
rs72645666	A	G	8	56351168	0.079789	0.299503	0.0177283	6.77484e-06
rs12913320	T	C	15	89377788	-0.0932645	0.236869	0.0208999	8.10295e-06
rs13009600	A	G	2	211772624	0.0773765	0.382966	0.0174601	9.3525e-06
rs2579005	G	T	2	216484768	0.0910688	0.70095	0.01924	2.20896e-06
rs2990682	G	C	1	13839382	0.0864227	0.304692	0.0187368	3.97945e-06
rs6958516	C	G	7	158240602	-0.090388	0.305548	0.0189915	1.94179e-06
rs77848425	T	C	4	186557727	0.12911	0.106589	0.0284778	5.79565e-06
rs12955365	G	T	18	75219184	-0.087128	0.394177	0.0190616	4.85735e-06
rs182549	T	C	2	136616754	-0.139995	0.756083	0.0191017	2.32064e-13
rs2197344	C	G	6	92899617	-0.0843355	0.616961	0.0165228	3.32206e-07
rs318801	A	G	5	55410143	-0.103544	0.176296	0.023416	9.78114e-06
rs35344390	T	C	5	79628446	0.0894189	0.236588	0.0191949	3.18561e-06
rs6044857	G	A	20	17496742	0.0799424	0.389459	0.0168998	2.2411e-06
rs61939486	C	T	12	119663906	-0.125022	0.149904	0.0235191	1.06219e-07
rs74452406	T	C	3	63012872	-0.150306	0.0727759	0.0326799	4.2381e-06
rs795981	T	C	4	140802689	-0.119776	0.119956	0.0269253	8.64958e-06
rs926010	A	C	15	24038174	0.104151	0.76559	0.0205103	3.81448e-07
rs12955365	G	T	18	75219184	-0.0871341	0.394177	0.0190617	4.85019e-06
rs182549	T	C	2	136616754	-0.139992	0.756083	0.0191018	2.32292e-13
rs2197344	C	G	6	92899617	-0.0843425	0.616961	0.0165228	3.31484e-07
rs318801	A	G	5	55410143	-0.103537	0.176296	0.023416	9.79498e-06
rs35344390	T	C	5	79628446	0.0894152	0.236588	0.0191949	3.18875e-06
rs6044857	G	A	20	17496742	0.0799453	0.389459	0.0168999	2.23929e-06
rs61939486	C	T	12	119663906	-0.125014	0.149904	0.0235191	1.06422e-07
rs74452406	T	C	3	63012872	-0.150322	0.0727759	0.03268	4.2285e-06
rs795981	T	C	4	140802689	-0.119768	0.119956	0.0269254	8.66137e-06
rs926010	A	C	15	24038174	0.104148	0.76559	0.0205103	3.81794e-07
rs12978412	T	C	19	47945391	0.131438	0.642572	0.029497	8.35076e-06
rs2535959	C	A	7	152617231	0.143092	0.410513	0.0298528	1.64107e-06
rs3000780	A	G	1	227597496	0.157741	0.264242	0.0323493	1.08169e-06
rs4462945	T	C	3	10271265	0.232309	0.086454	0.0513481	6.06229e-06
rs7159466	T	A	14	62519026	0.26032	0.0719354	0.0562116	3.6377e-06
rs72743290	T	C	1	205234393	0.234635	0.0996657	0.0496037	2.24302e-06
rs9847942	A	G	3	32349650	-0.214949	0.101421	0.0461112	3.13846e-06
rs13045121	T	C	20	52378642	0.135832	0.0884981	0.0306208	9.16784e-06
rs2571	T	G	9	115926317	-0.114098	0.125637	0.0253383	6.70087e-06
rs2774282	C	T	1	114648020	0.0851111	0.76057	0.0190867	8.22778e-06
rs28414316	C	T	2	122972140	0.11471	0.140049	0.0238939	1.58039e-06
rs4278144	C	A	8	62697207	0.0771407	0.351387	0.0172751	7.99087e-06
rs505128	C	T	11	116273511	-0.0790377	0.353603	0.0170436	3.52868e-06
rs56178001	C	G	7	5362944	-0.0830545	0.707901	0.0181165	4.55164e-06
rs61510729	A	G	12	109709157	-0.100363	0.171943	0.021973	4.9343e-06
rs62365577	C	G	5	83033300	-0.117269	0.123856	0.0257621	5.31413e-06
rs680138	T	C	9	110882980	-0.0806974	0.617925	0.0171227	2.44217e-06
rs71446723	A	G	12	20934000	0.11298	0.124427	0.0249481	5.93743e-06
rs73046099	A	G	7	709469	-0.126414	0.110042	0.0269081	2.62736e-06
rs742682	C	A	1	114897076	-0.110503	0.132617	0.0242162	5.03879e-06
rs80306758	C	A	7	27255650	0.165091	0.061056	0.0366619	6.69757e-06
rs9564193	G	A	13	65333539	-0.174504	0.0508343	0.0390242	7.75993e-06
rs13061928	G	A	3	2932365	-0.17875	0.192297	0.0393115	5.44119e-06
rs1872436	T	C	12	57322492	-0.181533	0.191344	0.0369281	8.83998e-07
rs5768347	G	T	22	48492960	-0.1688	0.823431	0.0378678	8.28827e-06
rs77544959	A	G	11	39603353	-0.149358	0.285411	0.0329458	5.8031e-06
rs9513795	T	C	13	101402225	0.159167	0.203817	0.0358491	8.9994e-06
rs9848037	G	A	3	55796723	0.149789	0.739047	0.0333494	7.07276e-06
rs13061928	G	A	3	2932365	-0.17866	0.192297	0.0393665	5.66924e-06
rs1872436	T	C	12	57322492	-0.181354	0.191344	0.0369798	9.38338e-07
rs5768347	G	T	22	48492960	-0.168458	0.823431	0.0379208	8.89759e-06
rs77544959	A	G	11	39603353	-0.150339	0.285411	0.0329919	5.19274e-06
rs9848037	G	A	3	55796723	0.148681	0.739047	0.0333961	8.50541e-06
rs13086575	T	G	3	61955356	0.188513	0.190642	0.0416983	6.1585e-06
rs6900225	A	G	6	9314807	0.171261	0.760794	0.0374141	4.70691e-06
rs74654613	C	T	2	48683323	-0.215225	0.15952	0.0433164	6.74162e-07
rs7524171	G	A	1	3279324	0.137994	0.538948	0.0308824	7.88152e-06
rs13127387	A	G	4	136618495	0.129909	0.349386	0.0283014	4.42804e-06
rs17665612	G	C	4	31738007	0.17422	0.148523	0.0379599	4.4414e-06
rs2121787	G	A	3	76667574	0.228807	0.0838426	0.0510771	7.47682e-06
rs2568643	A	G	7	13765237	0.131633	0.295225	0.0289862	5.59232e-06
rs4883997	G	C	13	75994692	0.203883	0.912648	0.0459584	9.1537e-06
rs57978465	A	G	4	38659457	0.223943	0.0799417	0.0505637	9.46988e-06
rs62006238	T	C	15	46098409	0.274038	0.0742713	0.0534904	3.00524e-07
rs7217715	A	G	17	30059363	-0.138197	0.233719	0.0309403	7.9483e-06
rs7289868	T	G	22	45253872	0.123249	0.411824	0.0263401	2.88068e-06
rs76776955	C	G	3	4084517	-0.207417	0.104915	0.0451065	4.25771e-06
rs7720468	A	G	5	31061463	-0.165604	0.172441	0.0374082	9.55807e-06
rs8013597	G	A	14	42477049	0.152996	0.22529	0.030965	7.7753e-07
rs856250	G	A	14	97493057	0.177245	0.12838	0.0399176	8.98415e-06
rs894795	T	C	7	135562501	0.118869	0.522454	0.0265788	7.73764e-06
rs13236023	A	G	7	21591664	0.136667	0.438839	0.0305984	7.95216e-06
rs7334276	C	T	13	43399563	0.196266	0.152166	0.0428465	4.6348e-06
rs888195	C	G	12	2834412	0.159694	0.335821	0.031906	5.58235e-07
rs13381162	T	G	18	56945042	0.0903404	0.319755	0.0195139	3.66491e-06
rs13393033	T	C	2	6718574	-0.0878362	0.338139	0.0188258	3.07502e-06
rs3786306	T	C	18	11879825	-0.110537	0.193602	0.0250167	9.9375e-06
rs4935713	T	C	10	52259742	0.0939735	0.233758	0.0210477	8.01472e-06
rs56168514	G	A	12	89922621	0.141409	0.0982975	0.029828	2.1285e-06
rs592284	T	G	10	117132048	-0.12505	0.882034	0.028126	8.74557e-06
rs7155195	C	T	14	86046850	-0.09121	0.572076	0.0186142	9.58207e-07
rs72643019	A	G	13	88663116	0.17014	0.0624043	0.0376019	6.04588e-06
rs73083250	A	G	3	195951391	-0.0999442	0.20771	0.0222453	7.02817e-06
rs7944200	T	C	11	28702277	-0.0860419	0.595764	0.0178153	1.36767e-06
rs852540	A	G	7	5592436	0.137914	0.0885402	0.0311773	9.70893e-06
rs9573198	C	G	13	74008908	0.103765	0.180697	0.0230625	6.81776e-06
rs139901450	T	C	9	35597685	0.182533	0.0554398	0.0405495	6.74813e-06
rs4503137	T	G	8	17991955	0.0928319	0.717768	0.0204764	5.79824e-06
rs6005414	A	G	22	27783185	0.087569	0.508609	0.0183949	1.9311e-06
rs6745806	G	A	2	139296037	-0.166005	0.93549	0.0372502	8.33083e-06
rs73654027	C	G	9	94443717	0.132515	0.114751	0.0291489	5.46414e-06
rs9517773	G	A	13	100217440	-0.110907	0.18938	0.0249114	8.50491e-06
rs1421280	T	C	13	72726920	-0.106525	0.797239	0.0234422	5.51542e-06
rs61790480	T	G	3	170532111	0.165737	0.0765938	0.0362025	4.69341e-06
rs6478652	T	G	9	126987143	-0.105694	0.230048	0.0229013	3.92764e-06
rs7179502	A	G	15	101478959	0.101697	0.264105	0.0218773	3.3436e-06
rs1421280	T	C	13	72726920	-0.104294	0.797244	0.0234077	8.36846e-06
rs61790480	T	G	3	170532111	0.164248	0.0766359	0.0361573	5.55631e-06
rs6478652	T	G	9	126987143	-0.104323	0.229972	0.0228817	5.13388e-06
rs7179502	A	G	15	101478959	0.102337	0.26408	0.0218584	2.8437e-06
rs143528380	T	C	4	100462085	-0.166716	0.0514353	0.0370242	6.70367e-06
rs2241820	T	C	12	54394497	-0.077173	0.560013	0.0163185	2.25419e-06
rs3118528	G	A	9	137338430	-0.0933371	0.403079	0.0210221	8.99786e-06
rs6459977	G	A	7	155797686	-0.0834013	0.693191	0.0188709	9.88939e-06
rs6489044	C	T	12	126554565	-0.077538	0.658809	0.0171743	6.33839e-06
rs77715803	A	G	14	37075839	-0.102709	0.149407	0.0228548	6.98967e-06
rs874372	G	C	10	98247143	0.112555	0.879288	0.0250319	6.90921e-06
rs148883344	A	C	2	16345561	0.214048	0.0848704	0.0456884	2.8001e-06
rs609909	C	G	9	12866508	-0.2575	0.946447	0.0542358	2.05654e-06
rs62529678	A	G	8	84315197	0.118961	0.286471	0.0267512	8.70993e-06
rs72682613	T	C	4	122877809	-0.138041	0.186661	0.0307687	7.24293e-06
rs73546364	T	C	13	37318533	-0.218902	0.0705586	0.0480583	5.24038e-06
rs7532302	T	C	1	156659768	-0.121914	0.667952	0.0252893	1.43016e-06
rs9347737	G	A	6	163740322	-0.108741	0.422944	0.0244454	8.65456e-06
rs148883344	A	C	2	16345561	0.212645	0.0848704	0.0457604	3.36913e-06
rs609909	C	G	9	12866508	-0.255589	0.946447	0.0543213	2.53699e-06
rs62529678	A	G	8	84315197	0.118588	0.286471	0.0267934	9.59805e-06
rs72682613	T	C	4	122877809	-0.136352	0.186661	0.0308172	9.66522e-06
rs73546364	T	C	13	37318533	-0.221358	0.0705586	0.0481341	4.2497e-06
rs7532302	T	C	1	156659768	-0.122325	0.667952	0.0253292	1.36931e-06
rs9347737	G	A	6	163740322	-0.108442	0.422944	0.0244839	9.46293e-06
rs1576176	C	A	1	98911950	-0.168022	0.27476	0.0380378	9.99697e-06
rs17049177	A	G	2	129915467	-0.266492	0.112621	0.0540994	8.39435e-07
rs616801	A	G	1	95011698	0.239717	0.120176	0.0533128	6.91071e-06
rs888195	C	G	12	2834412	0.161843	0.332147	0.034311	2.39405e-06
rs17049177	A	G	2	129915467	-0.259548	0.110945	0.0538955	1.46641e-06
rs616801	A	G	1	95011698	0.247127	0.119849	0.0529429	3.04427e-06
rs709159	A	C	3	12481203	-0.173535	0.759341	0.0376231	3.97942e-06
rs80010435	A	G	9	140767792	-0.324559	0.0533435	0.0731352	9.08874e-06
rs888195	C	G	12	2834412	0.165585	0.331862	0.0339776	1.09715e-06
rs9268614	G	T	6	32402778	-0.186289	0.200868	0.0404122	4.03198e-06
rs17087572	A	C	6	156914422	-0.0964172	0.255798	0.0209723	4.27863e-06
rs215996	C	G	12	2719297	-0.11075	0.152519	0.0240367	4.07505e-06
rs2225380	C	A	14	83605637	-0.0894148	0.688409	0.0188625	2.13351e-06
rs35004779	T	C	3	177893936	0.0807293	0.421728	0.0175514	4.2331e-06
rs722241	G	T	16	13933400	-0.103384	0.778849	0.0220121	2.64404e-06
rs7590468	G	A	2	68959471	-0.0891075	0.338112	0.0184003	1.2808e-06
rs7786467	A	C	7	1338707	-0.0968338	0.215173	0.0216192	7.49729e-06
rs854661	T	C	17	34354883	0.0827355	0.477202	0.0171553	1.41605e-06
rs1942648	T	C	7	15776571	0.154234	0.0606979	0.0343015	6.91082e-06
rs2252668	A	G	18	33849043	0.104747	0.845037	0.0229062	4.81088e-06
rs3898456	T	C	8	139175349	-0.0824794	0.358345	0.0182774	6.4026e-06
rs4113953	C	G	12	40767990	0.0757262	0.65612	0.0169828	8.23455e-06
rs6021384	C	T	20	50306527	-0.0842745	0.291771	0.0180328	2.96252e-06
rs9600403	C	A	13	75463070	0.0770856	0.455977	0.0164382	2.73993e-06
rs1942648	T	C	7	15776571	0.154392	0.0606979	0.0342993	6.75309e-06
rs2252668	A	G	18	33849043	0.104832	0.845037	0.0229048	4.72048e-06
rs3898456	T	C	8	139175349	-0.0824025	0.358345	0.0182763	6.52228e-06
rs4113953	C	G	12	40767990	0.0755761	0.65612	0.0169817	8.5696e-06
rs6021384	C	T	20	50306527	-0.0843257	0.291771	0.0180317	2.91759e-06
rs9600403	C	A	13	75463070	0.0771876	0.455977	0.0164372	2.65419e-06
rs17553786	T	C	6	92192361	0.165776	0.0624097	0.0366453	6.07402e-06
rs386274	A	C	20	55030081	0.0990318	0.220805	0.0203866	1.18767e-06
rs550057	T	C	9	136146597	0.108642	0.251842	0.0193746	2.05314e-08
rs61877169	G	A	11	12272720	0.104615	0.166305	0.0229385	5.09884e-06
rs61940669	A	G	12	128462574	0.146989	0.113419	0.0326009	6.52197e-06
rs7147611	A	G	14	95024931	-0.0805696	0.655985	0.0180507	8.06228e-06
rs72774015	A	G	10	5138104	0.177381	0.0511835	0.0392824	6.31606e-06
rs72845940	T	G	17	64585285	0.124891	0.125286	0.0259236	1.45252e-06
rs7831606	A	T	8	128455694	-0.103329	0.160938	0.0233385	9.53656e-06
rs1901115	T	C	16	60407480	0.148014	0.800504	0.0311356	1.99593e-06
rs2882716	T	G	7	10085378	0.150637	0.191459	0.0321777	2.84889e-06
rs34829339	C	T	20	55472884	0.128998	0.289818	0.0276442	3.06574e-06
rs3892326	C	T	21	43018030	-0.123001	0.480177	0.0273436	6.84832e-06
rs41294029	T	C	10	5993461	0.217428	0.0817161	0.0477808	5.35114e-06
rs528874	G	T	6	168158836	-0.131345	0.261693	0.0285648	4.26284e-06
rs56025506	T	C	14	80662335	0.123635	0.333398	0.0267314	3.74422e-06
rs6003161	C	A	22	43745368	0.116373	0.523608	0.0255073	5.05861e-06
rs73447940	A	C	7	122783839	0.208638	0.102253	0.0418542	6.2005e-07
rs9828991	T	A	3	104284483	-0.126	0.701253	0.0279267	6.42706e-06
rs2120865	G	A	15	68760516	-0.135913	0.098766	0.029633	4.50622e-06
rs28762974	G	C	3	175089164	-0.0921632	0.255953	0.0208274	9.64027e-06
rs4445887	T	C	16	84374241	0.0850847	0.582531	0.0182563	3.1534e-06
rs62475831	G	A	8	3422401	-0.0971939	0.231695	0.021087	4.04231e-06
rs62551178	C	T	9	92103552	0.102848	0.175177	0.0231497	8.88251e-06
rs6783841	A	C	3	197684166	-0.0824391	0.413128	0.0179128	4.17952e-06
rs6809294	C	G	3	52170862	0.102041	0.223829	0.0218971	3.16163e-06
rs6990479	A	G	8	3136731	-0.0783752	0.370348	0.0175819	8.28345e-06
rs74083978	C	G	14	91621098	0.165522	0.0582206	0.036826	6.96658e-06
rs7591885	A	G	2	46033598	0.0863719	0.498302	0.0176153	9.42751e-07
rs77623116	G	T	3	108857481	-0.104324	0.16628	0.023517	9.15927e-06
rs9459138	T	C	6	164976172	0.0809908	0.667501	0.0183201	9.83072e-06
rs2499076	A	G	10	19592884	-0.188268	0.112541	0.0419687	7.26022e-06
rs2967172	A	G	16	57795394	-0.139093	0.674837	0.028346	9.24897e-07
rs4832418	A	G	2	18348124	-0.151171	0.230343	0.0318897	2.13247e-06
rs512089	C	A	9	23874047	0.137435	0.255292	0.0302868	5.68521e-06
rs55976608	T	C	8	14120793	-0.257391	0.0592176	0.0554762	3.48963e-06
rs72748807	C	T	5	51826323	0.196247	0.0996495	0.0444046	9.8919e-06
rs2499076	A	G	10	19592884	-0.187924	0.111418	0.0405854	3.65072e-06
rs2967172	A	G	16	57795394	-0.143636	0.679113	0.0274092	1.60223e-07
rs35335925	C	G	4	20821100	-0.132772	0.262547	0.0294942	6.74291e-06
rs4832418	A	G	2	18348124	-0.136148	0.232563	0.0306632	8.99052e-06
rs73519430	C	T	8	14112568	-0.208614	0.0834573	0.045703	5.00559e-06
rs7761067	C	T	6	89177710	0.132943	0.726742	0.0300149	9.45624e-06
rs2571	T	G	9	115926317	-0.113956	0.125637	0.0253402	6.89007e-06
rs2774282	C	T	1	114648020	0.0850792	0.76057	0.0190882	8.30477e-06
rs28414316	C	T	2	122972140	0.114905	0.140049	0.0238957	1.51999e-06
rs4278144	C	A	8	62697207	0.0772061	0.351387	0.0172764	7.86282e-06
rs505128	C	T	11	116273511	-0.0790142	0.353603	0.0170449	3.55817e-06
rs56178001	C	G	7	5362944	-0.0829141	0.707901	0.0181179	4.73108e-06
rs61510729	A	G	12	109709157	-0.100197	0.171943	0.0219746	5.1238e-06
rs62365577	C	G	5	83033300	-0.117516	0.123856	0.025764	5.08493e-06
rs680138	T	C	9	110882980	-0.0806635	0.617925	0.0171239	2.47022e-06
rs71446723	A	G	12	20934000	0.113087	0.124427	0.0249499	5.82692e-06
rs73046099	A	G	7	709469	-0.126161	0.110042	0.02691	2.75548e-06
rs742682	C	A	1	114897076	-0.110567	0.132617	0.024218	4.98356e-06
rs80306758	C	A	7	27255650	0.165403	0.061056	0.0366646	6.44505e-06
rs9564193	G	A	13	65333539	-0.174688	0.0508343	0.039027	7.60288e-06
rs28693594	C	A	8	8602444	-0.192657	0.151902	0.0415618	3.56186e-06
rs56162052	C	T	17	36205502	-0.162673	0.725856	0.0337049	1.39028e-06
rs7132825	A	G	12	1500603	0.227758	0.0869464	0.050722	7.11184e-06
rs76236729	T	C	18	8831132	0.194651	0.1294	0.0427432	5.26457e-06
rs7651754	C	T	3	44175797	-0.212476	0.109978	0.0476294	8.15693e-06
rs781762	A	G	6	125244265	0.265272	0.0735549	0.0600061	9.83621e-06
rs3735683	T	C	7	1025533	0.10494	0.21672	0.0220496	1.94295e-06
rs3814989	C	T	7	18634822	0.09487	0.25714	0.0208954	5.61891e-06
rs60248492	G	C	16	69943500	-0.187154	0.0602122	0.0388118	1.42059e-06
rs62227335	T	C	3	140418	-0.216031	0.0539575	0.0401629	7.49479e-08
rs6603134	G	A	19	8106521	-0.0823059	0.593815	0.0183647	7.40355e-06
rs6688656	G	T	1	166377590	-0.0827272	0.57415	0.0185553	8.25652e-06
rs6970565	C	T	7	46173126	-0.0869376	0.371978	0.0192049	5.98711e-06
rs7853135	C	T	9	105974249	-0.0868403	0.660589	0.0191875	6.01482e-06
rs56162052	C	T	17	36205502	-0.159873	0.725439	0.0336197	1.98111e-06
rs7132825	A	G	12	1500603	0.230437	0.0865655	0.0506019	5.26534e-06
rs76236729	T	C	18	8831132	0.188796	0.129339	0.0426104	9.39052e-06
rs7651754	C	T	3	44175797	-0.215544	0.109385	0.0475535	5.82446e-06
rs983309	G	T	8	9177732	-0.197113	0.874439	0.043067	4.71937e-06
SNP for MR analysis between immune cells and EC with traditional defination
SNP	Effect allele	Other allele	Chrosome	Position	Beta	Effect allele frequency	Standard error	P value
rs10002165	C	T	4	145233527	-0.3786	0.0216	0.08521	9.12494e-06
rs10851760	G	A	15	66871840	-0.1506	0.8111	0.03184	2.339e-06
rs11025036	A	G	11	19175633	-0.4567	0.022	0.08253	3.35097e-08
rs117166897	G	A	10	10964820	-0.2471	0.0561	0.05363	4.22795e-06
rs11725463	G	A	4	94584105	-0.2338	0.0589	0.05261	9.07006e-06
rs147688743	A	G	10	64810319	-0.4601	0.0153	0.09898	3.45398e-06
rs1764923	T	G	13	86328055	-0.1177	0.4094	0.02548	3.95704e-06
rs2857229	G	A	12	6900616	0.273	0.2581	0.02764	1.033e-22
rs6022045	C	T	20	51305288	-0.1144	0.5743	0.02505	5.16202e-06
rs62314120	A	G	4	126951113	0.1612	0.1353	0.03605	7.95994e-06
rs7141604	T	C	14	21252046	0.1146	0.3499	0.0256	7.82204e-06
rs7160965	C	T	14	31506505	0.1768	0.8951	0.03976	9.01509e-06
rs72694502	C	T	14	85161244	-0.3783	0.0219	0.08288	5.153e-06
rs72728134	T	A	1	100596929	0.1231	0.2833	0.02752	7.90205e-06
rs77965313	C	A	9	120915115	-0.3127	0.0377	0.06542	1.82301e-06
rs9493240	A	G	6	132534887	0.1385	0.3097	0.0271	3.34904e-07
rs10003087	G	T	4	172937884	0.127	0.3764	0.02658	1.844e-06
rs10876180	T	C	12	51836616	-0.1219	0.6315	0.02662	4.82903e-06
rs111992639	T	G	1	199039653	0.6386	0.0102	0.1246	3.10599e-07
rs113016235	G	T	6	32584977	-0.2092	0.1994	0.03717	1.97301e-08
rs114892491	T	C	1	156921889	-0.2886	0.042	0.06257	4.13304e-06
rs11669637	T	G	19	12690226	-0.1748	0.1263	0.03821	4.95097e-06
rs142421834	G	A	5	52915612	-0.493	0.0128	0.1102	7.90606e-06
rs146907982	A	G	9	120231514	0.2461	0.0584	0.05526	8.72891e-06
rs17692789	A	C	7	122641368	0.4277	0.0182	0.09356	5.01996e-06
rs2055707	T	G	3	78623579	0.1292	0.5277	0.02571	5.31202e-07
rs28383283	T	C	6	32586383	-0.2109	0.281	0.0345	1.09099e-09
rs35706962	T	C	11	106402698	0.558	0.0114	0.1226	5.55495e-06
rs57305384	C	G	1	229002885	0.2029	0.1142	0.04021	4.73097e-07
rs6729180	T	C	2	38920621	0.202	0.3844	0.02624	1.77501e-14
rs6751481	C	T	2	38897810	0.1217	0.4704	0.02575	2.36499e-06
rs6755452	G	T	2	87035076	0.1903	0.1886	0.03241	4.74602e-09
rs7530076	A	G	1	195825276	-0.4005	0.9748	0.08361	1.74e-06
rs76673582	T	C	5	149696943	-0.2404	0.0681	0.05179	3.56303e-06
rs78513507	T	C	5	98468131	0.3462	0.0285	0.07706	7.26307e-06
rs9269614	G	A	6	32545293	0.2271	0.7677	0.04024	1.81001e-08
rs9660907	C	T	1	245039866	0.2574	0.0629	0.05184	7.18903e-07
rs10003087	G	T	4	172937884	0.1291	0.3766	0.0263	9.59003e-07
rs10422969	A	G	19	30096708	0.1742	0.1237	0.03839	5.91494e-06
rs114588192	T	C	5	146490228	0.3812	0.0249	0.08052	2.28102e-06
rs117257206	A	G	8	120880964	0.2618	0.0513	0.05771	5.91003e-06
rs142576649	C	T	12	130856799	0.37	0.024	0.08249	7.51e-06
rs17203867	G	T	6	32556020	-0.285	0.1837	0.0424	2.10087e-11
rs17775026	A	G	16	26221619	0.1223	0.3866	0.0258	2.19498e-06
rs1891587	T	C	1	190077813	0.1224	0.458	0.02543	1.539e-06
rs191991810	C	G	12	38160865	0.3859	0.0424	0.08091	1.92101e-06
rs2055707	T	G	3	78623579	0.1209	0.528	0.02549	2.17701e-06
rs2242597	G	T	17	34245629	-0.2674	0.0505	0.05724	3.111e-06
rs61126090	G	A	6	32586382	-0.2671	0.1973	0.03751	1.30497e-12
rs6431734	A	C	2	15874207	0.1405	0.7922	0.03141	7.92301e-06
rs6729180	T	C	2	38920621	0.1948	0.3848	0.026	8.39267e-14
rs6751481	C	T	2	38897810	0.115	0.4694	0.02551	6.71599e-06
rs6755452	G	T	2	87035076	0.1651	0.1895	0.03214	2.939e-07
rs72731805	A	T	4	147400930	-0.2948	0.0368	0.06653	9.62897e-06
rs7744522	G	A	6	11109693	0.1133	0.5859	0.02501	6.11998e-06
rs78513507	T	C	5	98468131	0.3442	0.0286	0.07624	6.57597e-06
rs9660907	C	T	1	245039866	0.2323	0.0632	0.05137	6.30406e-06
rs1000411	T	C	20	39634616	0.1341	0.2729	0.02931	4.96295e-06
rs10509573	C	T	10	91189221	-0.1305	0.262	0.02914	7.71596e-06
rs116928928	C	T	11	32030595	-0.3318	0.0409	0.06563	4.52304e-07
rs139194198	G	A	13	82921880	0.4981	0.013	0.1123	9.45301e-06
rs143987752	C	T	2	33587355	-0.4097	0.0198	0.09185	8.45006e-06
rs144239147	A	G	17	48154668	0.5126	0.013	0.1131	6.06694e-06
rs149326960	G	T	3	21012581	-0.4159	0.0201	0.09138	5.52904e-06
rs175717	T	A	14	75985604	-0.1327	0.7202	0.02806	2.36401e-06
rs181516190	A	T	7	35264731	0.4995	0.0223	0.08646	8.29908e-09
rs35894198	A	G	2	9361836	0.1808	0.1259	0.0384	2.60699e-06
rs4075635	G	A	11	28511643	-0.1156	0.4515	0.02558	6.41505e-06
rs4080481	A	C	22	37905285	0.1326	0.3738	0.02647	5.76196e-07
rs4669451	C	T	2	9898172	0.1396	0.7378	0.02887	1.378e-06
rs61839660	T	C	10	6094697	0.6113	0.0544	0.05534	6.69576e-28
rs62626343	G	C	10	6128374	0.1385	0.2132	0.03097	7.95591e-06
rs67403544	A	G	4	21653587	0.4626	0.0167	0.09804	2.474e-06
rs7406899	G	A	17	39766504	0.195	0.8771	0.03913	6.49606e-07
rs74553250	T	C	17	40063525	-0.2023	0.1134	0.04055	6.42096e-07
rs79062365	C	T	8	82262167	0.4552	0.0167	0.09661	2.55499e-06
rs10008912	G	A	4	7148069	0.1962	0.5754	0.04231	3.91697e-06
rs10747856	G	A	12	60262116	0.1824	0.5225	0.04013	5.98398e-06
rs114178658	G	A	4	35188325	0.2853	0.1091	0.06394	8.84301e-06
rs116783256	T	C	2	209940257	0.295	0.1127	0.06613	8.88792e-06
rs12818999	A	G	12	5133216	0.4837	0.0365	0.106	5.59706e-06
rs13014690	A	C	2	153797694	0.2167	0.2686	0.04612	2.913e-06
rs140639767	A	C	1	146998040	-0.7914	0.0124	0.1781	9.66807e-06
rs1499672	G	A	1	56037629	-0.194	0.5978	0.04209	4.47899e-06
rs1552721	C	G	11	7000368	-0.4352	0.0497	0.09448	4.52002e-06
rs1886730	C	T	1	2488608	0.2864	0.5778	0.03948	7.00164e-13
rs2246952	G	A	10	70782592	0.279	0.1371	0.05822	1.84701e-06
rs2731518	A	G	3	1896695	0.1923	0.6135	0.04318	9.23294e-06
rs3138035	T	C	17	32645949	0.2134	0.2979	0.04403	1.42298e-06
rs313856	C	T	19	47298263	0.2265	0.7522	0.04776	2.35603e-06
rs62140870	G	A	2	47713921	-0.6421	0.02	0.1439	8.81901e-06
rs6577804	C	T	8	138522864	-0.1933	0.3741	0.04255	6.1e-06
rs73049692	C	T	19	51995348	-0.3789	0.0593	0.08413	7.32099e-06
rs73449242	T	C	13	24033981	0.2877	0.1239	0.06242	4.45102e-06
rs7731342	T	C	5	104549911	0.3429	0.0798	0.07627	7.58106e-06
rs7738988	A	C	6	83760703	0.2264	0.751	0.04713	1.736e-06
rs78389375	T	C	7	81160961	-0.5153	0.0357	0.1084	2.249e-06
rs79388518	C	T	18	1705002	-0.5518	0.0329	0.1189	3.80198e-06
rs10011142	T	C	4	5015486	-0.1374	0.1991	0.03097	9.36807e-06
rs10499824	T	C	7	75171091	0.439	0.0168	0.09702	6.22601e-06
rs10899766	C	T	7	54950551	0.1322	0.3053	0.02688	9.10605e-07
rs117896307	C	T	18	70433020	-0.257	0.0499	0.0576	8.35603e-06
rs117940302	A	G	8	123834904	0.4039	0.0226	0.08531	2.28402e-06
rs1376624	C	T	2	187771135	0.1412	0.2161	0.03053	3.90499e-06
rs139952138	T	G	22	33593799	-0.3522	0.027	0.0774	5.55303e-06
rs143002526	A	T	3	184649632	-0.55	0.0133	0.1127	1.104e-06
rs148057702	T	C	7	97552526	-0.3442	0.0305	0.07454	4.01301e-06
rs149100	G	T	1	162441037	-0.1347	0.4225	0.0251	8.48594e-08
rs16843658	T	C	1	162672134	-0.3609	0.0309	0.07369	1.014e-06
rs16867973	G	A	8	102610279	0.1506	0.165	0.03374	8.30195e-06
rs17549676	A	G	16	63344732	-0.1916	0.0928	0.04281	7.84495e-06
rs1801274	G	A	1	161479745	-0.4628	0.327	0.02573	2.61517e-69
rs2649752	A	C	3	39351805	0.1581	0.2677	0.02862	3.51099e-08
rs28491136	T	C	3	106964051	-0.1603	0.1442	0.03567	7.17893e-06
rs372655475	T	G	6	68886782	-0.2806	0.0426	0.06317	9.18502e-06
rs4512621	C	T	1	162916592	-0.2746	0.0436	0.06145	8.14798e-06
rs4957969	G	A	5	110958260	-0.2538	0.9389	0.05341	2.09899e-06
rs58215329	T	C	3	196465812	0.1816	0.1157	0.03906	3.43598e-06
rs62170788	T	C	2	170958389	-0.2816	0.0418	0.06155	4.92595e-06
rs6952061	T	C	7	30459852	0.2141	0.0745	0.04792	8.17805e-06
rs74574092	C	T	11	100513751	0.2025	0.0915	0.04307	2.68398e-06
rs7791415	T	C	7	44433778	-0.4614	0.0166	0.0962	1.68601e-06
rs894107	C	T	11	71019939	0.1991	0.1167	0.03898	3.41397e-07
rs9542786	C	A	13	72514633	-0.2675	0.95	0.05713	2.93603e-06
rs9823718	G	C	3	39293757	-0.3271	0.132	0.03651	5.15229e-19
rs10011663	G	A	4	190338080	0.1837	0.2411	0.03783	1.29799e-06
rs10025005	T	G	4	181288587	0.1934	0.7764	0.03857	5.85706e-07
rs11594395	G	C	10	2817998	0.514	0.024	0.1111	3.94403e-06
rs11631677	T	C	15	86647805	-0.1627	0.5509	0.03297	8.79205e-07
rs11709025	T	C	3	177439366	0.1544	0.3149	0.03464	8.7791e-06
rs1201940	C	T	20	59281507	-0.1483	0.5073	0.03248	5.33003e-06
rs141080550	A	G	13	111287945	0.4746	0.0307	0.09273	3.40997e-07
rs145231100	A	G	18	33141890	-0.6579	0.0137	0.1354	1.28399e-06
rs17721845	T	C	6	149234718	0.1862	0.2511	0.03754	7.67892e-07
rs1801274	G	A	1	161479745	0.2617	0.3334	0.03479	8.34065e-14
rs192715019	T	C	12	83087530	-0.5266	0.0277	0.09953	1.36301e-07
rs2868992	G	T	2	56232555	-0.205	0.1502	0.04553	7.14299e-06
rs4606283	T	C	1	227581017	0.1686	0.7274	0.03672	4.71205e-06
rs55924578	A	G	9	118204337	-0.66	0.0129	0.1448	5.49604e-06
rs58051708	G	A	17	72998954	-0.721	0.0102	0.159	6.12393e-06
rs62146115	G	A	2	95456961	-0.2861	0.0753	0.06259	5.16297e-06
rs62362950	T	C	5	83003910	-0.3383	0.0597	0.0679	6.87005e-07
rs71596080	C	T	4	82676237	0.2853	0.0826	0.0584	1.12001e-06
rs73716755	C	G	7	116308013	-0.3748	0.0455	0.078	1.67598e-06
rs74638799	G	A	12	11652069	0.2768	0.0797	0.05971	3.81303e-06
rs76640602	A	G	22	39737217	0.5875	0.0202	0.1154	3.94503e-07
rs78173101	G	C	5	148830537	-0.5888	0.0167	0.1268	3.68502e-06
rs9510371	T	C	13	23410009	0.2146	0.158	0.04513	2.133e-06
rs10013442	A	G	4	185924195	0.1825	0.0944	0.04082	8.05805e-06
rs1051488	T	C	6	31322911	0.1684	0.7693	0.03331	4.54695e-07
rs11201613	A	G	10	87172617	-0.4646	0.0144	0.1007	4.11604e-06
rs115797102	T	C	1	196168996	-0.5912	0.0112	0.114	2.29002e-07
rs12160006	C	T	22	32667243	-0.1697	0.1106	0.03778	7.31493e-06
rs12448994	T	C	16	989381	0.1905	0.0925	0.04089	3.27597e-06
[truncated: 44,937 more rows]

## Sheet: Table S3
Table S3. Sensitivity analysis of MR study on 3 types of EC
Sensitivity analysis between gut microbiota and EC with traditional defination
exposure	method	Heterogeneity			Horizontal pleiotropy
		Q	Q_df	Q_pval	egger_intercept	se	pval
.g__Erysipelotrichaceae_noname	MR Egger	9.06332	10	0.526105	-0.0348024	0.0459099	0.465905
	Inverse variance weighted	9.63797	11	0.563216
g__Dialister	MR Egger	2.7962	4	0.592489	0.0149538	0.0715786	0.844723
	Inverse variance weighted	2.83985	5	0.72466
s__Dialister_invisus	MR Egger	2.87768	4	0.578499	-0.0104888	0.0601001	0.869932
	Inverse variance weighted	2.90814	5	0.714145
s__Bacteroides_faecis	MR Egger	10.7031	12	0.554523	0.00637412	0.0279756	0.823602
	Inverse variance weighted	10.755	13	0.631335
s__Bacteroides_massiliensis	MR Egger	1.75766	4	0.780219	-0.0436324	0.0635816	0.53027
	Inverse variance weighted	2.22859	5	0.816696
s__Ruminococcus_obeum	MR Egger	13.1256	11	0.285193	0.00926264	0.0395256	0.819021
	Inverse variance weighted	13.1912	12	0.3553
s__Ruminococcus_torques	MR Egger	2.31639	5	0.803856	0.00426315	0.0582799	0.944523
	Inverse variance weighted	2.32174	6	0.88786
Sensitivity analysis between immune cells and EC with traditional defination
exposure	method	Heterogeneity			Horizontal pleiotropy
		Q	Q_df	Q_pval	egger_intercept	se	pval
PB/PC %B cell	MR Egger	21.777	24	0.592574	0.0296721	0.020584	0.162362
	Inverse variance weighted	23.855	25	0.527765
PB/PC %lymphocyte	MR Egger	11.1829	13	0.595499	-0.0276918	0.0327066	0.412493
	Inverse variance weighted	11.8997	14	0.614354
CD62L- HLA DR++ monocyte AC	MR Egger	14.8191	14	0.390629	0.00616816	0.0277064	0.827042
	Inverse variance weighted	14.8716	15	0.460705
CD86+ myeloid DC AC	MR Egger	19.8752	16	0.225895	-0.0022393	0.0200675	0.912537
	Inverse variance weighted	19.8906	17	0.279861
Activated Treg %CD4	MR Egger	5.37512	12	0.944263	0.0355005	0.0245949	0.174499
	Inverse variance weighted	7.45855	13	0.877002
CD25hi CD45RA- CD4 not Treg AC	MR Egger	7.96363	8	0.437031	0.0261265	0.0323821	0.443095
	Inverse variance weighted	8.61458	9	0.473584
CM CD4+ AC	MR Egger	25.4853	24	0.379788	-0.0204512	0.0219903	0.361627
	Inverse variance weighted	26.4037	25	0.386313
CM CD4+ %T cell	MR Egger	25.9419	22	0.254184	-0.0100226	0.0242226	0.683049
	Inverse variance weighted	26.1438	23	0.294125
T cell %leukocyte	MR Egger	11.4885	16	0.778376	0.0363228	0.023712	0.145097
	Inverse variance weighted	13.835	17	0.678744
CD3- lymphocyte AC	MR Egger	16.508	14	0.283343	0.0147725	0.0301391	0.631625
	Inverse variance weighted	16.7913	15	0.331492
CD24 on transitional	MR Egger	7.47799	15	0.943005	-0.000846675	0.028275	0.976506
	Inverse variance weighted	7.47889	16	0.96289
CD27 on IgD+ CD38- unsw mem	MR Egger	20.0154	20	0.456969	0.00527873	0.0208807	0.803
	Inverse variance weighted	20.0793	21	0.516242
CD27 on IgD- CD38br	MR Egger	14.1501	13	0.363357	-0.0330256	0.0409831	0.434832
	Inverse variance weighted	14.8569	14	0.388003
CD28 on CD28+ DN (CD4-CD8-)	MR Egger	0.969916	1	0.324701	-0.0288889	0.0760876	0.768992
	Inverse variance weighted	1.11407	2	0.572904
CD127 on CD45RA+ CD4+	MR Egger	15.9837	20	0.717638	-0.0167053	0.0223758	0.464003
	Inverse variance weighted	16.541	21	0.738524
CD40 on CD14+ CD16+ monocyte	MR Egger	13.7498	14	0.468513	0.02476	0.0226476	0.29273
	Inverse variance weighted	14.945	15	0.455384
HLA DR on CD14+ CD16- monocyte	MR Egger	20.2372	17	0.262279	0.00380704	0.0198312	0.850039
	Inverse variance weighted	20.281	18	0.317222
HLA DR on CD14+ monocyte	MR Egger	22.3246	17	0.172554	0.00328907	0.0224283	0.885135
	Inverse variance weighted	22.3529	18	0.216694
CD19 on B cell	MR Egger	15.6245	19	0.682166	0.0231205	0.0234165	0.335873
	Inverse variance weighted	16.5994	20	0.678813
HLA DR on CD33br HLA DR+ CD14dim	MR Egger	9.2085	17	0.933493	-0.00147108	0.0229902	0.949727
	Inverse variance weighted	9.21259	18	0.954613
Sensitivity analysis between gut microbiota and EC with endometrioid histology
exposure	method	Heterogeneity			Horizontal pleiotropy
		Q	Q_df	Q_pval	egger_intercept	se	pval
c__Bacilli	MR Egger	6.66044	12	0.879214	0.0367378	0.0273528	0.204088
	Inverse variance weighted	8.46438	13	0.812087
f__Bacteroidaceae	MR Egger	10.2849	12	0.590986	0.0295667	0.0296309	0.338058
	Inverse variance weighted	11.2805	13	0.58733
o__Lactobacillales	MR Egger	5.11009	10	0.883703	0.0241193	0.034218	0.496978
	Inverse variance weighted	5.60694	11	0.898262
s__Eggerthella_unclassified	MR Egger	0.000103181	1	0.991895	0.122968	0.258745	0.717562
	Inverse variance weighted	0.225965	2	0.893166
s__Alistipes_senegalensis	MR Egger	8.75677	10	0.555333	-0.0371726	0.0357859	0.323385
	Inverse variance weighted	9.83577	11	0.545218
s__Alistipes_sp_AP11	MR Egger	10.7541	8	0.216027	-0.00665538	0.0374432	0.863341
	Inverse variance weighted	10.7965	9	0.289913
s__Holdemania_unclassified	MR Egger	11.0766	8	0.197396	-0.0222825	0.0422919	0.612574
	Inverse variance weighted	11.461	9	0.245429
Sensitivity analysis between immune cells and EC with endometrioid histology
exposure	method	Heterogeneity			Horizontal pleiotropy
		Q	Q_df	Q_pval	egger_intercept	se	pval
IgD- CD24- %B cell	MR Egger	12.3496	11	0.337949	0.00576442	0.0225256	0.802746
	Inverse variance weighted	12.4231	12	0.412327
IgD- CD38dim %B cell	MR Egger	11.1101	17	0.850785	0.00623253	0.0125664	0.626268
	Inverse variance weighted	11.3561	18	0.878641
IgD+ CD38br %lymphocyte	MR Egger	19.4462	23	0.675045	-0.00238845	0.012199	0.846494
	Inverse variance weighted	19.4845	24	0.72568
Naive-mature B cell %lymphocyte	MR Egger	12.4581	20	0.899407	-0.016331	0.0160057	0.319759
	Inverse variance weighted	13.4991	21	0.890137
CD20- %lymphocyte	MR Egger	6.66405	13	0.918625	0.0081382	0.016405	0.628119
	Inverse variance weighted	6.91014	14	0.93812
CD11c+ monocyte %monocyte	MR Egger	11.3162	17	0.839662	0.00813879	0.0128207	0.533999
	Inverse variance weighted	11.7192	18	0.861391
CD4 Treg %T cell	MR Egger	22.6129	13	0.0465632	0.00146163	0.0230993	0.950509
	Inverse variance weighted	22.6199	14	0.0667435
CD39+ activated Treg %CD4 Treg	MR Egger	10.6585	16	0.83006	-0.014739	0.0136966	0.29784
	Inverse variance weighted	11.8165	17	0.811121
Activated & resting Treg %CD4+	MR Egger	34.0591	23	0.0643081	0.0156766	0.0128932	0.236362
	Inverse variance weighted	36.2483	24	0.0519152
CD25hi CD45RA- CD4 not Treg %T cell	MR Egger	34.2027	23	0.0622836	0.00801856	0.0147729	0.592497
	Inverse variance weighted	34.6408	24	0.0739074
Im MDSC AC	MR Egger	17.0437	17	0.451409	0.0095323	0.0142916	0.513733
	Inverse variance weighted	17.4897	18	0.489712
CD33dim HLA DR- AC	MR Egger	11.832	17	0.810199	-0.00777478	0.0120333	0.526837
	Inverse variance weighted	12.2495	18	0.834092
CM CD4+ %CD4+	MR Egger	32.972	24	0.104666	0.00476464	0.014852	0.751133
	Inverse variance weighted	33.1134	25	0.128258
CM CD4+ %T cell	MR Egger	38.6643	22	0.0154139	0.00574574	0.0222921	0.798997
	Inverse variance weighted	38.7811	23	0.0209662
Naive CD8br %T cell	MR Egger	19.9749	21	0.522852	-0.0171571	0.0156746	0.286096
	Inverse variance weighted	21.173	22	0.510069
Transitional AC	MR Egger	22.8994	26	0.638632	-0.00417035	0.0126331	0.74396
	Inverse variance weighted	23.0084	27	0.684563
DP (CD4+CD8+) %leukocyte	MR Egger	17.4531	20	0.623385	-0.00954997	0.0159664	0.556466
	Inverse variance weighted	17.8109	21	0.660939
HLA DR+ CD4+ AC	MR Egger	15.2127	19	0.708988	0.0150169	0.0144156	0.310619
	Inverse variance weighted	16.2978	20	0.697983
CD8br NKT %T cell	MR Egger	23.5654	23	0.428191	0.00751844	0.014267	0.603253
	Inverse variance weighted	23.8499	24	0.470206
CD45RA+ CD28- CD8br AC	MR Egger	193.958	209	0.764657	-0.0116431	0.00852735	0.173601
	Inverse variance weighted	195.822	210	0.75026
CD20 on IgD- CD24-	MR Egger	28.8753	23	0.184481	0.00918192	0.0180882	0.616554
	Inverse variance weighted	29.1988	24	0.21274
CD27 on IgD- CD38br	MR Egger	8.76115	12	0.723185	-0.0183497	0.0291804	0.541242
	Inverse variance weighted	9.15659	13	0.761017
CD3 on NKT	MR Egger	6.67045	11	0.825109	-0.00526839	0.0163748	0.753683
	Inverse variance weighted	6.77397	12	0.872182
CD3 on HLA DR+ CD8br	MR Egger	24.784	19	0.167776	-0.00204962	0.0157219	0.897646
	Inverse variance weighted	24.8061	20	0.208948
CD127 on CD45RA+ CD4+	MR Egger	6.87034	20	0.997089	-0.00698228	0.0144102	0.633269
	Inverse variance weighted	7.10512	21	0.997926
CD25 on CD45RA- CD4 not Treg	MR Egger	12.9473	15	0.606366	0.00219332	0.0126825	0.865009
	Inverse variance weighted	12.9772	16	0.674421
HLA DR on CD14+ monocyte	MR Egger	11.7807	14	0.623909	-0.00149582	0.013956	0.916166
	Inverse variance weighted	11.7922	15	0.694686
Sensitivity analysis between gut microbiota and EC with non-endometrioid histology
exposure	method	Heterogeneity			Horizontal pleiotropy
		Q	Q_df	Q_pval	egger_intercept	se	pval
s__Ruminococcus_bromii	MR Egger	2.45248	5	0.783634	-0.0363237	0.143514	0.810266
	Inverse variance weighted	2.51654	6	0.866612
s__Bacteroides_stercoris	MR Egger	1.92086	5	0.859984	-0.309612	0.184591	0.154331
	Inverse variance weighted	4.73415	6	0.578335
s__Lachnospiraceae_bacterium_5_1_63FAA	MR Egger	0.078846	3	0.994249	0.0422056	0.120626	0.749545
	Inverse variance weighted	0.201268	4	0.995264
Sensitivity analysis between immune cells and EC with non-endometrioid histology
exposure	method	Heterogeneity			Horizontal pleiotropy
		Q	Q_df	Q_pval	egger_intercept	se	pval
Sw mem AC	MR Egger	14.9744	17	0.597328	0.0238627	0.0389436	0.548152
	Inverse variance weighted	15.3498	18	0.637823
IgD- CD38dim %lymphocyte	MR Egger	10.7666	18	0.903996	-0.00521623	0.0328381	0.875558
	Inverse variance weighted	10.7919	19	0.930641
IgD+ CD38br %lymphocyte	MR Egger	9.29775	22	0.991632	0.05924	0.0295308	0.0573016
	Inverse variance weighted	13.3219	23	0.94466
CD39+ secreting Treg AC	MR Egger	16.0991	18	0.585631	0.0363165	0.0412228	0.38994
	Inverse variance weighted	16.8752	19	0.598321
CD25hi AC	MR Egger	9.83337	13	0.7075	0.0133032	0.0523119	0.803238
	Inverse variance weighted	9.89804	14	0.769599
CD14+ CD16- monocyte %monocyte	MR Egger	8.56509	13	0.80494	-0.00984687	0.0400414	0.809586
	Inverse variance weighted	8.62557	14	0.854263
CD16+ monocyte %monocyte	MR Egger	8.98286	16	0.914118	0.00259502	0.0364275	0.944091
	Inverse variance weighted	8.98794	17	0.940639
CD8br AC	MR Egger	23.2464	18	0.181298	0.0421657	0.0343378	0.235276
	Inverse variance weighted	25.1938	19	0.154261
CD8dim %leukocyte	MR Egger	11.767	12	0.464568	0.052815	0.0477231	0.290118
	Inverse variance weighted	12.9918	13	0.448446
DN (CD4-CD8-) %leukocyte	MR Egger	10.7559	13	0.631261	0.0320097	0.0528293	0.555008
	Inverse variance weighted	11.123	14	0.676348
HLA DR+ T cell%T cell	MR Egger	18.6671	23	0.720366	0.0282274	0.0264152	0.296336
	Inverse variance weighted	19.8091	24	0.707581
HLA DR+ T cell%lymphocyte	MR Egger	17.406	20	0.626475	0.0146965	0.0318307	0.649274
	Inverse variance weighted	17.6192	21	0.67296
HLA DR+ CD8br AC	MR Egger	24.2292	26	0.56286	-0.00518284	0.0279316	0.854234
	Inverse variance weighted	24.2636	27	0.615655
CD8br NKT %lymphocyte	MR Egger	22.4742	23	0.491803	0.00965128	0.0358637	0.790244
	Inverse variance weighted	22.5466	24	0.546679
CD39+ CD4+ %CD4+	MR Egger	19.3205	20	0.501089	0.0237601	0.0330855	0.480976
	Inverse variance weighted	19.8362	21	0.531655
CD28+ CD45RA+ CD8dim %T cell	MR Egger	7.54331	21	0.996797	0.000173408	0.0269288	0.994923
	Inverse variance weighted	7.54336	22	0.998178
CD28+ CD45RA+ CD8dim AC	MR Egger	14.3976	20	0.809781	-0.03046	0.0285087	0.298046
	Inverse variance weighted	15.5391	21	0.794961
CD28- CD8br %CD8br	MR Egger	14.6834	21	0.838499	0.00437631	0.0360082	0.904422
	Inverse variance weighted	14.6981	22	0.874864
CD28+ CD45RA+ CD8br %CD8br	MR Egger	5.70618	17	0.994952	-0.0388229	0.0316691	0.236951
	Inverse variance weighted	7.20899	18	0.988242
CD28- DN (CD4-CD8-) %T cell	MR Egger	27.0885	21	0.167943	-0.0724819	0.0611528	0.249155
	Inverse variance weighted	28.9007	22	0.147719
CD45RA- CD28- CD8br AC	MR Egger	89.7021	67	0.0335222	-0.0076119	0.025906	0.769798
	Inverse variance weighted	89.8177	68	0.0394336
CD45RA+ CD28- CD8br AC	MR Egger	194.558	181	0.232576	-0.0164625	0.022044	0.456152
	Inverse variance weighted	195.158	182	0.239333
BAFF-R on IgD- CD38-	MR Egger	6.26011	8	0.61812	-0.0103039	0.0352464	0.777466
	Inverse variance weighted	6.34558	9	0.704895
CD19 on PB/PC	MR Egger	23.9827	19	0.196818	-0.0388454	0.0454659	0.403535
	Inverse variance weighted	24.9041	20	0.205125
CD25 on naive-mature B cell	MR Egger	12.2439	18	0.834395	0.0161403	0.0312657	0.611977
	Inverse variance weighted	12.5104	19	0.862668
CD38 on IgD+	MR Egger	13.0079	12	0.368463	0.0030811	0.0470351	0.948849
	Inverse variance weighted	13.0126	13	0.446839
CD45 on CD14+ monocyte	MR Egger	10.8249	11	0.458051	0.0300712	0.0434207	0.502947
	Inverse variance weighted	11.3045	12	0.50302
CD25 on CD45RA- CD4 not Treg	MR Egger	9.4745	15	0.851431	-0.0144045	0.0317047	0.656095
	Inverse variance weighted	9.68091	16	0.882752
FSC-A on NKT	MR Egger	18.6819	18	0.411653	-0.0289229	0.0453228	0.531409
	Inverse variance weighted	19.1046	19	0.450147
CCR2 on CD14- CD16+ monocyte	MR Egger	15.4723	15	0.417964	0.034285	0.044094	0.448929
	Inverse variance weighted	16.0959	16	0.44629
CCR2 on CD14+ CD16+ monocyte	MR Egger	22.2513	22	0.444979	-0.0170887	0.0290748	0.562685
	Inverse variance weighted	22.6007	23	0.484282
CD64 on CD14+ CD16+ monocyte	MR Egger	12.0158	10	0.283999	-0.00868825	0.0472383	0.857749
	Inverse variance weighted	12.0565	11	0.359414
CD19 on B cell	MR Egger	13.2171	18	0.77852	0.0198019	0.0385429	0.613667
	Inverse variance weighted	13.481	19	0.813062
CD39 on CD39+ secreting Treg	MR Egger	8.10959	14	0.883539	0.022116	0.0390975	0.580577
	Inverse variance weighted	8.42956	15	0.905409
CD4 on activated Treg	MR Egger	22.4146	19	0.264109	0.0434854	0.0379845	0.266501
	Inverse variance weighted	23.9608	20	0.244109
CD45RA on naive CD4+	MR Egger	32.5036	27	0.213947	-0.00962997	0.0310341	0.758713
	Inverse variance weighted	32.6195	28	0.250038
CD45RA on CD39+ resting Treg	MR Egger	8.07698	5	0.152044	0.0664966	0.0630659	0.339962
	Inverse variance weighted	9.87291	6	0.130107
HLA DR on HLA DR+ CD8br	MR Egger	10.7752	13	0.62964	0.0032424	0.0388749	0.934799
	Inverse variance weighted	10.7822	14	0.703055

## Sheet: Table S4
Table S4. MR and Sensitivity analysis between gut microbiota and immune cells
MR and Sensitivity analysis between gut microbiota and immune cells in EC with traditional defination
outcome	exposure	method	nsnp	beta	se	pvalue	or	or_lci95	or_uci95	Heterogeneity			Horizontal pleiotropy
										Q	Q_df	Q_pval	egger_intercept	se	pval
CD25hi CD45RA- CD4 not Treg AC	g__Dialister.s__Dialister_invisus	MR Egger	6	0.263862	0.465602	0.601197	1.30195	0.522716	3.24282	1.69191	4	0.792187	-0.0104436	0.075545	0.896728
	g__Dialister.s__Dialister_invisus	Inverse variance weighted	6	0.200686	0.0891493	0.0243775	1.22224	1.02629	1.4556	1.71102	5	0.887509
CD62L- HLA DR++ monocyte AC	g__Bacteroides.s__Bacteroides_massiliensis	MR Egger	6	-0.449411	0.653488	0.529437	0.638004	0.177241	2.29659	5.40961	4	0.24779	0.0270237	0.0983625	0.797125
CD62L- HLA DR++ monocyte AC	g__Bacteroides.s__Bacteroides_massiliensis	Inverse variance weighted	6	-0.272863	0.107204	0.0109192	0.761197	0.616941	0.939184	5.51168	5	0.356666
CD86+ myeloid DC AC	g__Blautia.s__Ruminococcus_obeum	MR Egger	13	-0.388954	0.375599	0.322639	0.677765	0.324611	1.41513	5.53455	11	0.902549	0.0207533	0.0405617	0.619012
CD86+ myeloid DC AC	g__Blautia.s__Ruminococcus_obeum	Inverse variance weighted	13	-0.202177	0.0883918	0.0221793	0.81695	0.686997	0.971485	5.79633	12	0.925999
CD27 on IgD+ CD38- unsw mem	g__Blautia.s__Ruminococcus_obeum	MR Egger	13	0.678707	0.494854	0.197538	1.97133	0.74736	5.19981	6.92373	11	0.805226	-0.0414057	0.0532651	0.453345
CD27 on IgD+ CD38- unsw mem	g__Blautia.s__Ruminococcus_obeum	Inverse variance weighted	13	0.304657	0.115508	0.00835104	1.35616	1.08141	1.70072	7.52801	12	0.820843
CD27 on IgD- CD38br	g__Blautia.s__Ruminococcus_obeum	MR Egger	13	0.28757	0.362187	0.443998	1.33318	0.655526	2.71137	7.26443	11	0.777283	-0.0096186	0.0389982	0.809727
CD27 on IgD- CD38br	g__Blautia.s__Ruminococcus_obeum	Inverse variance weighted	13	0.200709	0.0845858	0.0176515	1.22227	1.03554	1.44267	7.32526	12	0.835392
MR and Sensitivity analysis between gut microbiota and immune cells in EC with endometrioid histology
outcome	exposure	method	nsnp	beta	se	pvalue	or	or_lci95	or_uci95	Heterogeneity			Horizontal pleiotropy
										Q	Q_df	Q_pval	egger_intercept	se	pval
IgD+ CD38br %lymphocyte	p__Firmicutes.c__Bacilli	MR Egger	14	0.0401551	0.277926	0.887518	1.04097	0.60376	1.79479	10.6356	12	0.560377	0.0161093	0.0368253	0.669553
IgD+ CD38br %lymphocyte	p__Firmicutes.c__Bacilli	Inverse variance weighted	14	0.15851	0.0635787	0.012662	1.17176	1.03448	1.32727	10.827	13	0.625309
Transitional AC	p__Firmicutes.c__Bacilli	MR Egger	14	0.0961788	0.275247	0.732824	1.10096	0.641911	1.88827	6.48306	12	0.889803	0.00884015	0.0364649	0.812542
Transitional AC	p__Firmicutes.c__Bacilli	Inverse variance weighted	14	0.161136	0.0629787	0.0105099	1.17485	1.03842	1.3292	6.54183	13	0.924196
CD39+ activated Treg %CD4 Treg	c__Bacilli.o__Lactobacillales	MR Egger	12	0.180968	0.341522	0.607753	1.19838	0.613599	2.34047	10.0701	10	0.434368	0.000362116	0.0482017	0.994154
CD39+ activated Treg %CD4 Treg	c__Bacilli.o__Lactobacillales	Inverse variance weighted	12	0.183485	0.0664556	0.00576221	1.2014	1.05467	1.36853	10.0701	11	0.524091
Transitional AC	g__Holdemania.s__Holdemania_unclassified	MR Egger	10	0.0422202	0.250121	0.870144	1.04312	0.638894	1.70311	5.32993	8	0.7218	0.0126828	0.0432107	0.776602
Transitional AC	g__Holdemania.s__Holdemania_unclassified	Inverse variance weighted	10	0.11388	0.0543366	0.0360976	1.12062	1.00741	1.24655	5.41608	9	0.796635
MR and Sensitivity analysis between gut microbiota and immune cells in EC with non-endometrioid histology
outcome	exposure	method	nsnp	beta	se	pvalue	or	or_lci95	or_uci95	Heterogeneity			Horizontal pleiotropy
										Q	Q_df	Q_pval	egger_intercept	se	pval
IgD- CD38dim %lymphocyte	g__Ruminococcus.s__Ruminococcus_bromii	MR Egger	7	0.0584355	0.595066	0.925589	1.06018	0.330254	3.40337	3.18323	5	0.671762	0.017932	0.0765178	0.824006
IgD- CD38dim %lymphocyte	g__Ruminococcus.s__Ruminococcus_bromii	Inverse variance weighted	7	0.196069	0.0958519	0.0408016	1.21661	1.00823	1.46806	3.23815	6	0.778418
CD25hi AC	g__Ruminococcus.s__Ruminococcus_bromii	MR Egger	7	-0.1231	0.63071	0.852937	0.884175	0.256843	3.04375	1.86296	5	0.867763	-0.0176948	0.0809623	0.835636
CD25hi AC	g__Ruminococcus.s__Ruminococcus_bromii	Inverse variance weighted	7	-0.259124	0.102209	0.0112372	0.771727	0.631628	0.942901	1.91073	6	0.927723
CD8dim %leukocyte	g__Ruminococcus.s__Ruminococcus_bromii	MR Egger	7	0.427681	0.606717	0.512338	1.5337	0.466973	5.03718	1.71773	5	0.886659	-0.0273553	0.0778666	0.739675
CD8dim %leukocyte	g__Ruminococcus.s__Ruminococcus_bromii	Inverse variance weighted	7	0.217366	0.0985369	0.0273888	1.2428	1.02453	1.50757	1.84114	6	0.933713
CD8br NKT %lymphocyte	g__Ruminococcus.s__Ruminococcus_bromii	MR Egger	7	0.416596	0.60197	0.51972	1.51679	0.466142	4.93552	0.8007	5	0.976989	-0.0279459	0.0772452	0.732301
CD8br NKT %lymphocyte	g__Ruminococcus.s__Ruminococcus_bromii	Inverse variance weighted	7	0.20171	0.0978404	0.0392441	1.22349	1.00999	1.48212	0.931587	6	0.988073
